# Supplementary material for: Direct carboxylation of allylic halides with carbon dioxide in the presence of indium
Source: Royal Society of Chemistry journal article supplement (doi:10.1039/c4cc00148f), 2014-01-01

## Direct Carboxylation of Allylic Halides with Carbon Dioxide in the Presence of Indium

Bukeyan Miao<sup>a</sup> and Shengming Ma<sup>\*a,b</sup>

<sup>a</sup> Shanghai key laboratory of Green Chemistry and Chemical Process, Department of Chemistry, East China Normal University, 3663 North Zhongshan Lu, Shanghai 200062, P. R. China

<sup>b</sup> State Key Laboratory of Organometallic Chemistry, Shanghai Institute of Organic Chemistry, Chinese Academy of Sciences, 345 Lingling Lu, Shanghai 200032, P. R. China

Fax: (+86)21-64167510      E-mail: [masm@sioc.ac.cn](mailto:masm@sioc.ac.cn)

### Supporting Information

#### Table of Contents

|                                                                              |         |
|------------------------------------------------------------------------------|---------|
| General Information                                                          | S2      |
| Tables S1-3, Scheme S1                                                       | S2-S4   |
| Experimental Details and Analytical Data                                     | S5-S16  |
| <sup>1</sup> H, <sup>13</sup> C, and <sup>19</sup> F NMR Spectra of Products | S17-S52 |

**General Information.** All reactions were carried out in a 25 mL autoclave. Allylic bromides **1a-1e** and **1j-1o** were prepared from the corresponding alcohols according to the literature.<sup>1,2</sup> Allylic bromides **1f** (from Adamas), **1g** (from Acros), **1h** (from TCI), **1i** (from Alfa-Aesar) were purchased from commercial sources. Indium powder (425 mesh) was purchased from Changsha Asian Light Economic Trade Co, Ltd and used without further purification. CsF was purchased from Alfa-Aesar. DMF and DCM were dried over CaH<sub>2</sub> before distillation. The purity of CO<sub>2</sub> is over 99.995% and used without purification. All the temperatures are referred to the bath temperature. NMR spectra were taken using TMS (<sup>1</sup>H,  $\delta$  = 0), CDCl<sub>3</sub> (<sup>13</sup>C CPD,  $\delta$  = 77.0) and CFCI<sub>3</sub> (<sup>19</sup>F CPD,  $\delta$  = 0) as the internal standards.

**Table S1** Survey of Solvents for In-mediated Allylation of Carbon Dioxide.<sup>a</sup>

$$\text{In} + \text{CH}_2=\text{CH}-\text{CH}_2\text{Br} \xrightarrow[\text{solvent, 60 } ^\circ\text{C, 14 h}]{\text{CO}_2 (3.0 \text{ MPa})} \text{CH}_2=\text{CH}-\text{CH}_2\text{COOH}$$

0.67 equiv.      1.0 equiv.      **2a**

| Entry | Solvent <sup>b</sup>             | Yield of <b>2a</b> (%) <sup>c</sup> |
|-------|----------------------------------|-------------------------------------|
| 1     | DMF                              | 59                                  |
| 2     | DMF <sup>d</sup>                 | 51                                  |
| 3     | DMA                              | 17                                  |
| 4     | DMI                              | 39                                  |
| 5     | NMP                              | 23                                  |
| 6     | DME                              | 11                                  |
| 7     | Dioxane                          | 2                                   |
| 8     | MTBE                             | 1                                   |
| 9     | THF                              | 23                                  |
| 10    | H <sub>2</sub> O:THF=1:1         | n.d.                                |
| 11    | NH <sub>4</sub> Cl(aq.) :THF=1:1 | n.d.                                |
| 12    | H <sub>2</sub> O                 | n.d.                                |
| 13    | NH <sub>4</sub> Cl (aq.)         | n.d.                                |
| 14    | EtOH                             | n.d.                                |
| 15    | CH <sub>3</sub> CN               | n.d.                                |
| 16    | DCM                              | n.d.                                |
| 17    | Toluene                          | n.d.                                |

<sup>a</sup> The reaction was conducted with 1.5 mmol of allyl bromide, 1.0 mmol of Indium powder (425 mesh) under a 3 MPa CO<sub>2</sub> atmosphere in 5 mL of corresponding solvents at 60 °C. <sup>b</sup> DMF, DMA, DMI, NMP, CH<sub>3</sub>CN and DCM were dried over CaH<sub>2</sub> before distillation. DME, dioxane, MTBE, THF and toluene were dried over sodium before distillation. EtOH was dried with magnesium before distillation. <sup>c</sup> Determined by <sup>1</sup>H NMR analysis using 17.5  $\mu$ L of CH<sub>2</sub>Br<sub>2</sub> as the internal standard. <sup>d</sup> Purchased from Shanghai Chemical Reagent Co., Ltd. and was used without further drying.

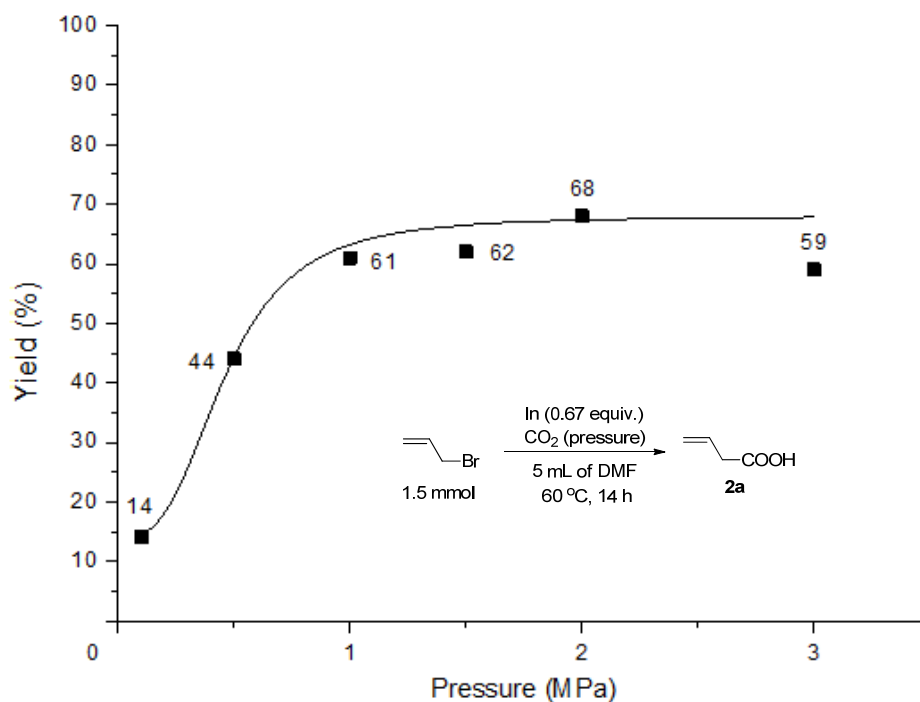

**Scheme S1.** The Effect of CO<sub>2</sub> Pressure on the Reaction.

**Table S2.** Survey of Temperature and Loading of Indium.<sup>a</sup>

| $\text{In } x \text{ equiv.} + \text{allyl bromide } 1.0 \text{ equiv.} \xrightarrow[\text{DMF, temp., 14 h}]{\text{CO}_2 (2 \text{ MPa})} \text{allyl carboxylic acid } 2a$ |            |      |                                 |
|------------------------------------------------------------------------------------------------------------------------------------------------------------------------------|------------|------|---------------------------------|
| Entry                                                                                                                                                                        | Temp. (°C) | x    | Yield of <b>2a</b> <sup>b</sup> |
| 1                                                                                                                                                                            | 60         | 0.67 | 68                              |
| 2                                                                                                                                                                            | 45         | 0.67 | 32                              |
| 3                                                                                                                                                                            | 19         | 0.67 | 6                               |
| 4                                                                                                                                                                            | 60         | 0.77 | 62                              |
| 5                                                                                                                                                                            | 60         | 0.91 | 53                              |

<sup>a</sup> The reaction was conducted with 1.5 mmol of allyl bromide, x mmol of In (powder, 425 mesh) under a 2 MPa CO<sub>2</sub> atmosphere in 5 ml of anhydrous DMF. <sup>b</sup> Determined by <sup>1</sup>H NMR analysis using CH<sub>2</sub>Br<sub>2</sub> as the internal standard. <sup>c</sup> 14.5 h. <sup>d</sup> The reaction was conducted with 1.3 mmol of allyl bromide. <sup>e</sup> The reaction was conducted with 1.1 mmol of allylic bromide.

**Table S3.** Survey of Additives.<sup>a</sup>

| <div><div>In</div><div>+</div><div></div><div>0.67 equiv.</div></div> <div><div><div>CO<sub>2</sub> (2.0 MPa)<br/>additive (x equiv.)</div><div>DMF, 60 °C, 14 h</div></div><div>→</div></div> <div><div></div><div><b>2a</b></div></div> |                   |                                 |
|-------------------------------------------------------------------------------------------------------------------------------------------------------------------------------------------------------------------------------------------------------------------------------------------------------------------------------------------------------------------------------------------------------------|-------------------|---------------------------------|
| Entry                                                                                                                                                                                                                                                                                                                                                                                                       | Additive (equiv.) | Yield of <b>2a</b> <sup>b</sup> |
| 1                                                                                                                                                                                                                                                                                                                                                                                                           | -                 | 68                              |
| 2                                                                                                                                                                                                                                                                                                                                                                                                           | LiI (1.0)         | 47                              |
| 3                                                                                                                                                                                                                                                                                                                                                                                                           | NaI (1.0)         | 57                              |
| 4                                                                                                                                                                                                                                                                                                                                                                                                           | LiCl (1.0)        | 61                              |
| <b>5</b>                                                                                                                                                                                                                                                                                                                                                                                                    | <b>CsF (1.0)</b>  | <b>72</b>                       |
| 6                                                                                                                                                                                                                                                                                                                                                                                                           | CsF(0.67)         | 69                              |
| 7                                                                                                                                                                                                                                                                                                                                                                                                           | CsF (0.1)         | 65                              |

<sup>a</sup> The reaction was conducted with 1.5 mmol of allyl bromide, 1.0 mmol of In (powder, 425 mesh) and corresponding additive under a 2 MPa CO<sub>2</sub> atmosphere in 5 mL of anhydrous DMF at 60 °C. <sup>b</sup> Determined by <sup>1</sup>H NMR analysis using CH<sub>2</sub>Br<sub>2</sub> as the internal standard.

## Synthesis of $\beta,\gamma$ -unsaturated Carboxylic Acids by Carboxylation of Allylic Bromides with CO<sub>2</sub> (Table 5 and Table 6).

### 1. Synthesis of 3-Phenyl-3-butenic Acid (**2b**, mbky-7-094):

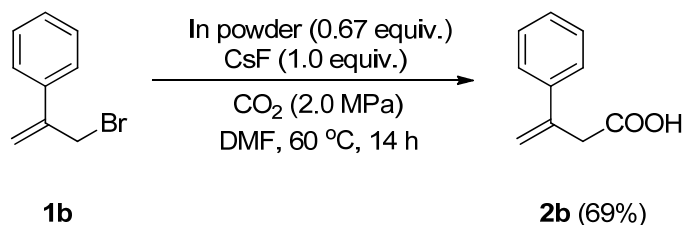

**Typical procedure I:** To a 25 mL autoclave equipped with a magnetic stirring bar was added CsF (227.9 mg, 1.50 mmol), which was stored in a glove box. Then indium powder (114.7 mg, 1.00 mmol), **1b** (295.6 mg, 1.50 mmol), and DMF (5 mL) were added in the open air. The autoclave was pressurized to 2 MPa with CO<sub>2</sub> and the resulting solution was stirred at 60 °C for 14 h. After slowly releasing the pressure, the resulting suspension was transferred into a 50 mL funnel flask with a glass dropper. The autoclave was washed with ethyl acetate (5 mL  $\times$  2) and the mixture was quenched with 20 mL of 3 M HCl. The aqueous layer was extracted with ethyl acetate (10 mL  $\times$  4) and the combined organic layer was washed with 30 mL of brine, dried over anhydrous Na<sub>2</sub>SO<sub>4</sub>, filtrated and concentrated. The crude product was purified by column chromatography on silica gel to afford 168.9 mg of **2b**<sup>3</sup> (69%, eluent: petroleum ether/ethyl acetate = 5/1  $\rightarrow$  dichloromethane / methanol = 80/1) as a yellow solid: m.p. 48-49 °C (petroleum ether/ ethyl acetate) (Lit.<sup>3d</sup> m.p.: 45-46 °C, petroleum ether): <sup>1</sup>H NMR (300 MHz, CDCl<sub>3</sub>)  $\delta$  11.07 (bs, 1 H, COOH), 7.50-7.16 (m, 5 H, ArH), 5.57 (s, 1 H, one proton of CH<sub>2</sub>=), 5.24 (s, 1 H, one proton of CH<sub>2</sub>=), 3.53 (s, 2 H, CH<sub>2</sub>); <sup>13</sup>C NMR (75 MHz, CDCl<sub>3</sub>)  $\delta$  177.9, 140.0, 139.3, 128.4, 127.9, 125.7, 116.8, 40.9; MS (m/z) 162 (M<sup>+</sup>, 93.27), 115 (100); IR (neat, cm<sup>-1</sup>) 2925, 2858, 1709, 1630, 1495, 1409, 1298, 1228, 1166, 1077, 1028.

The following compounds were prepared according to this **Typical Procedure I**.

### 2. Synthesis of 3-(1-Naphthyl)-3-butenic Acid (**2c**, mbky-7-120, mbky-8-079):

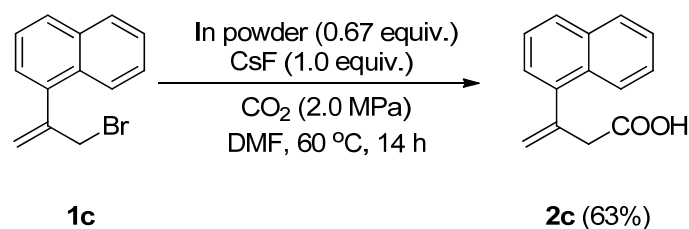

The reaction of **1c** (370.7 mg, 1.50 mmol), indium powder (114.9 mg, 1.00 mmol), CsF (228.0 mg, 1.50 mmol), and CO<sub>2</sub> in 5 mL of DMF afforded 201.1 mg of **2c**<sup>3</sup> (63%, eluent: petroleum ether/ethyl acetate = 5/1 → dichloromethane / methanol = 80/1) as a white solid: m.p. 76-77 °C (petroleum ether/ ethyl acetate) (Lit.<sup>3a</sup> m.p.: 74.5 °C): <sup>1</sup>H NMR (300 MHz, CDCl<sub>3</sub>) δ 10.01 (bs, 1 H, COOH), 8.05-7.90 (m, 1 H, ArH) 7.85-7.70 (m, 2 H, ArH), 7.50-7.20 (m, 4 H, ArH), 5.59 (s, 1 H, one proton of CH<sub>2</sub>=), 5.32 (s, 1 H, one proton of CH<sub>2</sub>=), 3.53 (s, 2 H, CH<sub>2</sub>); <sup>13</sup>C NMR (75 MHz, CDCl<sub>3</sub>) δ 177.4, 140.3, 139.4, 133.7, 130.8, 128.3, 127.8, 126.1, 125.7, 125.4, 125.3, 125.2, 120.3, 43.3; MS (m/z) 212 (M<sup>+</sup>, 4.90), 91 (100); IR (neat, cm<sup>-1</sup>) 3039, 2929, 2851, 1708, 1440, 1411, 1320, 1297, 1269, 1168, 1129, 1005.

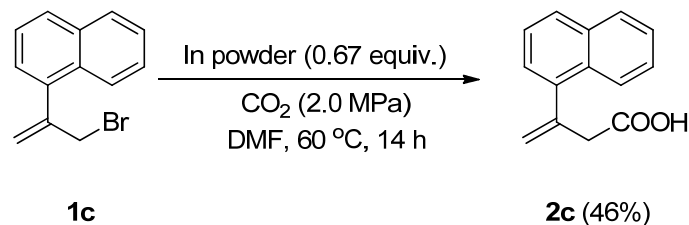

The reaction of **1c** (370.7 mg, 1.50 mmol), indium powder (114.8 mg, 1.00 mmol) and CO<sub>2</sub> in 5 mL of DMF afforded 147.8 mg of **2c**<sup>3</sup> (46%, eluent: petroleum ether/ethyl acetate = 5/1 → dichloromethane / methanol = 80/1) as a white solid: m.p. 76-77 °C (petroleum ether/ ethyl acetate) (Lit.<sup>3a</sup> m.p.: 74.5 °C): <sup>1</sup>H NMR (300 MHz, CDCl<sub>3</sub>) δ 10.21 (bs, 1 H, COOH), 8.06-7.96 (m, 1 H, ArH) 7.88-7.72 (m, 2 H, ArH), 7.51-7.32 (m, 4 H, ArH), 5.61 (s, 1 H, one proton of CH<sub>2</sub>=), 5.34 (s, 1 H, one proton of CH<sub>2</sub>=), 3.55 (s, 2 H, CH<sub>2</sub>).

### 3. Synthesis of 3-Benzyl-3-butenic Acid (**2d**, mbky-7-113):

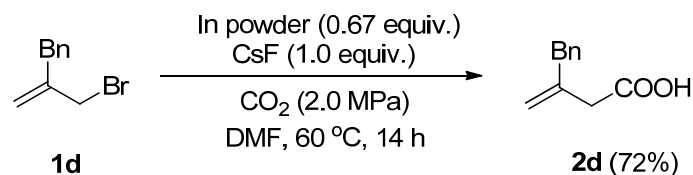

The reaction of **1d** (316.1 mg, 1.50 mmol), indium powder (114.8 mg, 1.00 mmol), CsF (227.0 mg, 1.49 mmol) and CO<sub>2</sub> in 5 mL of DMF afforded 189.5 mg of **2d**<sup>3</sup> (72%, eluent: petroleum ether/ethyl acetate = 5/1 → dichloromethane / methanol = 80/1) as a colorless oil: <sup>1</sup>H NMR (300 MHz, CDCl<sub>3</sub>) δ 9.11 (bs, 1 H, COOH), 7.40-6.70 (m, 5 H, ArH), 5.04 (s, 1 H, one proton of CH<sub>2</sub>=), 5.00 (s, 1 H, one proton of CH<sub>2</sub>=), 3.48 (s, 2 H, CH<sub>2</sub>Ph), 3.02 (s, 2 H, CH<sub>2</sub>); <sup>13</sup>C NMR (75 MHz, CDCl<sub>3</sub>) δ 177.8, 141.2, 138.5, 129.1, 128.4, 126.4, 116.3, 42.6, 40.6; MS (m/z) 176 (M<sup>+</sup>, 85.22), 131 (100); IR (neat, cm<sup>-1</sup>) 3085, 3063, 3029, 2922, 1707, 1650, 1603, 1495, 1454, 1432, 1415, 1332, 1290, 1255, 1226, 1178, 1075, 1030.

#### 4. Synthesis of 3-(4-Tolyl)-3-butenic Acid (**2e**, mbky-8-096):

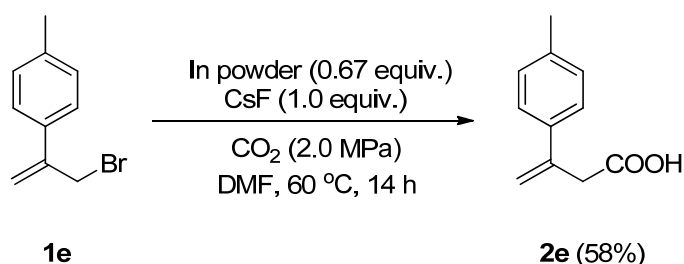

The reaction of **1e** (316.5 mg, 1.50 mmol), indium powder (114.9 mg, 1.00 mmol), CsF (227.3 mg, 1.50 mmol), and CO<sub>2</sub> in 5 mL of DMF afforded 153.5 mg of **2e**<sup>3</sup> (58%, eluent: petroleum ether/ethyl acetate = 5/1 → dichloromethane / methanol = 80/1) as a white solid: sublimation observed at 99 °C, m.p. 112-113 °C (petroleum ether/ ethyl acetate) (Lit.<sup>3a</sup> m.p.: 106-107 °C): <sup>1</sup>H NMR (300 MHz, CDCl<sub>3</sub>) δ 10.27 (bs, 1 H, COOH), 7.32 (d, *J* = 8.1 Hz, 2 H, ArH), 7.13 (d, *J* = 8.1 Hz, 2 H, ArH), 5.54 (s, 1 H, one proton of CH<sub>2</sub>=), 5.19 (s, 1 H, one proton of CH<sub>2</sub>=), 3.51 (s, 2 H, CH<sub>2</sub>), 2.33 (s, 3 H, CH<sub>3</sub>); <sup>13</sup>C NMR (75 MHz, CDCl<sub>3</sub>) δ 177.9, 139.9, 137.7, 136.4, 129.1, 125.5, 115.9, 40.9, 21.1; MS (m/z) 176 (M<sup>+</sup>, 47.58), 91 (100); IR (neat, cm<sup>-1</sup>) 2986, 2971, 2919, 1689, 1631, 1513, 1418, 1346, 1305, 1228, 1053.

## 5. Synthesis of 3-Hexyl-3-butenic Acid (**2f**, mbky-7-121, mbky-8-125):

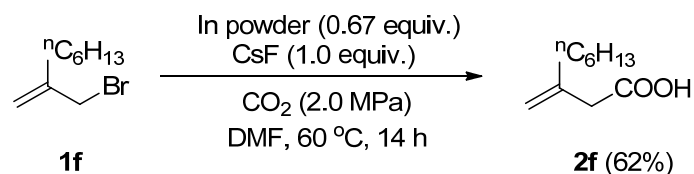

The reaction of **1f** (244.2 mg, 1.19 mmol), indium powder (91.1 mg, 0.79 mmol), CsF (180.9 mg, 1.19 mmol), and CO<sub>2</sub> in 4 mL of DMF afforded 126.4 mg of **2f** (62%, eluent: petroleum ether/ethyl acetate = 5/1 → dichloromethane / methanol = 80/1) as a colorless oil: <sup>1</sup>H NMR (300 MHz, CDCl<sub>3</sub>) δ 11.29 (bs, 1 H, COOH), 4.96 (s, 1 H, one proton of CH<sub>2</sub>=), 4.93 (s, 1 H, one proton of CH<sub>2</sub>=), 3.08 (s, 2 H, CH<sub>2</sub>CO), 2.12 (t, *J* = 7.5 Hz, 2 H, CH<sub>2</sub>), 1.55-1.16 (m, 8 H, 4 × CH<sub>2</sub>), 0.88 (t, *J* = 6.6 Hz, 3 H, CH<sub>3</sub>); <sup>13</sup>C NMR (75 MHz, CDCl<sub>3</sub>) δ 178.2, 142.0, 114.0, 41.6, 35.8, 31.7, 28.9, 27.3, 22.6, 14.1; MS (ESI) 169 [(M-H)<sup>-</sup>]; IR (neat, cm<sup>-1</sup>) 2958, 2929, 2858, 1711, 1649, 1408, 1295, 1218, 1155; HRMS (ESI) calcd. for C<sub>10</sub>H<sub>18</sub>O<sub>2</sub> [(M-H)<sup>-</sup>]: 169.1234; Found: 169.1231.

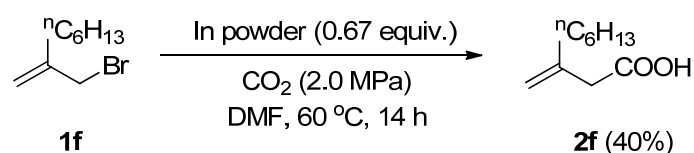

The reaction of **1f** (307.8 mg, 1.50 mmol), indium powder (114.8 mg, 1.00 mmol), and CO<sub>2</sub> in 5 mL of DMF afforded 102.7 mg of **2f** (40%, eluent: petroleum ether/ethyl acetate = 5/1 → dichloromethane / methanol = 80/1) as a yellow oil: <sup>1</sup>H NMR (300 MHz, CDCl<sub>3</sub>) δ 9.70 (bs, 1 H, COOH), 4.96 (s, 1 H, one proton of CH<sub>2</sub>=), 4.95 (s, 1 H, one proton of CH<sub>2</sub>=), 3.08 (s, 2 H, CH<sub>2</sub>CO), 2.12 (t, *J* = 7.2 Hz, 2 H, CH<sub>2</sub>), 1.52-1.20 (m, 8 H, 4 × CH<sub>2</sub>), 0.88 (t, *J* = 6.8 Hz, 3 H, CH<sub>3</sub>).

## 6. Synthesis of 3-(4-Fluorophenyl)-3-butenic Acid (**2k**, mbky-7-112):

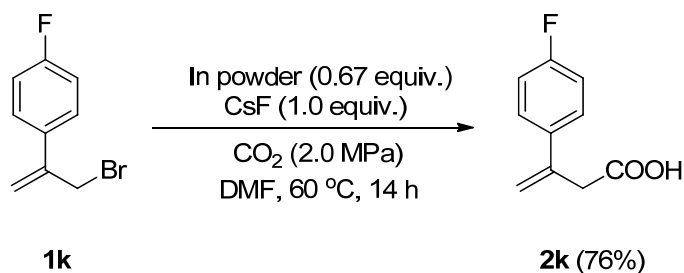



The reaction of **1k** (322.6 mg, 1.50 mmol), indium powder (114.9 mg, 1.00 mmol), CsF (227.6 mg, 1.50 mmol), and CO<sub>2</sub> in 5 mL of DMF afforded 204.8 mg of **2k**<sup>3c</sup> (76%, eluent: petroleum ether/ethyl acetate = 5/1 → dichloromethane / methanol = 30/1) as a white solid: m.p. 66-68 °C (petroleum ether/ ethyl acetate) (Lit.<sup>3e</sup> m.p.: 67 °C): <sup>1</sup>H NMR (300 MHz, CDCl<sub>3</sub>) δ 10.80 (bs, 1 H, COOH), 7.50-7.30 (m, 2 H, ArH), 7.10-6.90 (m, 2 H, ArH), 5.51 (s, 1 H, one proton of CH<sub>2</sub>=), 5.23 (s, 1 H, one proton of CH<sub>2</sub>=), 3.51 (s, 2 H, CH<sub>2</sub>); <sup>13</sup>C NMR (75 MHz, CDCl<sub>3</sub>) δ 177.8, 162.5 (d, *J* = 245.8 Hz), 139.1, 135.4 (d, *J* = 3.4 Hz), 127.4 (d, *J* = 8.0 Hz), 116.8, 115.3 (d, *J* = 21.4 Hz), 41.0; <sup>19</sup>F NMR (282 MHz, CDCl<sub>3</sub>) δ -114.8; MS (*m/z*) 180 (*M*<sup>+</sup>, 99.1), 109 (100); IR (neat, cm<sup>-1</sup>) 3034, 2927, 2853, 1715, 1704, 1631, 1602, 1510, 1416, 1341, 1300, 1225, 1164, 1111, 1014.

## 7. Synthesis of 3-(4-Chlorophenyl)-3-butenic Acid (**2l**, mbky-9-011):

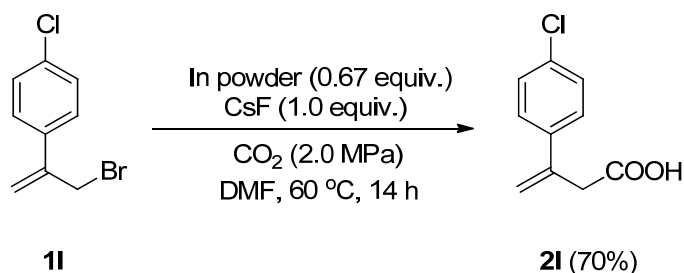

The reaction of **1l** (347.4 mg, 1.50 mmol), indium powder (114.8 mg, 1.00 mmol), CsF (227.6 mg, 1.50 mmol), and CO<sub>2</sub> in 5 mL of DMF afforded 206.0 mg of **2l**<sup>3c</sup> (70%, eluent: petroleum ether/ethyl acetate = 5/1 → dichloromethane / methanol = 80/1) as a white solid: m.p. 123-124 °C (petroleum ether/ ethyl acetate): <sup>1</sup>H NMR (400 MHz, CDCl<sub>3</sub>) δ 7.40-7.20 (m, 4 H, ArH), 5.56 (s, 1 H, one proton of CH<sub>2</sub>=), 5.27 (s, 1 H, one proton of CH<sub>2</sub>=), 3.52 (s, 2 H, CH<sub>2</sub>); <sup>13</sup>C NMR (100 MHz, CDCl<sub>3</sub>) δ 176.9, 139.1, 137.8, 133.8, 128.6, 127.1, 117.5, 40.7; MS (*m/z*) 198 (<sup>37</sup>Cl, *M*<sup>+</sup>, 16.7), 196 (<sup>35</sup>Cl, *M*<sup>+</sup>, 50.1), 115 (100); IR (neat, cm<sup>-1</sup>) 3056, 2919, 2851, 2744, 2620, 1691, 1633, 1492, 1420, 1349, 1311, 1229, 1104, 1089, 1012.

## 8. Synthesis of 3-(4-Trifluoromethylphenyl)-3-butenic Acid (**2m**, mbky-7-107):

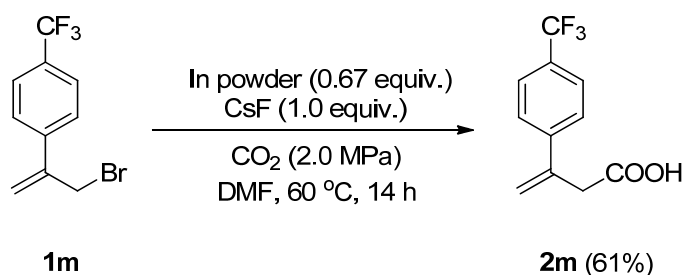

The reaction of **1m** (397.6 mg, 1.50 mmol), indium powder (114.8 mg, 1.00 mmol), CsF (227.9 mg, 1.50 mmol), and CO<sub>2</sub> in 5 mL of DMF afforded 211.5 mg of **2m**<sup>3c</sup> (61%, eluent: petroleum ether/ethyl acetate = 5/1 → dichloromethane / methanol = 30/1) as a white solid: sublimation observed at 100-101 °C, m.p. 105-106 °C (petroleum ether/ ethyl acetate): <sup>1</sup>H NMR (300 MHz, CDCl<sub>3</sub>) δ 8.73 (bs, 1 H, COOH), 7.59 (d, *J* = 8.4 Hz, 2 H, ArH), 7.52 (d, *J* = 8.4 Hz, 2 H, ArH), 5.64 (s, 1 H, one proton of CH<sub>2</sub>=), 5.36 (s, 1 H, one proton of CH<sub>2</sub>=), 3.56 (s, 2 H, CH<sub>2</sub>); <sup>13</sup>C NMR (75 MHz, CDCl<sub>3</sub>) δ 177.2, 142.9 (d, *J* = 1.3 Hz), 139.1, 129.9 (q, *J* = 33.7 Hz), 126.1, 125.4 (q, *J* = 3.9 Hz), 124.1 (q, *J* = 270.1 Hz), 119.0, 40.7; <sup>19</sup>F NMR (282 MHz, CDCl<sub>3</sub>) δ -63.1; MS (*m/z*) 230 (*M*<sup>+</sup>, 45.19), 44 (100); IR (neat, cm<sup>-1</sup>) 3663, 2985, 2972, 2902, 1694, 1407, 1323, 1227, 1168, 1120, 1102, 1066, 1016.

## 9. Synthesis of 3-[4-(Ethoxycarbonyl)phenyl]-3-butenic Acid (**2n**, mbky-7-135, 9-117):

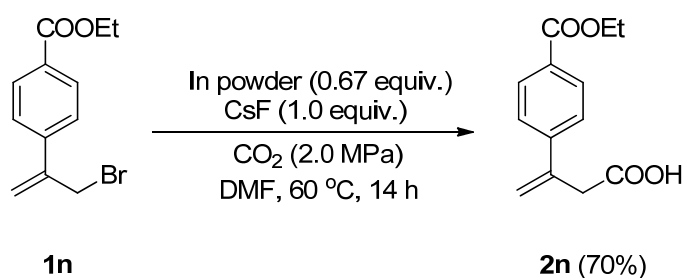

The reaction of **1n** (403.7 mg, 1.50 mmol), indium powder (114.9 mg, 1.00 mmol), CsF (226.9 mg, 1.49 mmol), and CO<sub>2</sub> in 5 mL of DMF afforded 247.2 mg of **2n** (70%, eluent: petroleum ether/ethyl acetate = 7/1 → dichloromethane / methanol = 30/1) as a white solid: m.p. 88-90 °C (petroleum ether/ ethyl acetate): <sup>1</sup>H NMR (300 MHz, CDCl<sub>3</sub>) δ 8.05-7.94 (m, 2 H, ArH), 7.52-7.45 (m, 2 H ArH), 5.66 (s, 1 H, one proton of CH<sub>2</sub>=), 5.36 (s, 1 H, one proton of CH<sub>2</sub>=), 4.37 (q, *J* = 7.2 Hz, 2 H, OCH<sub>2</sub>), 3.56 (s,

2 H, CH<sub>2</sub>), 1.39 (t,  $J = 7.1$  Hz, 3 H, CH<sub>3</sub>); <sup>1</sup>H NMR (300 MHz, DMSO-*D*<sub>6</sub>)  $\delta$  12.33 (bs, 1 H, -COOH), 7.96-7.88 (m, 2 H, ArH), 7.65-7.57 (m, 2 H ArH), 5.69 (s, 1 H, one proton of CH<sub>2</sub>=), 5.35 (s, 1 H, one proton of CH<sub>2</sub>=), 4.30 (q,  $J = 7.2$  Hz, 2 H, OCH<sub>2</sub>), 3.55 (s, 2 H, CH<sub>2</sub>), 1.31 (t,  $J = 6.9$  Hz, 3 H, CH<sub>3</sub>); <sup>13</sup>C NMR (75 MHz, CDCl<sub>3</sub>)  $\delta$  177.2, 166.3, 143.7, 139.4, 129.8, 125.7, 118.8, 61.0, 40.6, 14.3; MS ( $m/z$ ) 234 ( $M^+$ , 39.68), 189 (100); <sup>13</sup>C NMR (75 MHz, DMSO-*D*<sub>6</sub>)  $\delta$  172.2, 165.5, 144.1, 140.4, 129.2, 128.9, 125.9, 118.2, 60.7, 40.3, 14.0 ; IR (neat, cm<sup>-1</sup>) 2926, 2855, 1707, 1689, 1607, 1405, 1282, 1222, 1185, 1127, 1113, 1022; Anal. calcd for C<sub>13</sub>H<sub>14</sub>O<sub>4</sub>: C 66.66, H 6.02; found: C 66.35, H 6.10.

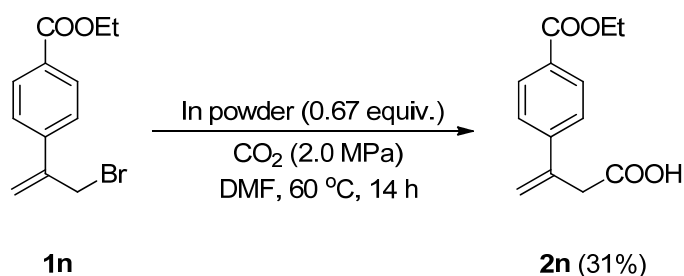

The reaction of **1n** (404.2 mg, 1.50 mmol), indium powder (115.0 mg, 1.00 mmol), and CO<sub>2</sub> in 5 mL of DMF afforded 110.0 mg of **2n** (31%, eluent: petroleum ether/ethyl acetate = 7/1 → dichloromethane / methanol = 30/1) as a white solid: m.p. 88-90 °C (petroleum ether/ ethyl acetate): <sup>1</sup>H NMR (300 MHz, CDCl<sub>3</sub>)  $\delta$  8.05-7.96 (m, 2 H, ArH), 7.52-7.45 (m, 2 H ArH), 5.67 (s, 1 H, one proton of CH<sub>2</sub>=), 5.36 (s, 1 H, one proton of CH<sub>2</sub>=), 4.37 (q,  $J = 6.9$  Hz, 2 H, OCH<sub>2</sub>), 3.57 (s, 2 H, CH<sub>2</sub>), 1.39 (t,  $J = 7.2$  Hz, 3 H, CH<sub>3</sub>).

#### 10. Synthesis of 3-(3-Cyanophenyl)-3-butenic Acid (**2o**, mbky-8-156):

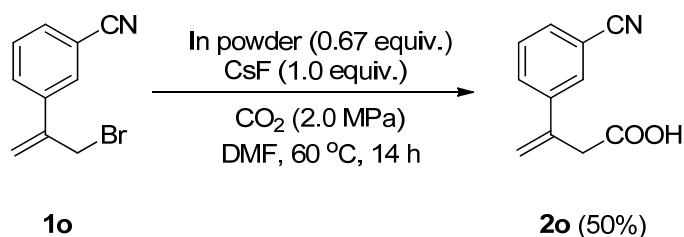

The reaction of **1o** (333.3 mg, 1.50 mmol), indium powder (115.0 mg, 1.00 mmol), CsF (228.2 mg, 1.50 mmol), and CO<sub>2</sub> in 5 mL of DMF afforded 139.8 mg of **2o** (50%,

eluent: petroleum ether/ethyl acetate = 5/1→ dichloromethane / methanol = 30/1) as a white solid: m.p. 81-82 °C (petroleum ether/ ethyl acetate);  $^1\text{H}$  NMR (300 MHz,  $\text{CDCl}_3$ )  $\delta$  8.74 (bs, 1 H, COOH), 7.70 (s, 1 H, ArH), 7.65 (d,  $J$  = 8.1 Hz, 1 H, ArH), 7.58 (d,  $J$  = 7.8 Hz, 1 H, ArH), 7.45 (t,  $J$  = 7.8 Hz, 1 H, ArH), 5.62 (s, 1 H, one proton of  $\text{CH}_2=$ ), 5.39 (s, 1 H, one proton of  $\text{CH}_2=$ ), 3.55 (s, 2 H,  $\text{CH}_2$ );  $^{13}\text{C}$  NMR (75 MHz,  $\text{CDCl}_3$ )  $\delta$  176.7, 140.8, 138.4, 131.3, 130.1, 129.5, 129.3, 119.3, 118.6, 112.7, 40.5; MS ( $m/z$ ) 187 ( $\text{M}^+$ , 54.85), 117 (100); IR (neat,  $\text{cm}^{-1}$ ) 2922, 2852, 2230, 1698, 1635, 1487, 1416, 1399, 1341, 1311, 1296, 1277, 1225; HRMS calcd. for  $\text{C}_{11}\text{H}_9\text{NO}_2$  ( $\text{M}^+$ ): 187.0633; Found: 187.0632.

#### 11. Synthesis of 3-(4-(2-methyl-1,3-dioxolan-2-yl)phenyl)-3-butenic Acid (**2p**, mbky-8-155):

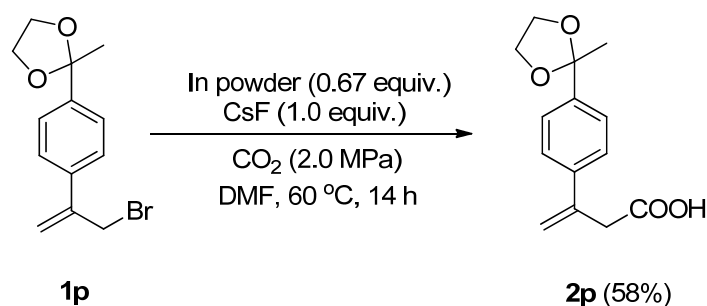

The reaction of **1p** (424.9 mg, 1.50 mmol), indium powder (114.8 mg, 1.00 mmol), CsF (228.0 mg, 1.50 mmol), and  $\text{CO}_2$  in 5 mL of DMF afforded 217.7 mg of **2p** (58%, eluent: petroleum ether/ethyl acetate = 6/1→ dichloromethane / methanol = 30/1) as a colorless oil:  $^1\text{H}$  NMR (300 MHz,  $\text{CDCl}_3$ )  $\delta$  9.60 (bs, 1 H, COOH), 7.50-7.30 (m, 4 H, ArH), 5.59 (s, 1 H, one proton of  $\text{CH}_2=$ ), 5.26 (s, 1 H, one proton of  $\text{CH}_2=$ ), 4.10-3.90 (m, 2 H,  $\text{OCH}_2$ ), 3.85-3.70 (m, 2 H,  $\text{OCH}_2$ ), 3.54 (s, 2 H,  $\text{CH}_2\text{CO}$ ), 1.64 (s, 3 H,  $\text{CH}_3$ );  $^{13}\text{C}$  NMR (75 MHz,  $\text{CDCl}_3$ )  $\delta$  177.3, 142.9, 139.7, 138.8, 125.5, 125.4, 116.9, 108.7, 64.4, 40.7, 27.43, 27.40; MS ( $m/z$ ) 248 ( $\text{M}^+$ , 3.31), 233 (100); IR (neat,  $\text{cm}^{-1}$ ) 2995, 2855, 1697, 1628, 1450, 1423, 1373, 1291, 1255, 1235, 1194, 1175, 1101, 1078, 1040, 1015; HRMS calcd. for  $\text{C}_{14}\text{H}_{16}\text{O}_4$  ( $\text{M}^+$ ): 248.1049; Found: 248.1051.

#### Carboxylation of Commercially Available Allylic Bromides with $\text{CO}_2$ Followed

by Benzyl Esterification (Scheme 3).

### 1. Synthesis of Benzyl 3-methylbut-3-enoate (**3g**, mbky-7-180):

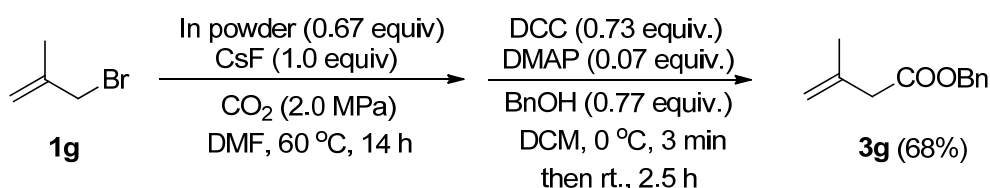

To a 25 mL autoclave equipped with a magnetic stirring bar was added CsF (228.2 mg, 1.50 mmol), which was stored in a glove box. Then indium powder (114.8 mg, 1.00 mmol), **1g** (Adamas, purity: 97%, 208.9 mg, 1.50 mmol), and DMF (5 mL) in the air were added. The autoclave was pressurized to 2 MPa with CO<sub>2</sub> and stirred at 60 °C for 14 h. After slowly releasing the pressure, the resulting suspension was transferred into a 50 mL funnel flask with a glass dropper. The autoclave was washed with ethyl acetate (5 mL × 2). The combined mixture was quenched with 20 mL of 3 M HCl. The aqueous layer was extracted with ethyl acetate (10 mL × 4). The combined organic layer was washed with 30 mL of brine, dried over anhydrous Na<sub>2</sub>SO<sub>4</sub>, filtrated, and concentrated to afford the crude product acid.

To a 25 mL Schlenk tube were added BnOH (0.12 mL, density: 1.049, 1.16 mmol), 1 mL of DCM, DMAP (13.0 mg, 0.11 mmol) and the crude product acid prepared above in 4 mL of DCM sequentially. The resulting solution was cooled with a bath of ice-water, which was followed by the addition of a solution of DCC (228.2 mg, 1.10 mmol) in 1 mL of DCM within 3 minutes. Then the resulting mixture was allowed to warm to room temperature and the esterification reaction completed after 2.5 h as monitored by TLC. DCM (30 mL) was added into the suspension and the resulting mixture was filtered through a short pad of silica gel (300-400 mesh) eluted with DCM (10 mL × 2) and concentrated. The crude product was purified by column chromatography on silica gel to afford 195.3 mg of **3g**<sup>4a</sup> (68%, eluent: petroleum ether/diethyl ether = 80/1) as a colorless oil: <sup>1</sup>H NMR (300 MHz, CDCl<sub>3</sub>) δ 7.41-7.27 (m, 5 H, ArH), 5.14 (s, 2 H, CH<sub>2</sub>Ph), 4.94-4.88 (m, 1 H, one proton of CH<sub>2</sub>=), 4.88-4.83 (m, 1 H, one proton of CH<sub>2</sub>=), 3.09 (s, 2 H, =CCH<sub>2</sub>), 1.80 (s, 3 H, CH<sub>3</sub>); <sup>13</sup>C NMR (75 MHz, CDCl<sub>3</sub>) δ 171.2, 138.4, 135.9, 128.5, 128.19, 128.16, 114.8, 66.4,

43.4, 22.5; MS (m/z) 190 ( $M^+$ , 0.69), 91 (100); IR (neat,  $\text{cm}^{-1}$ ) 1737, 1652, 1498, 1377, 1331, 1283, 1256, 1234, 1149, 1028.

## 2. Synthesis of Benzyl 2-Cyclohexene-1-carboxylate (**3h**, mbky-8-004):

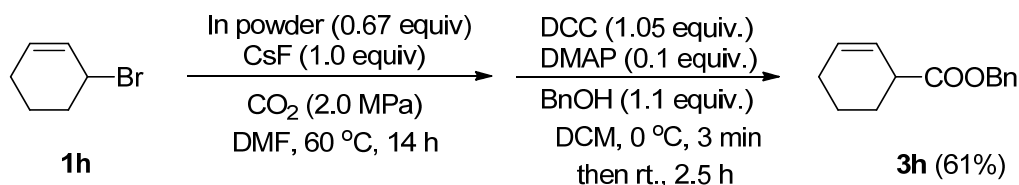

**Typical procedure II:** To a 25 mL autoclave equipped with a magnetic stirring bar was added CsF (228.1 mg, 1.50 mmol), which was stored in a glove box. Then indium powder (114.8 mg, 1.00 mmol), **1h** (Acros, purity: 95%, 254.3 mg, 1.50 mmol) and DMF (5 mL) were added in the air. The autoclave was pressurized to 2 MPa with CO<sub>2</sub> and stirred at 60 °C for 14 h. After slowly releasing the pressure, the resulting suspension was transferred into a 50 mL funnel flask with a glass dropper. The autoclave was washed with ethyl acetate (5 mL  $\times$  2) and the combined mixture was quenched with 20 mL of 3 M aqueous HCl solution. The aqueous layer was extracted with ethyl acetate (10 mL  $\times$  4). The combined organic layer was washed with 30 mL of brine, dried over anhydrous Na<sub>2</sub>SO<sub>4</sub>, filtrated and concentrated in a 100 mL flask to afford the crude product acid. DCM (5 mL), DMAP (18.5 mg, 0.15 mmol) and BnOH (0.17 mL, 1.65 mmol, density: 1.049) were added sequentially into this flask, which was followed by cooling with a bath of ice-water and the addition of a solution of DCC (228.2 mg, 1.10 mmol) in 1 mL of DCM dropwise within 3 minutes. Then the resulting mixture was allowed to warm to room temperature and the esterification reaction completed after 2.5 h as monitored by TLC. DCM (30 mL) was added into the suspension and the resulting mixture was filtered through a short pad of silica gel (300-400 mesh) eluted with DCM (10 mL  $\times$  2) and concentrated. The crude product was purified by column chromatography on silica gel to afford 198.5 mg of **3h** (61%, eluent: petroleum ether/diethyl ether = 80/1) as a yellow oil: <sup>1</sup>H NMR (300 MHz, CDCl<sub>3</sub>)  $\delta$  7.46-7.27 (m, 5 H, ArH), 5.90-5.73 (m, 2 H, CH=CH), 5.14 (s, 2 H, CH<sub>2</sub>Ph), 3.20-3.10 (m, 1 H, =CCHCO), 2.15-1.68 (m, 5 H, protons of cyclohexene), 1.68-1.49

(m, 1 H, proton of cyclohexene);  $^{13}\text{C}$  NMR (75 MHz,  $\text{CDCl}_3$ )  $\delta$  174.3, 136.1, 129.7, 128.5, 128.1, 128.0, 124.1, 66.2, 41.1, 25.2, 24.6, 20.7; MS ( $m/z$ ) 216 ( $\text{M}^+$ , 1.72), 91 (100); IR (neat,  $\text{cm}^{-1}$ ) 3033, 2937, 1734, 1498, 1455, 1376, 1308, 1212, 1167, 1092, 1022; HRMS (ESI) calcd. for  $\text{C}_{14}\text{H}_{17}\text{O}_2$  [ $(\text{M}+\text{H})^+$ ]: 217.1223; Found: 217.1223.

The following compounds were prepared according to this **Typical Procedure II**.

### 3. Synthesis of Benzyl 2-Methyl-3-butenolate (**3i**, mbky-9-137):

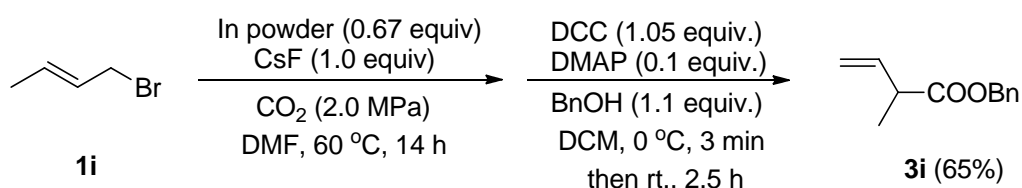

The reaction of allylic bromide **1i** (TCI, purity: 83%, 243.7 mg, 1.50 mmol), indium powder (114.6 mg, 1.00 mmol), CsF (228.3 mg, 1.50 mmol), and  $\text{CO}_2$  in 5 mL of DMF afforded the crude product acid. The esterification reaction of the crude product acid, BnOH (0.17 mL, 1.65 mmol, density: 1.049), DMAP (18.3 mg, 0.15 mmol), and DCC (325.6 mg, 1.58 mmol) in 6 mL of DCM afforded 186.2 mg of **3i**<sup>4b</sup> (65%, eluent: petroleum ether/diethyl ether = 100/1) as a faint yellow oil.  $^1\text{H}$  NMR (300 MHz,  $\text{CDCl}_3$ )  $\delta$  7.41-7.27 (m, 5 H, ArH), 5.94 (ddd,  $J_1 = 17.4$  Hz,  $J_2 = 9.9$  Hz,  $J_3 = 7.5$  Hz, 1 H, =CH), 5.20-5.06 (m, 4 H,  $\text{CH}_2\text{Ph} + \text{CH}_2=$ ), 3.27-3.10 (m, 1 H, CHCO), 1.29 (d,  $J = 7.2$  Hz, 3 H,  $\text{CH}_3$ );  $^{13}\text{C}$  NMR (75 MHz,  $\text{CDCl}_3$ )  $\delta$  174.2, 137.0, 136.0, 128.5, 128.1, 128.0, 116.0, 66.3, 43.7, 16.7; MS ( $m/z$ ) 190 ( $\text{M}^+$ , 2.44), 91 (100); IR (neat,  $\text{cm}^{-1}$ ) 3088, 3066, 3034, 2980, 2937, 1736, 1640, 1498, 1456, 1378, 1326, 1253, 1212, 1155, 1082, 1030.

### 4. Synthesis of Benzyl 2,2'-Dimethylbut-3-enoate (**3j**, mbky-8-001):

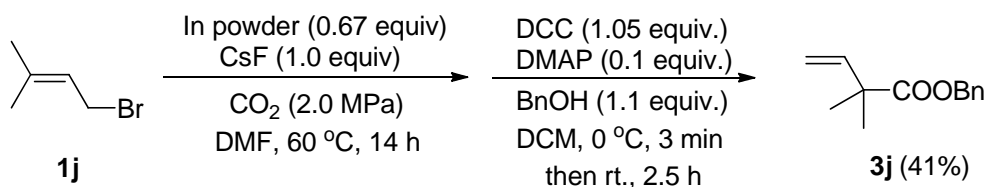

The reaction of **1j** (Alfa-Aesar, purity: 90%, 248.3 mg, 1.50 mmol), indium powder (114.8 mg, 1.00 mmol), CsF (227.9 mg, 1.50 mmol), and CO<sub>2</sub> in 5 mL of DMF afforded the crude acid. The esterification reaction of the crude product acid, BnOH (0.17 mL, 1.65 mmol, density: 1.049), DMAP (18.3 mg, 0.15 mmol), and DCC (325.6 mg, 1.58 mmol) in 6 mL of DCM afforded 126.6 mg of **3j** (41%, eluent: petroleum ether/diethyl ether = 80/1) as a yellow oil: <sup>1</sup>H NMR (300 MHz, CDCl<sub>3</sub>) δ 7.40-7.26 (m, 5 H, ArH), 6.05 (dd, *J*<sub>1</sub> = 17.4 Hz, *J*<sub>2</sub> = 10.5 Hz, 1 H, =CH), 5.15-5.03 (m, 4 H, CH<sub>2</sub>Ph + CH<sub>2</sub>=), 1.33 (s, 6 H, 2 × CH<sub>3</sub>); <sup>13</sup>C NMR (75 MHz, CDCl<sub>3</sub>) δ 176.1, 142.4, 136.2, 128.5, 128.0, 127.7, 113.0, 66.3, 44.9, 24.6, 24.5; MS (ESI) 205 [(M+H)<sup>+</sup>]; IR (neat, cm<sup>-1</sup>) 1732, 1640, 1498, 1461, 1415, 1376, 1261, 1224, 1136; HRMS (ESI) calcd. for C<sub>13</sub>H<sub>17</sub>O<sub>2</sub> [(M+H)<sup>+</sup>]: 205.1223; Found: 205.1221.

## References

- (1) Liu, H.; Qiao, Z.; Jiang, X. *Org. Biomol. Chem.* **2012**, *10*, 7274.
- (2) Mo, J.; Xu, L.; Ruan, J.; Liu, S.; Xiao, J. *Chem. Commun.* **2006**, 42, 3591.
- (3) a) Itoh, K.; Harada, T.; Nagashima, H. *Bull. Chem. Soc. Jpn.* **1991**, *64*, 3746. b) Yamamoto, K.; Ikeda, K.; Yin, L. *J. Organomet. Chem.* **1989**, *370*, 319. c) Sun, X.; Zhou, L.; Wang, C.; Zhang, X. *Angew. Chem., Int. Ed.* **2007**, *46*, 2623. d) Luteri, G. F.; Ford, W. T. *J. Org. Chem.* **1977**, *42*, 820. e) Wiley, R. H.; Plus, V. D. *J. Chem. Eng. Data* **1965**, *10*, 72.
- (4) a) Molander, G. A.; Barcellos, T.; Traister, K. M. *Org. Lett.* **2013**, *15*, 3342. b) M. Taniguchi, M.; Koga, K. Yamada, S. *Chem. Pharm. Bull.* **1972**, *20*, 1438.



mbky-7-094 H  
 spect, CDCl<sub>3</sub>,  
 Mon Apr 15 22:01:36 2013  
 NA = 6  
 F1 = 300.131866 MHz

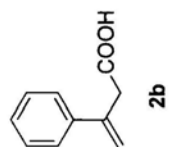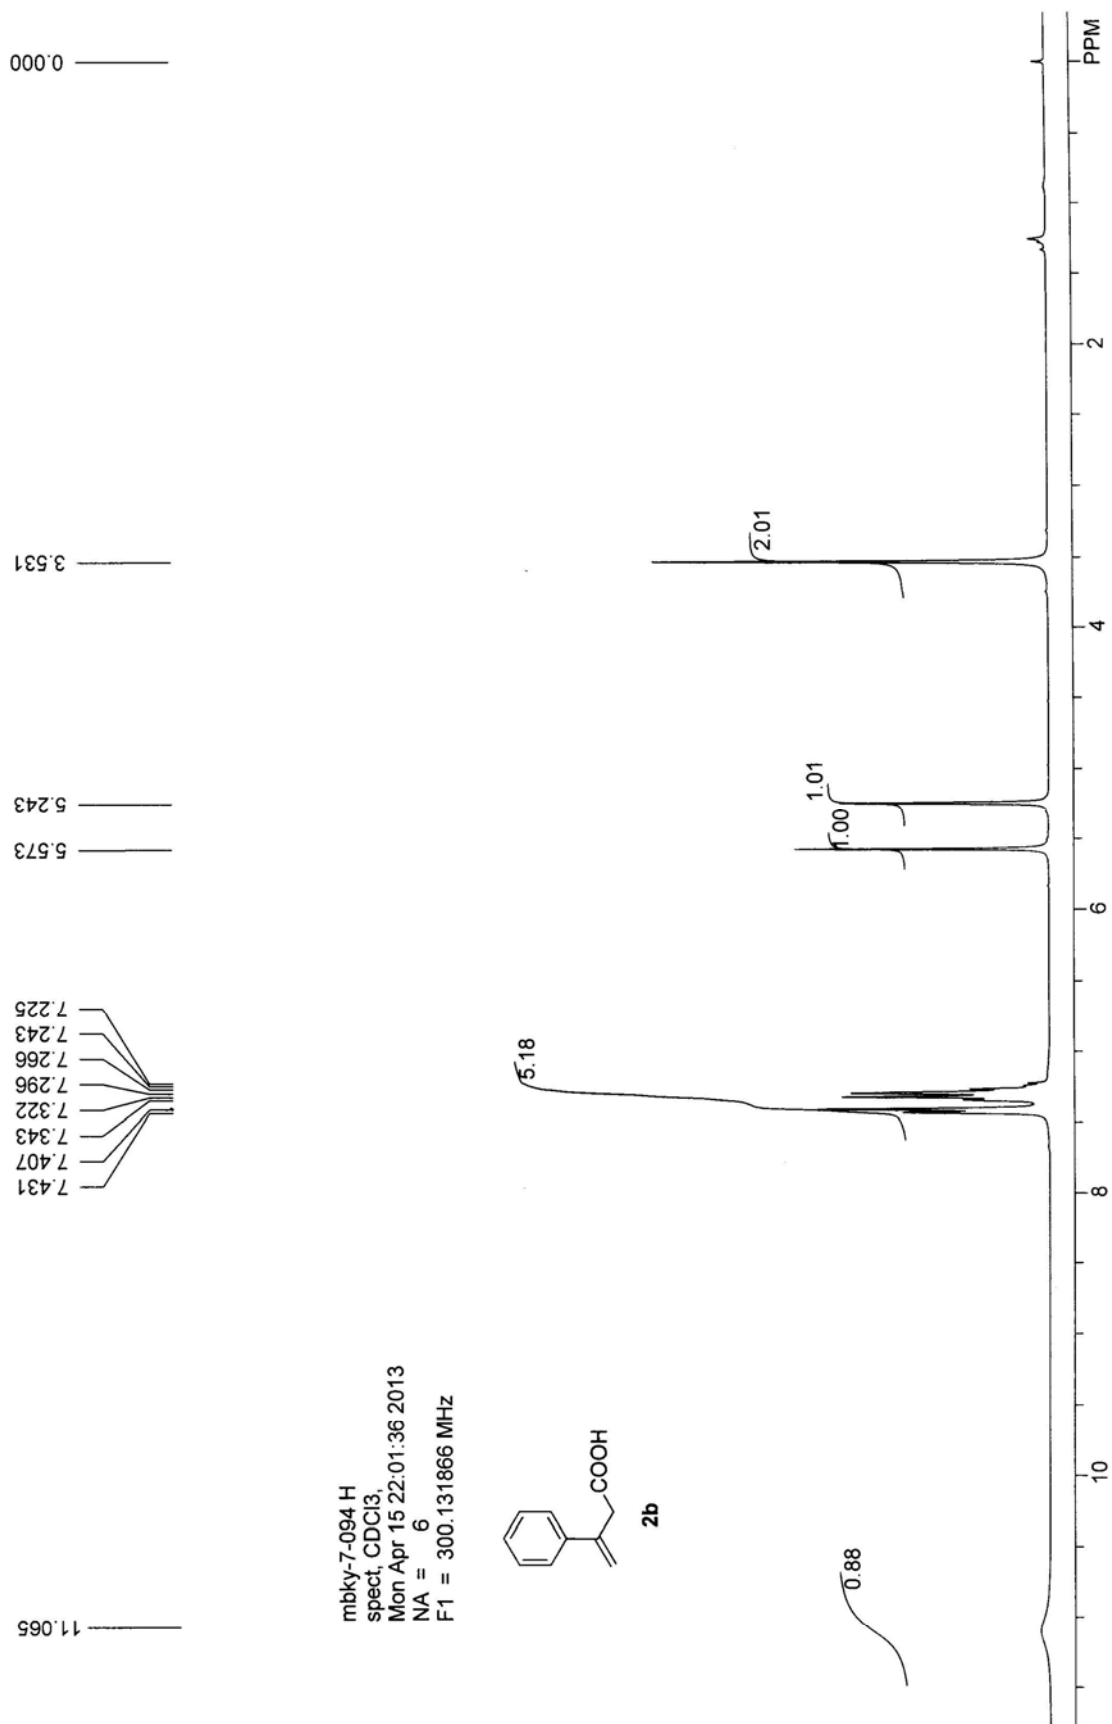

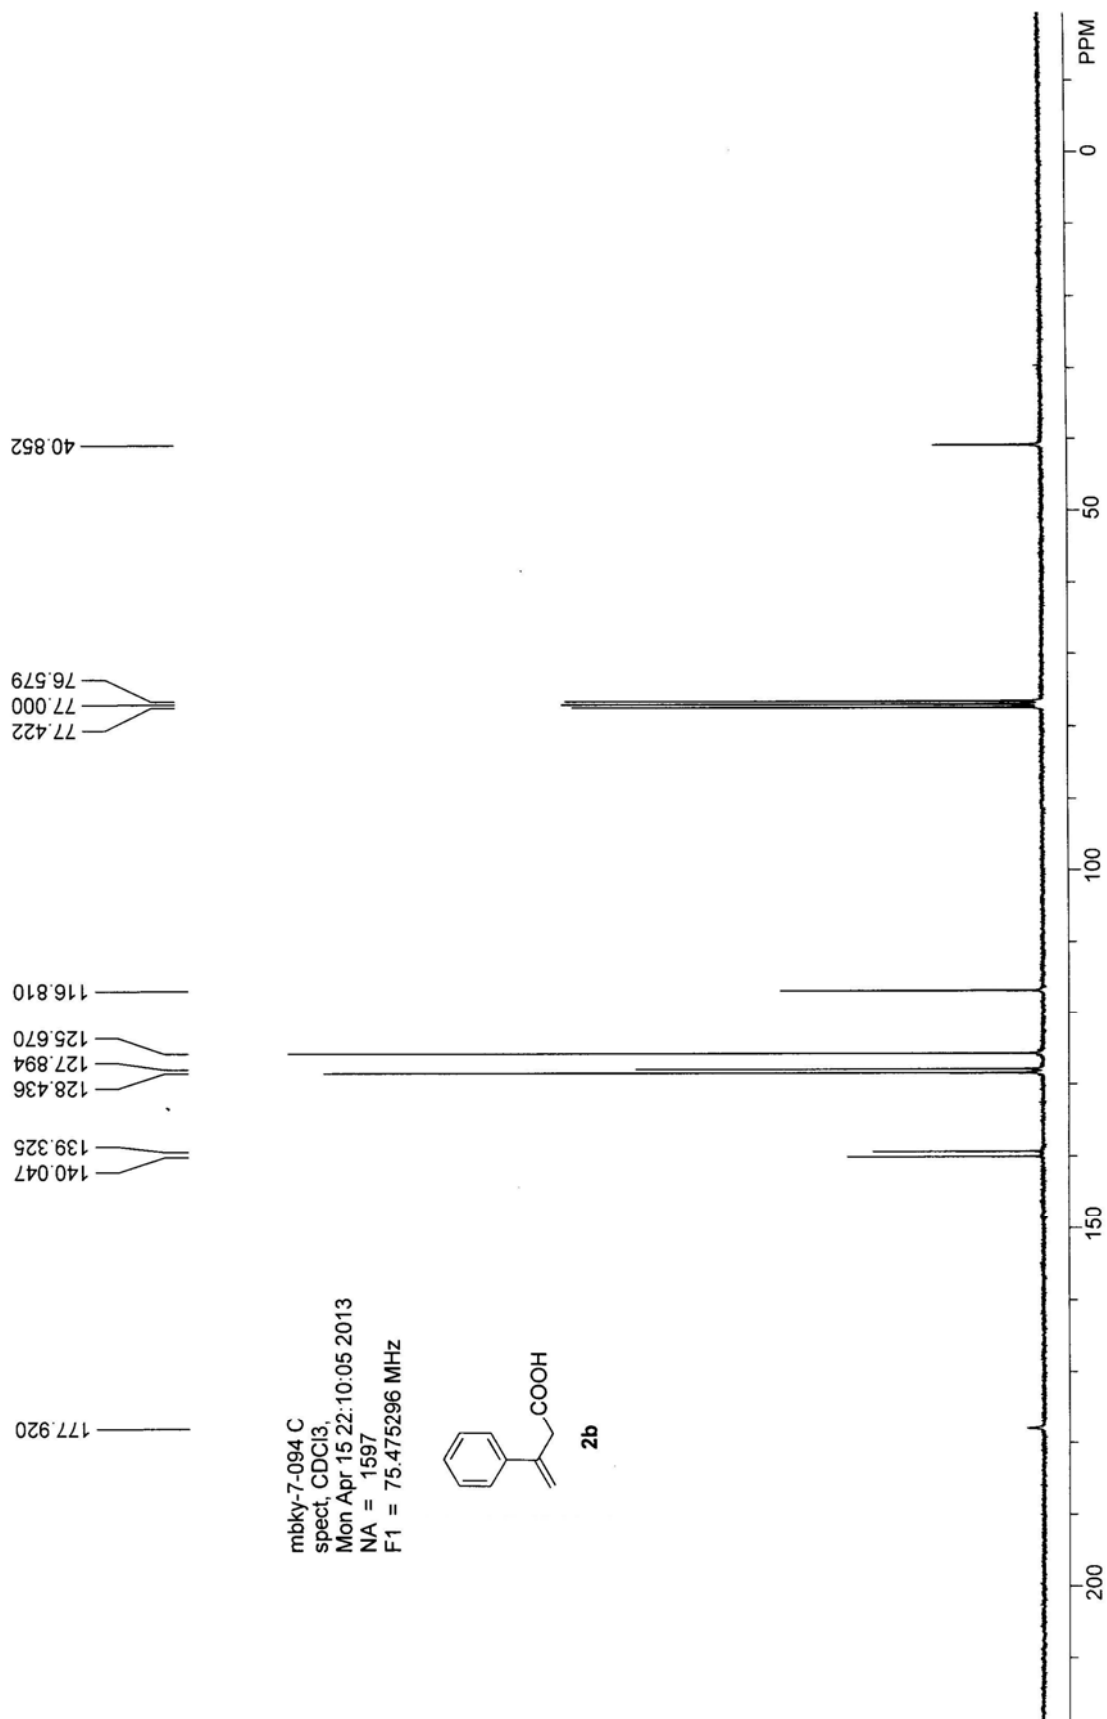

mbky-7-094 C  
spect, CDCl<sub>3</sub>  
Mon Apr 15 22:10:05 2013  
NA = 1597  
F1 = 75.475296 MHz

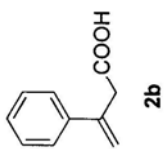

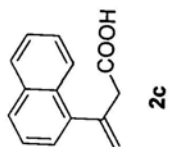

S19

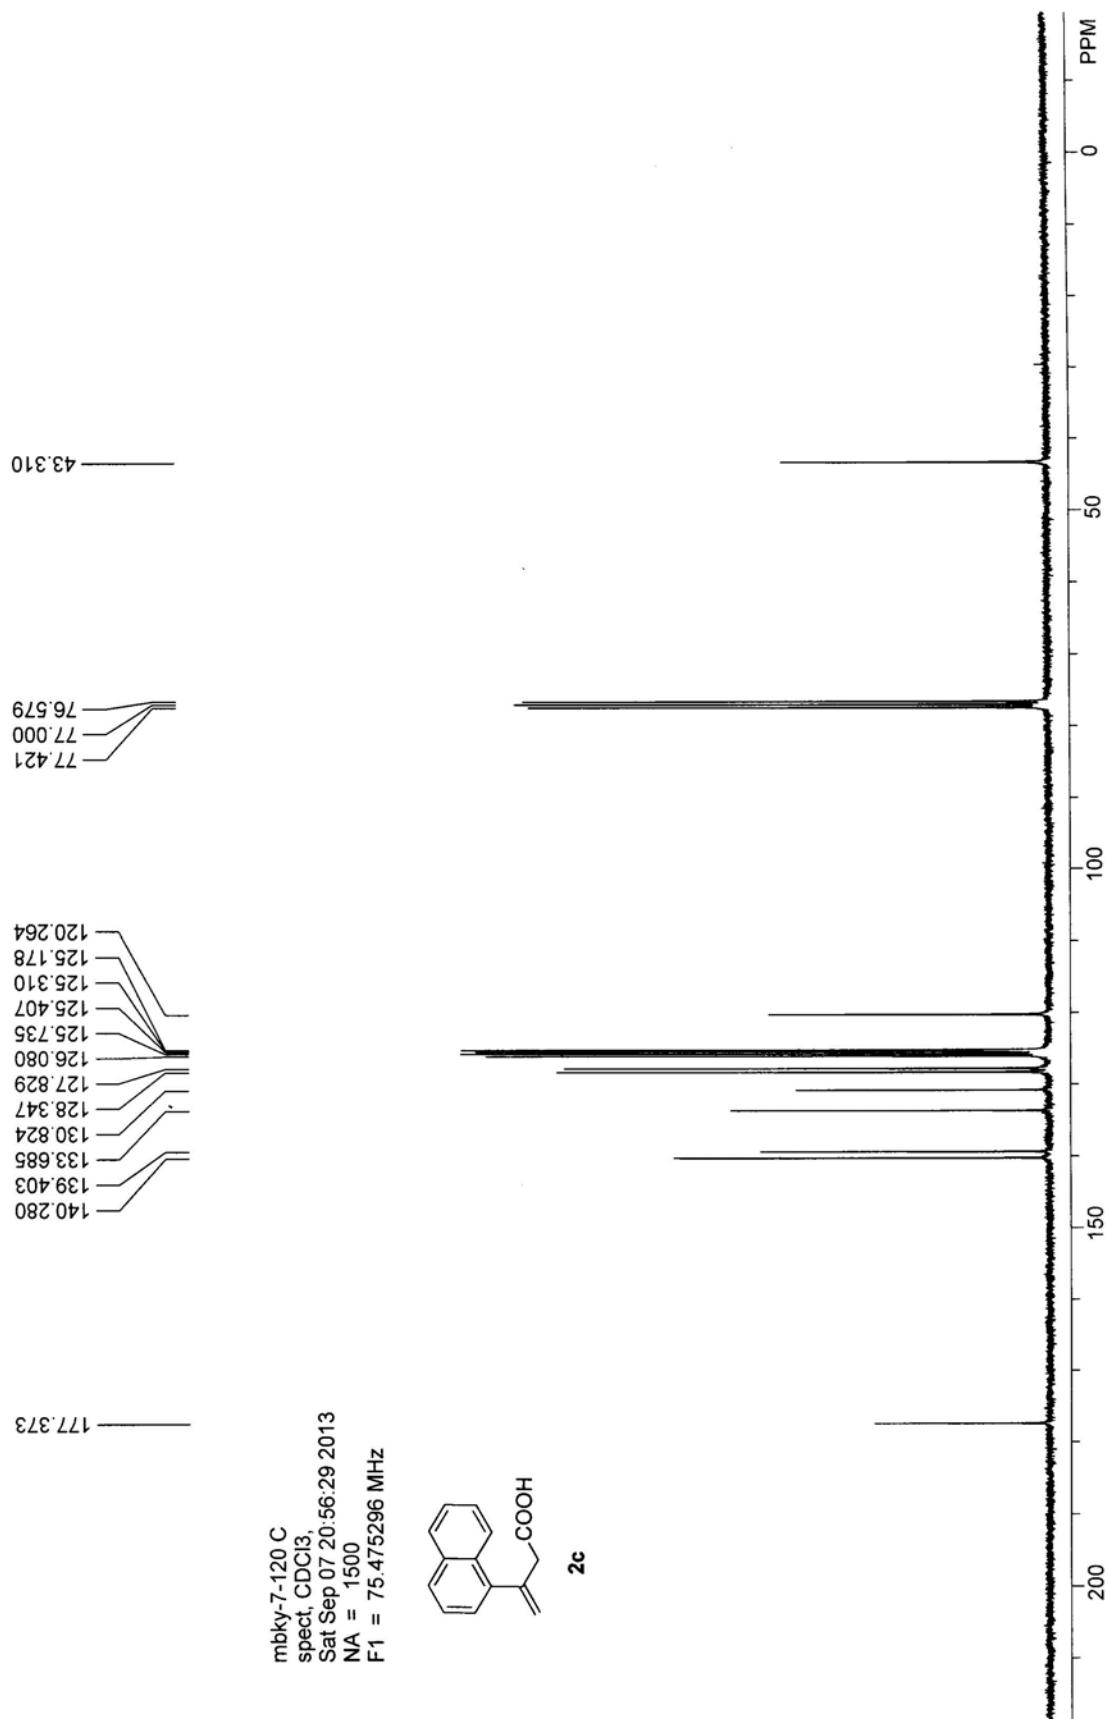

mbky-7-120 C  
 spect, CDCl<sub>3</sub>,  
 Sat Sep 07 20:56:29 2013  
 NA = 1500  
 F1 = 75.475296 MHz

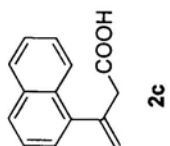

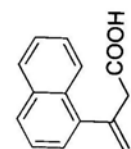

**2c**

mbky-8-079 H  
spect, CDCl<sub>3</sub>,  
Sat Oct 05 15:17:24 2013  
NA = 6  
F1 = 300.131866 MHz

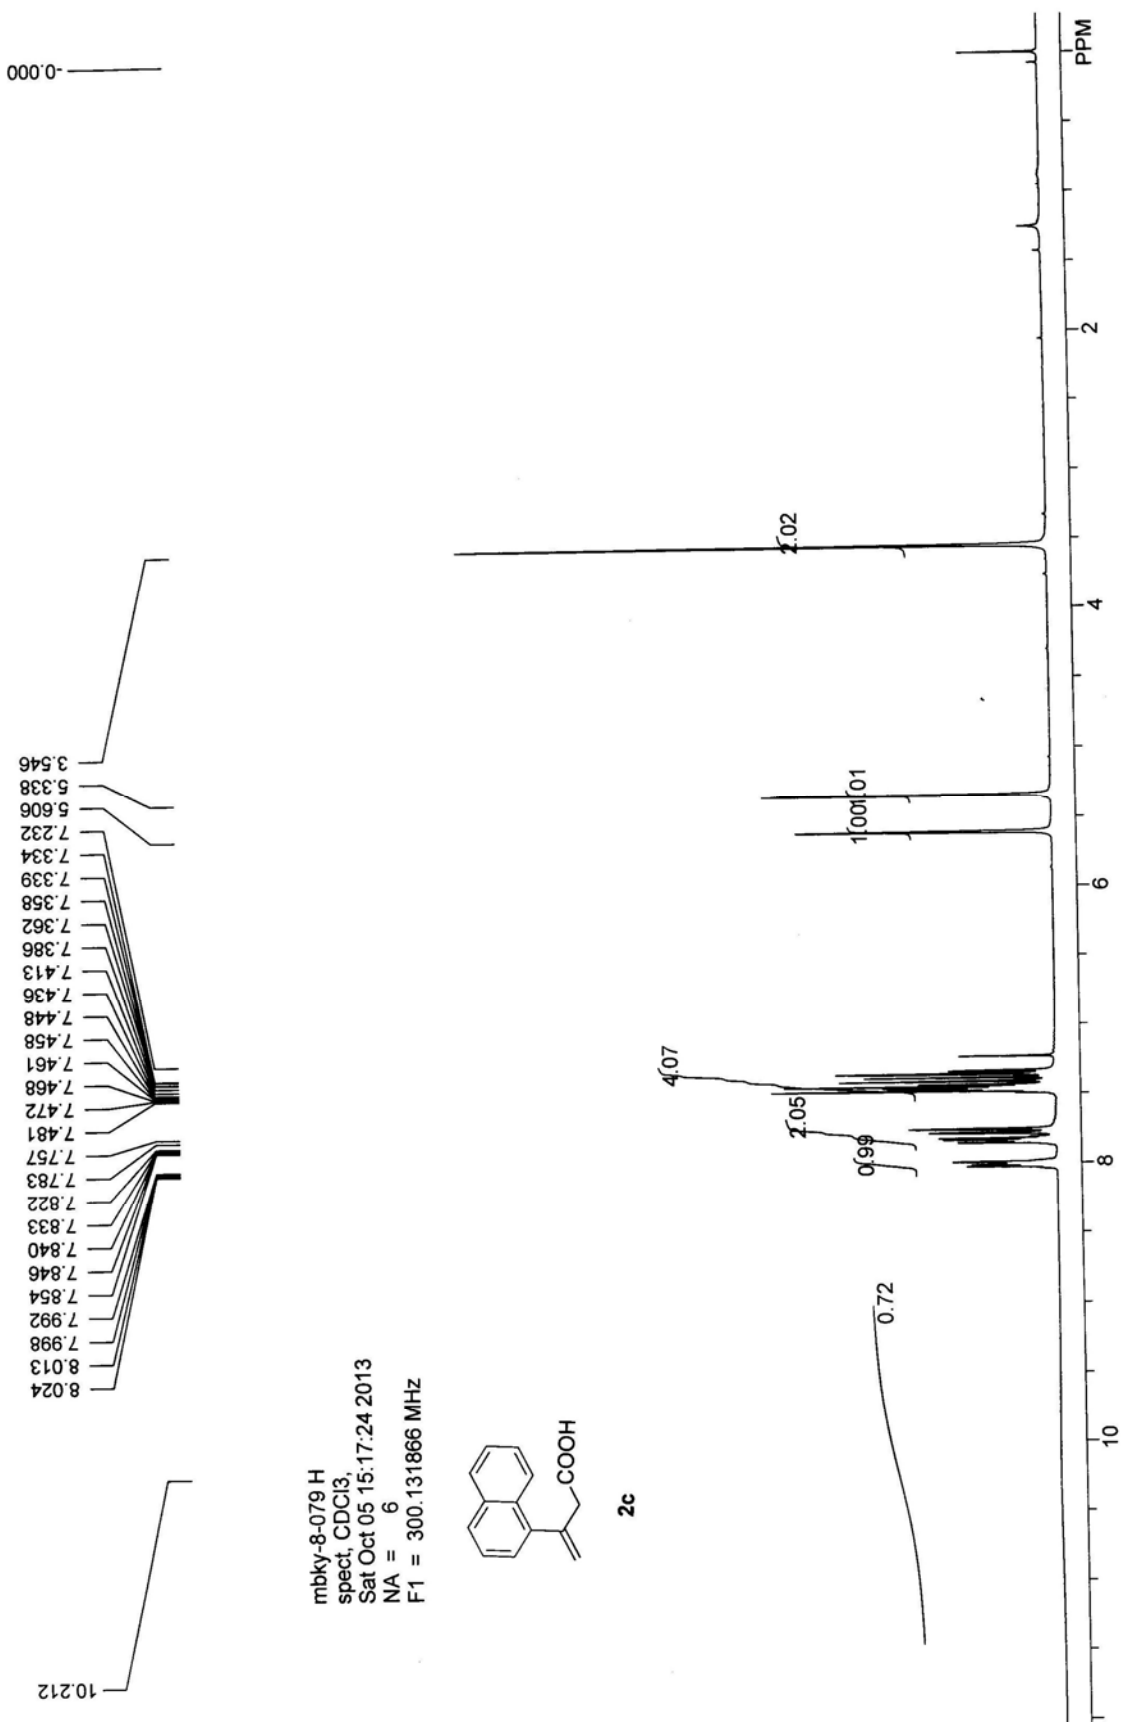

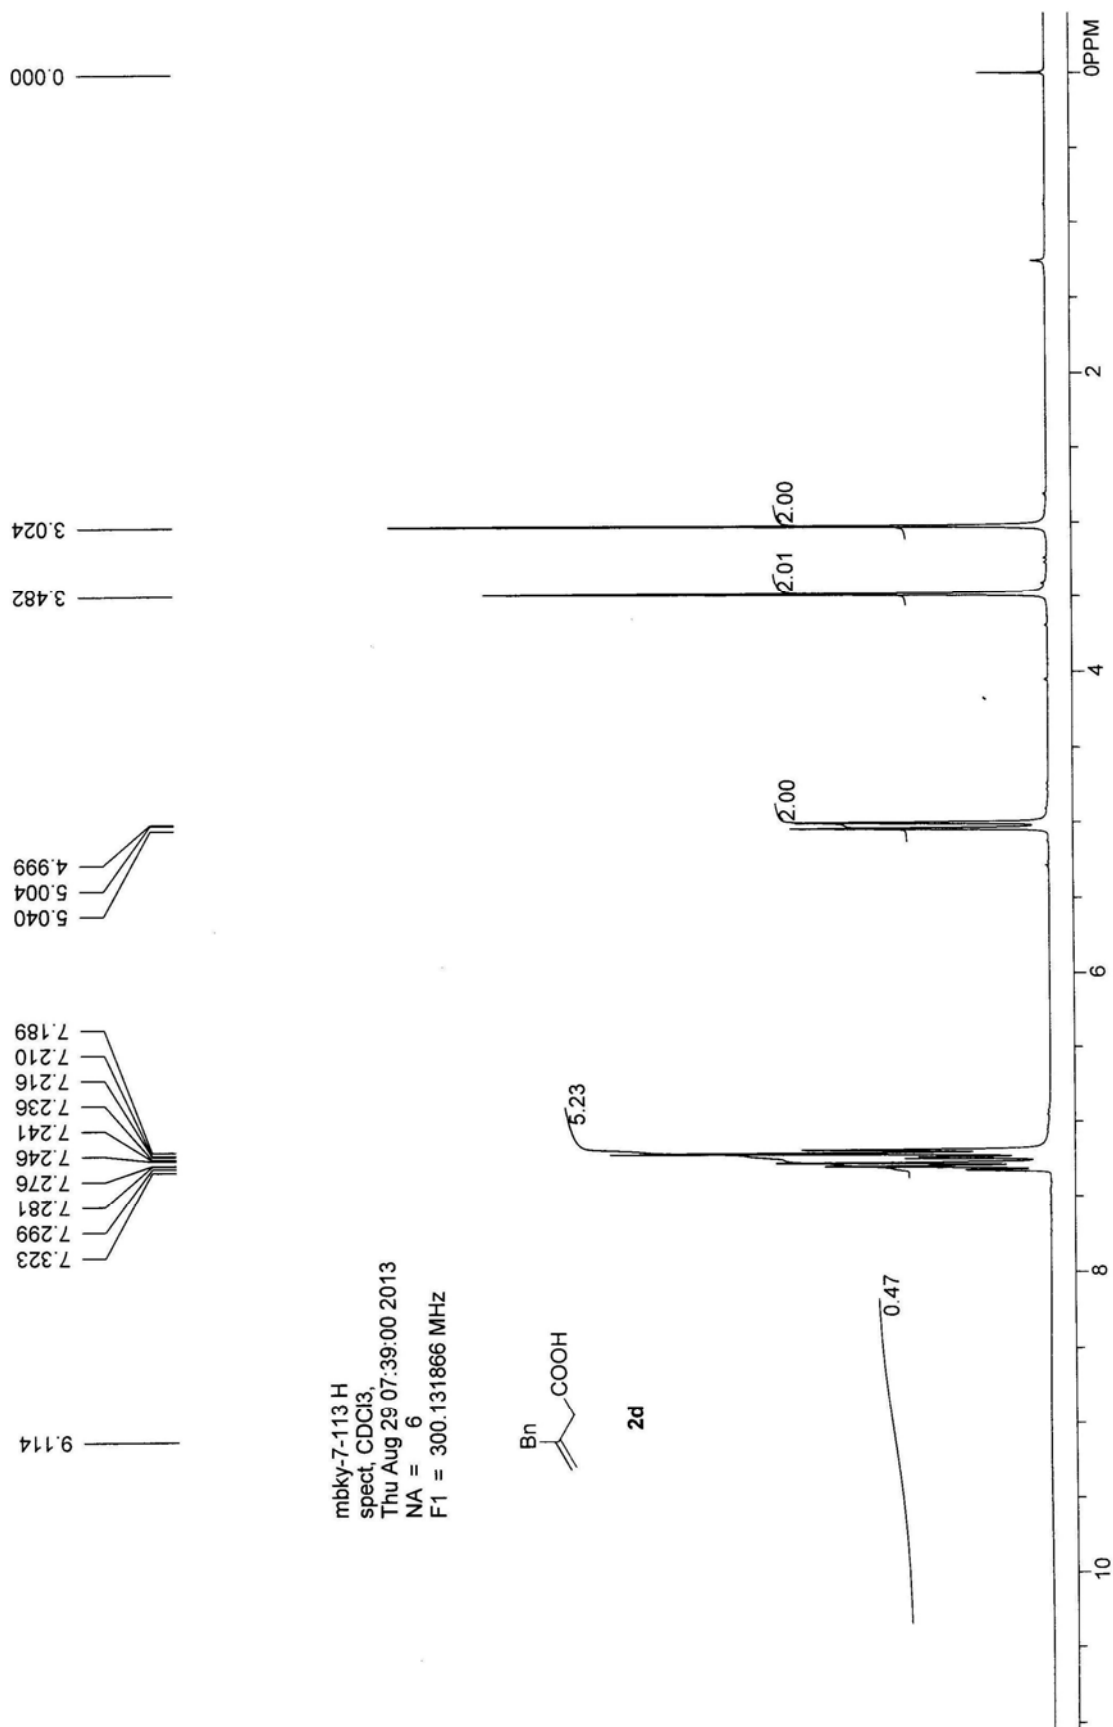

mbky-7-113 H  
spect, CDCl<sub>3</sub>,  
Thu Aug 29 07:39:00 2013  
NA = 6  
F1 = 300.131866 MHz

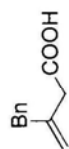

2d

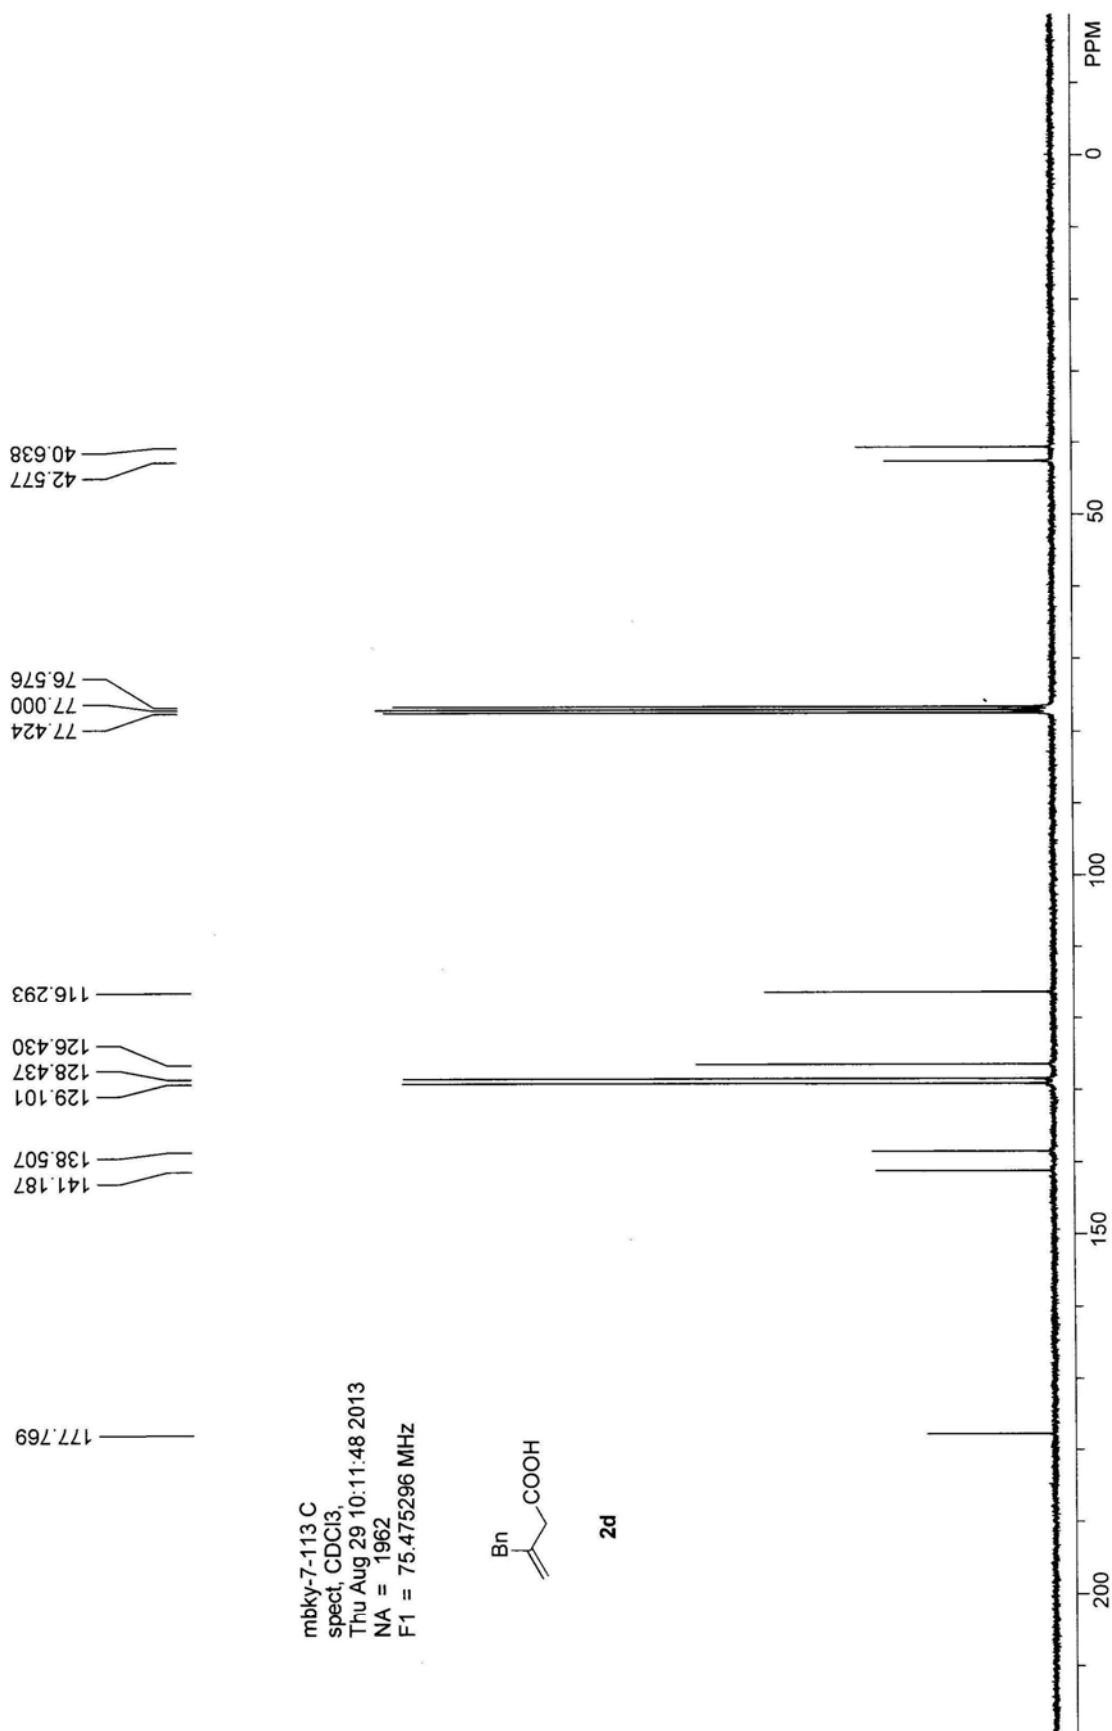

mbky-7-113 C  
 spect, CDCl<sub>3</sub>,  
 Thu Aug 29 10:11:48 2013  
 NA = 1962  
 F1 = 75.475296 MHz

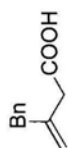

**2d**

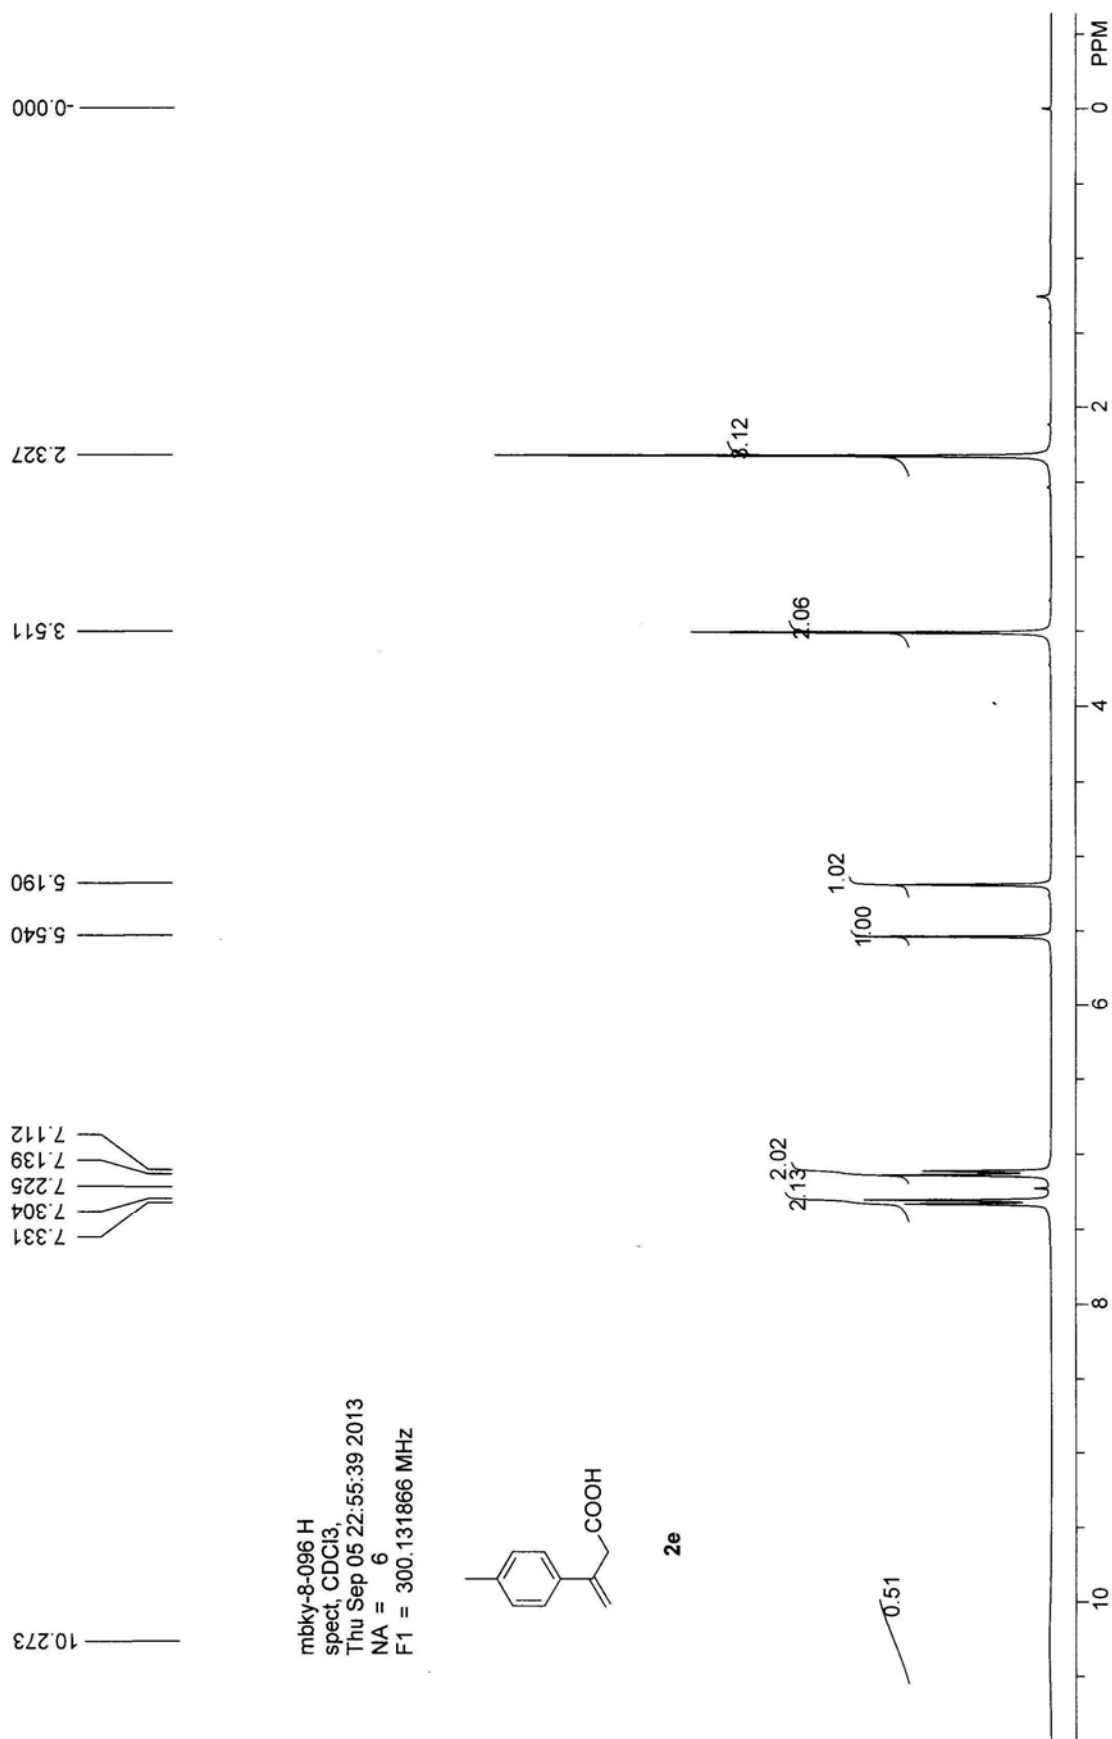



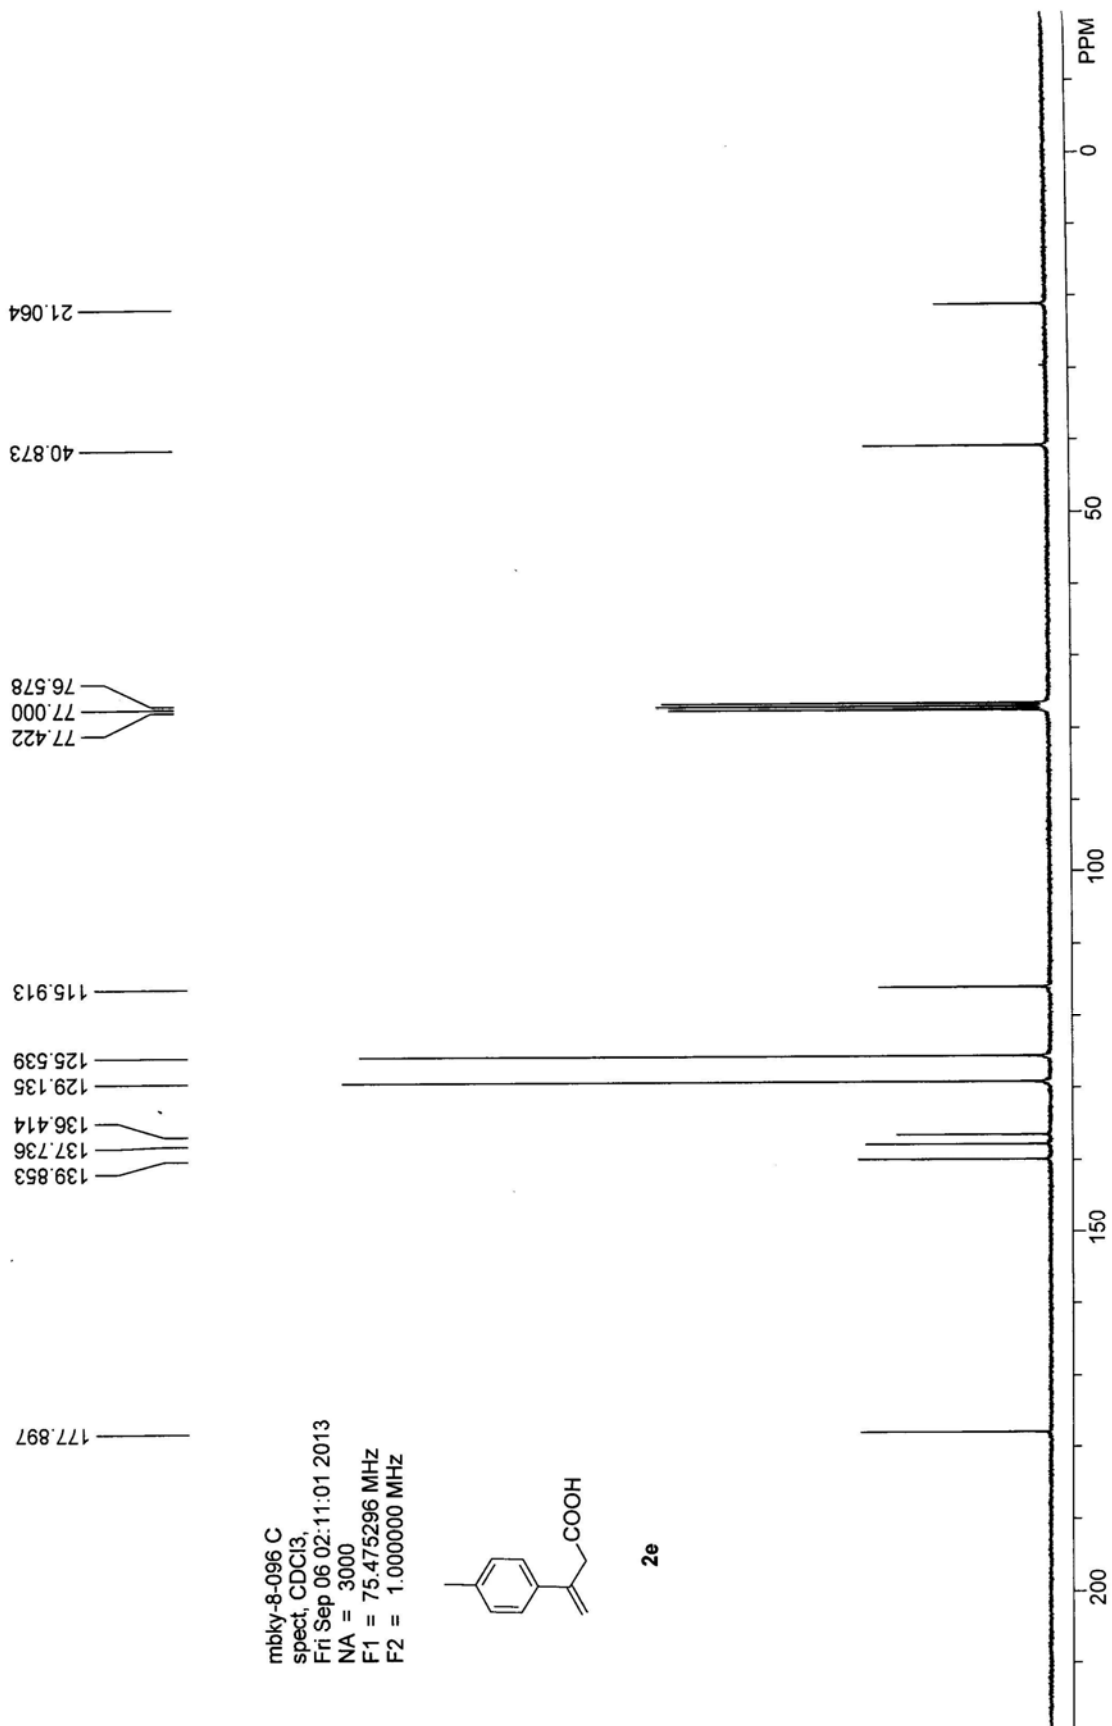

mbky-8-096 C  
 spect, CDCl3,  
 Fri Sep 06 02:11:01 2013  
 NA = 3000  
 F1 = 75.475296 MHz  
 F2 = 1.000000 MHz

mbky-7-121 H  
spect, CDCl<sub>3</sub>,  
Tue Sep 03 20:29:37 2013  
NA = 6  
F1 = 300.131866 MHz

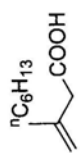

2f

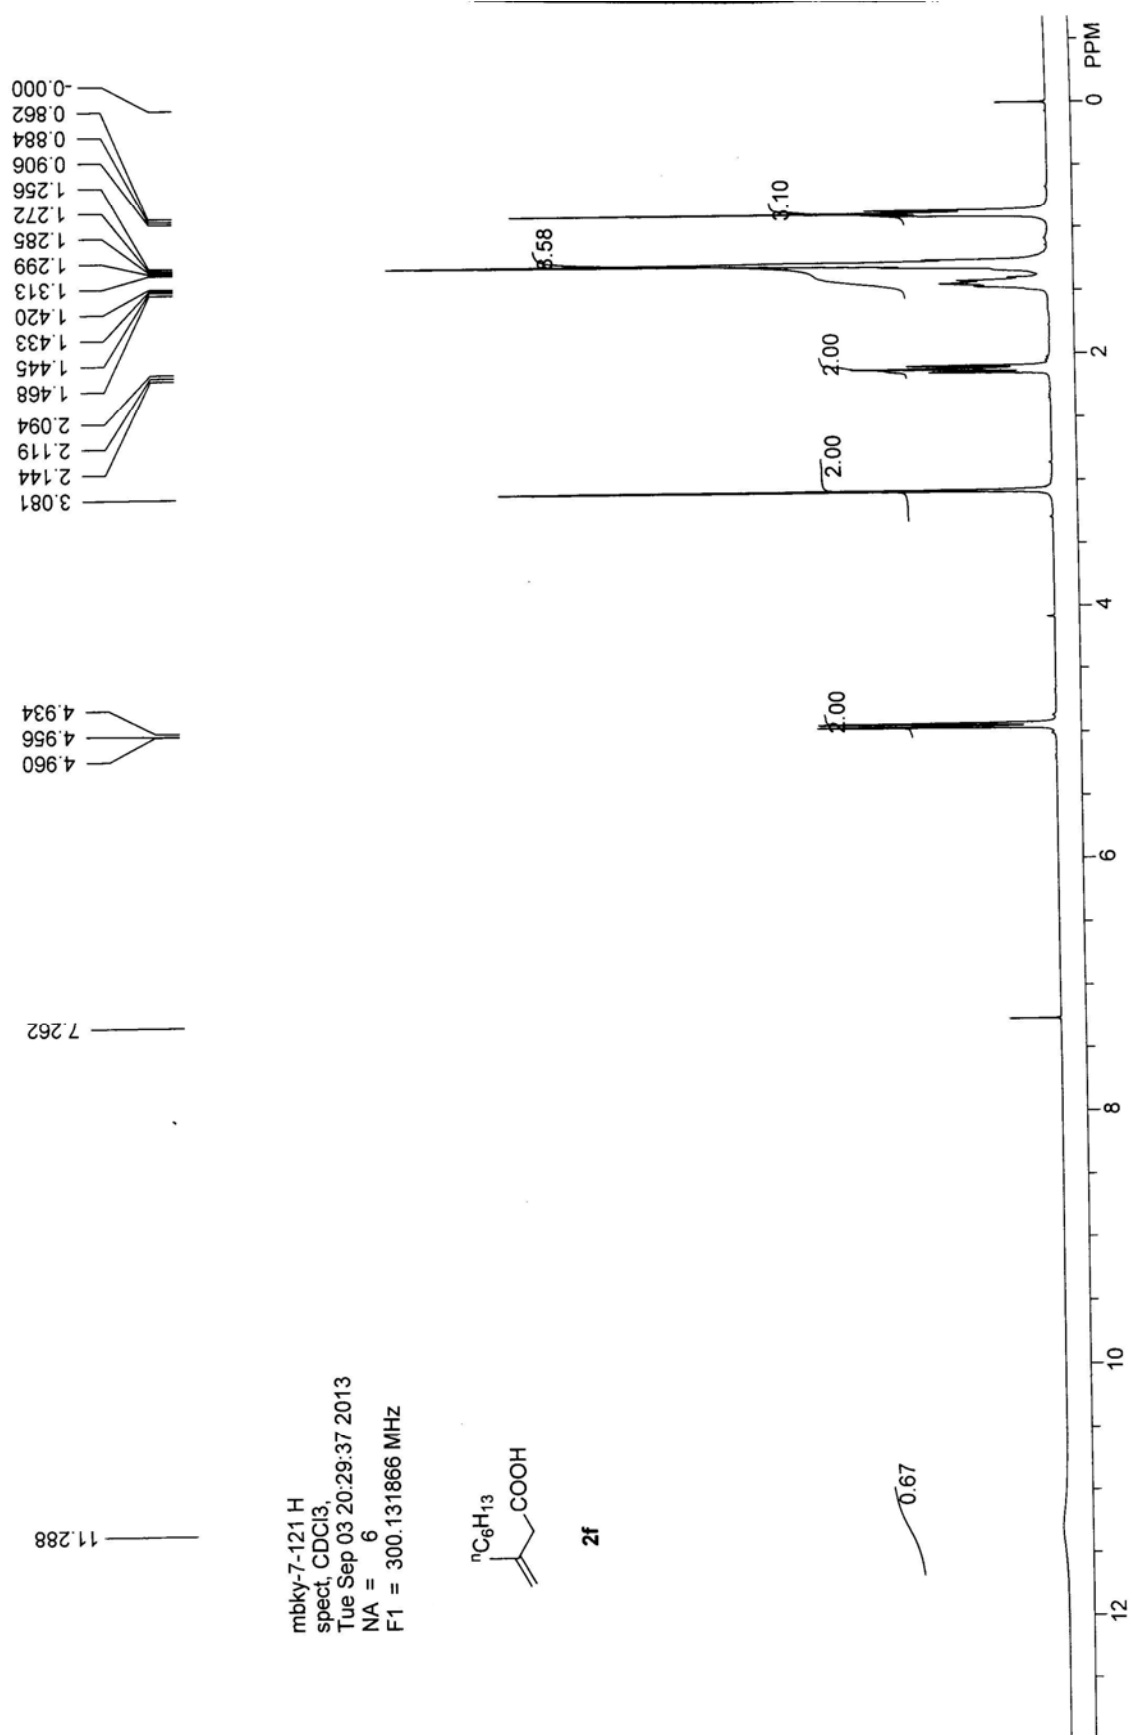

mbky-7-121 C  
 spect, CDCl<sub>3</sub>,  
 Sat Apr 27 00:19:11 2013  
 NA = 1500  
 F1 = 75.475296 MHz

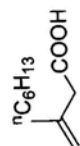

2f

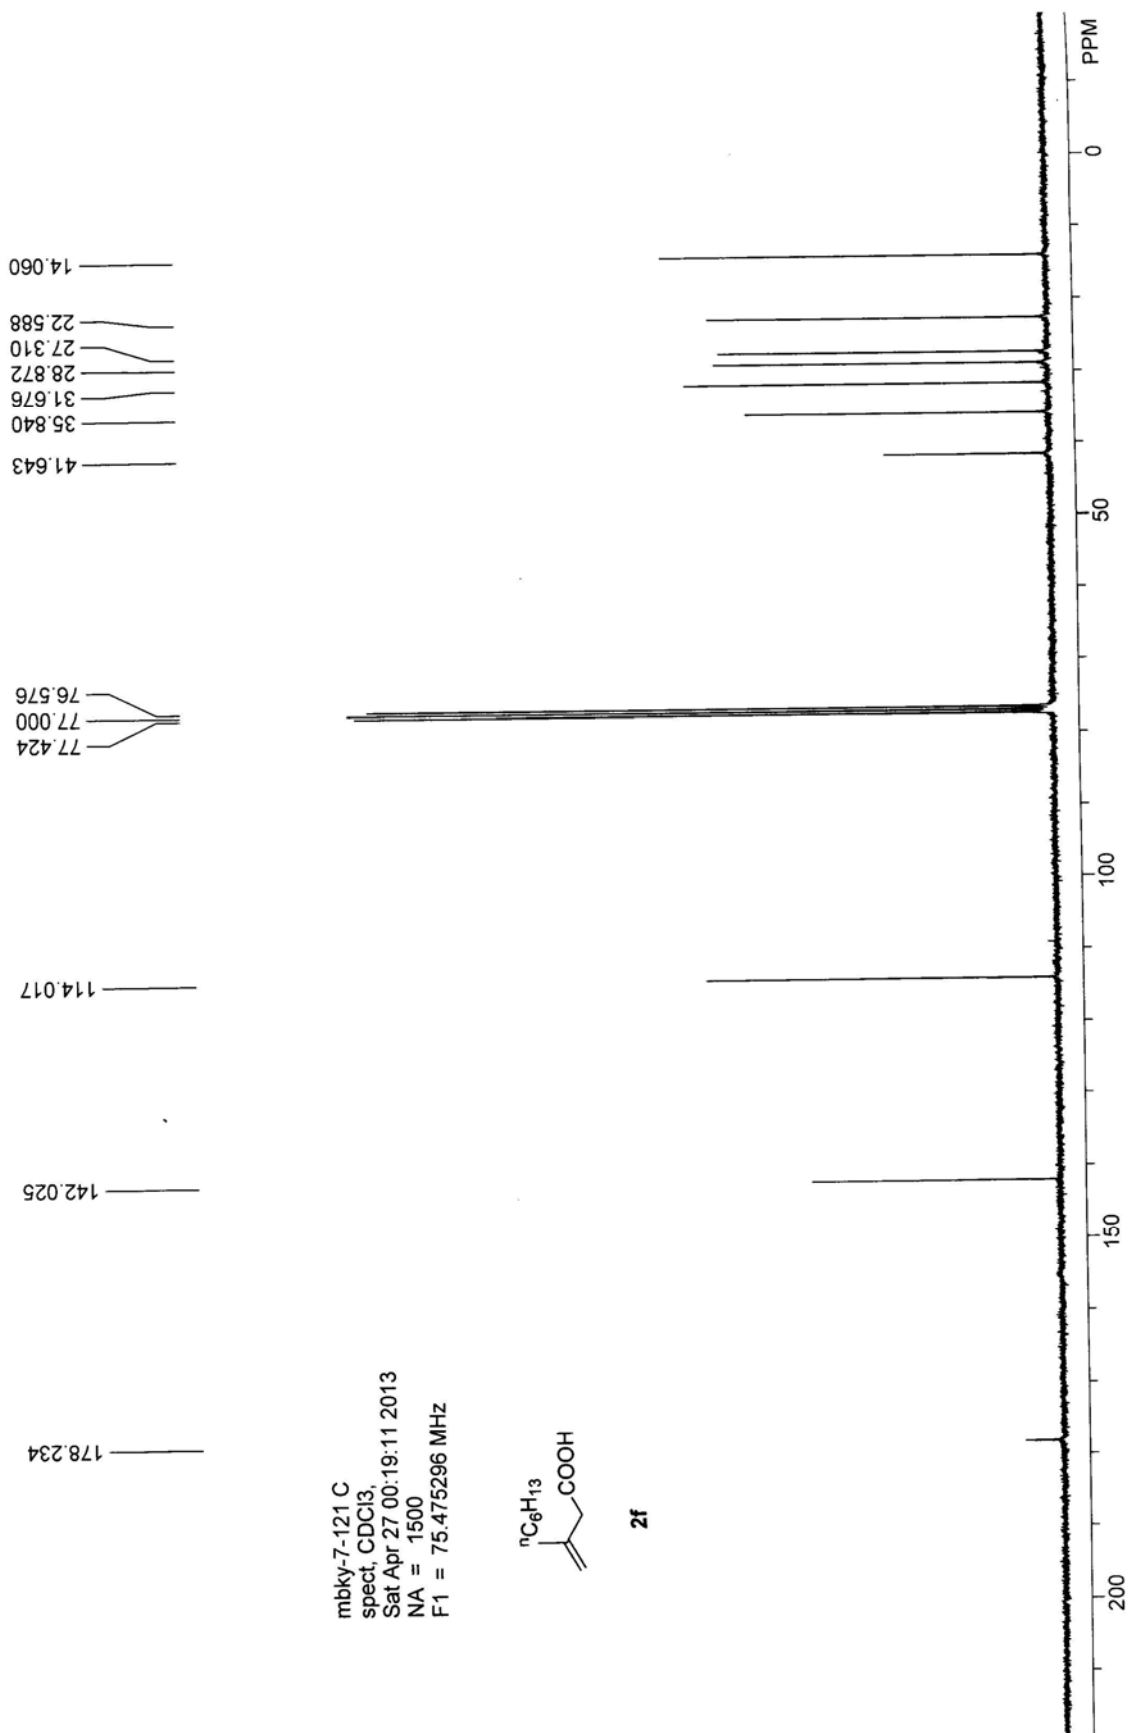

mbky-8-125 H  
spect, CDCl<sub>3</sub>,  
Fri Oct 04 21:45:00 2013  
NA = 6  
F1 = 300.131866 MHz

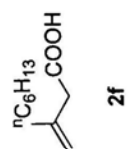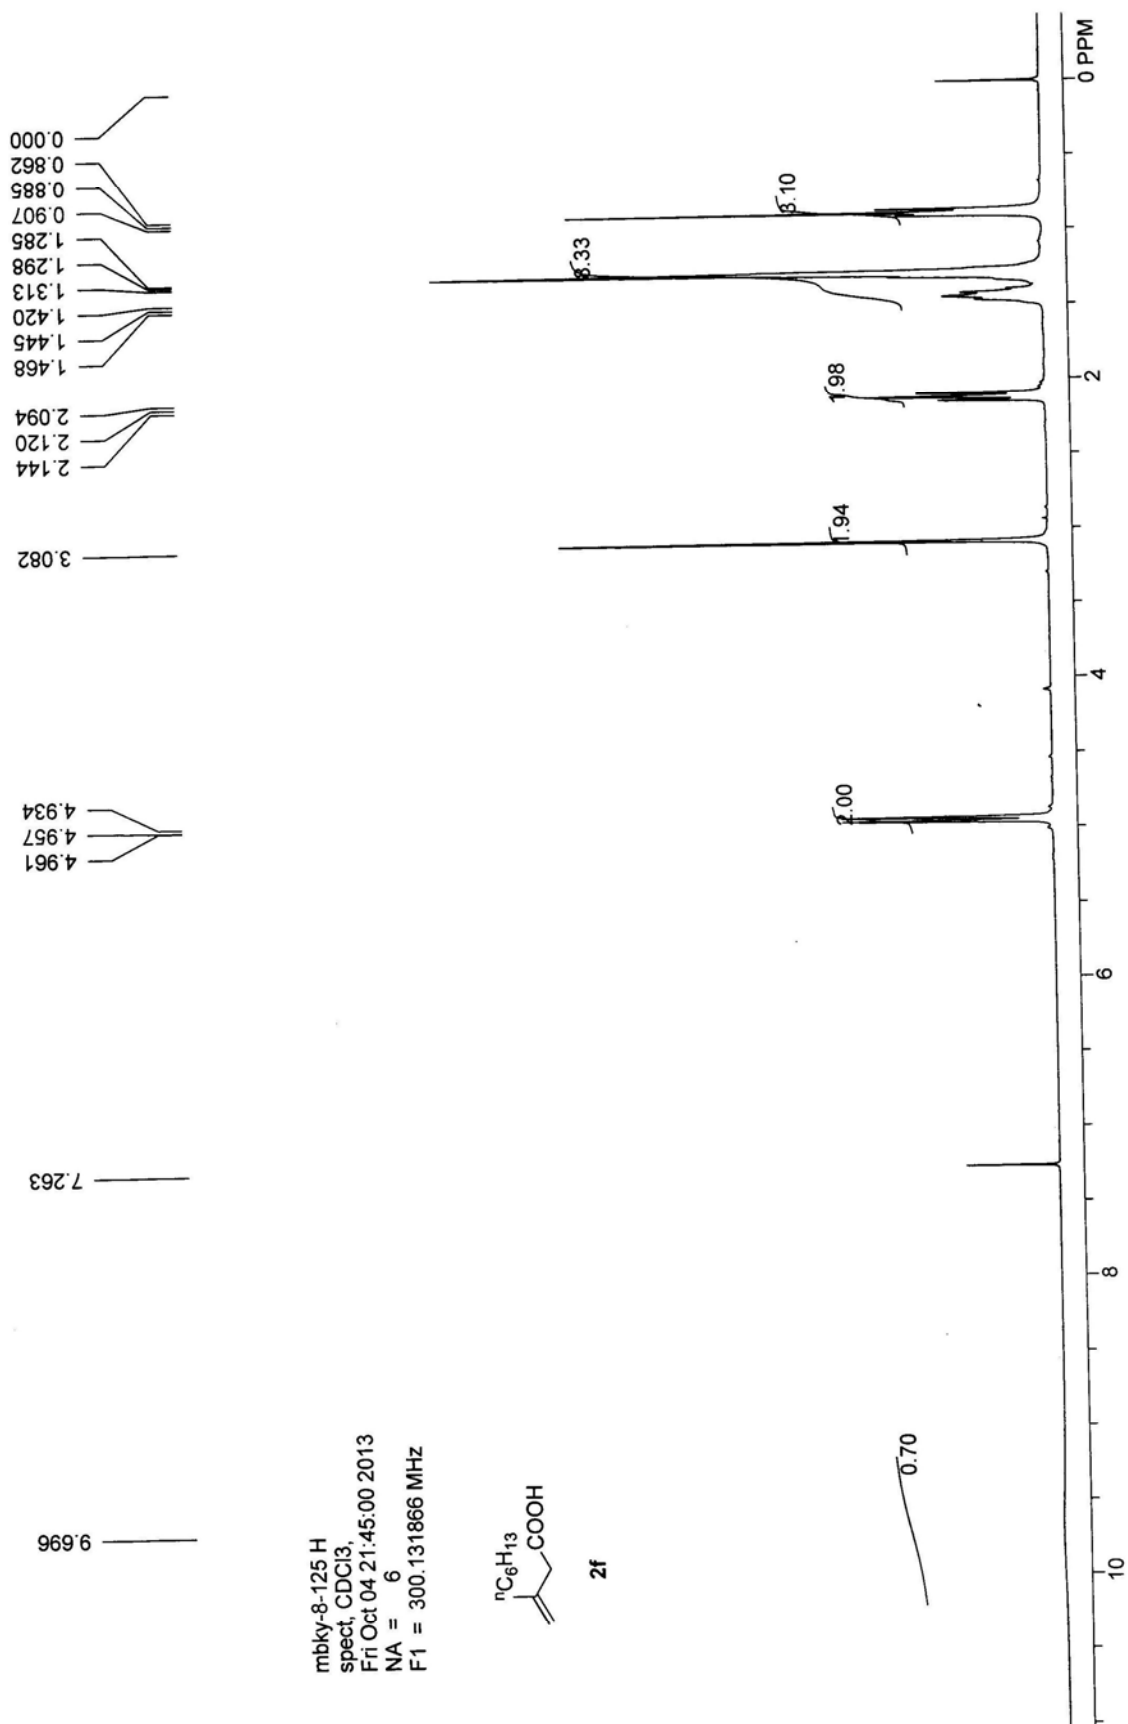

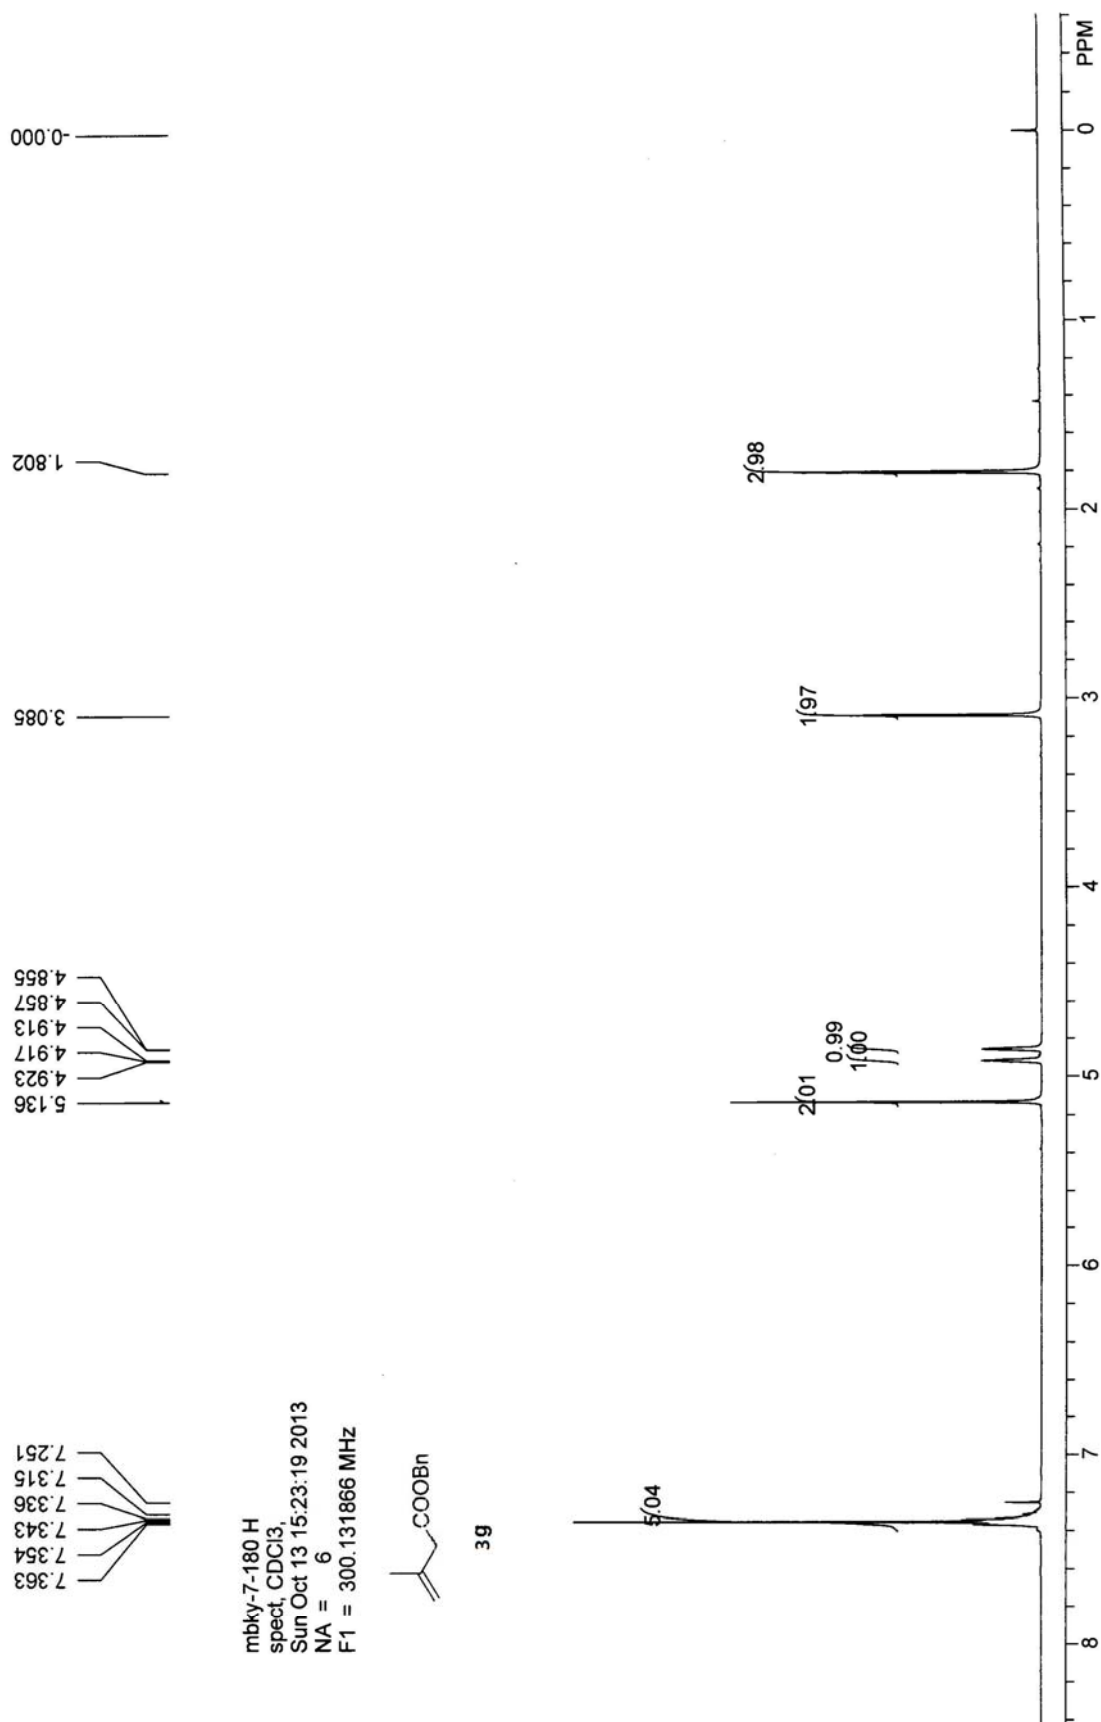

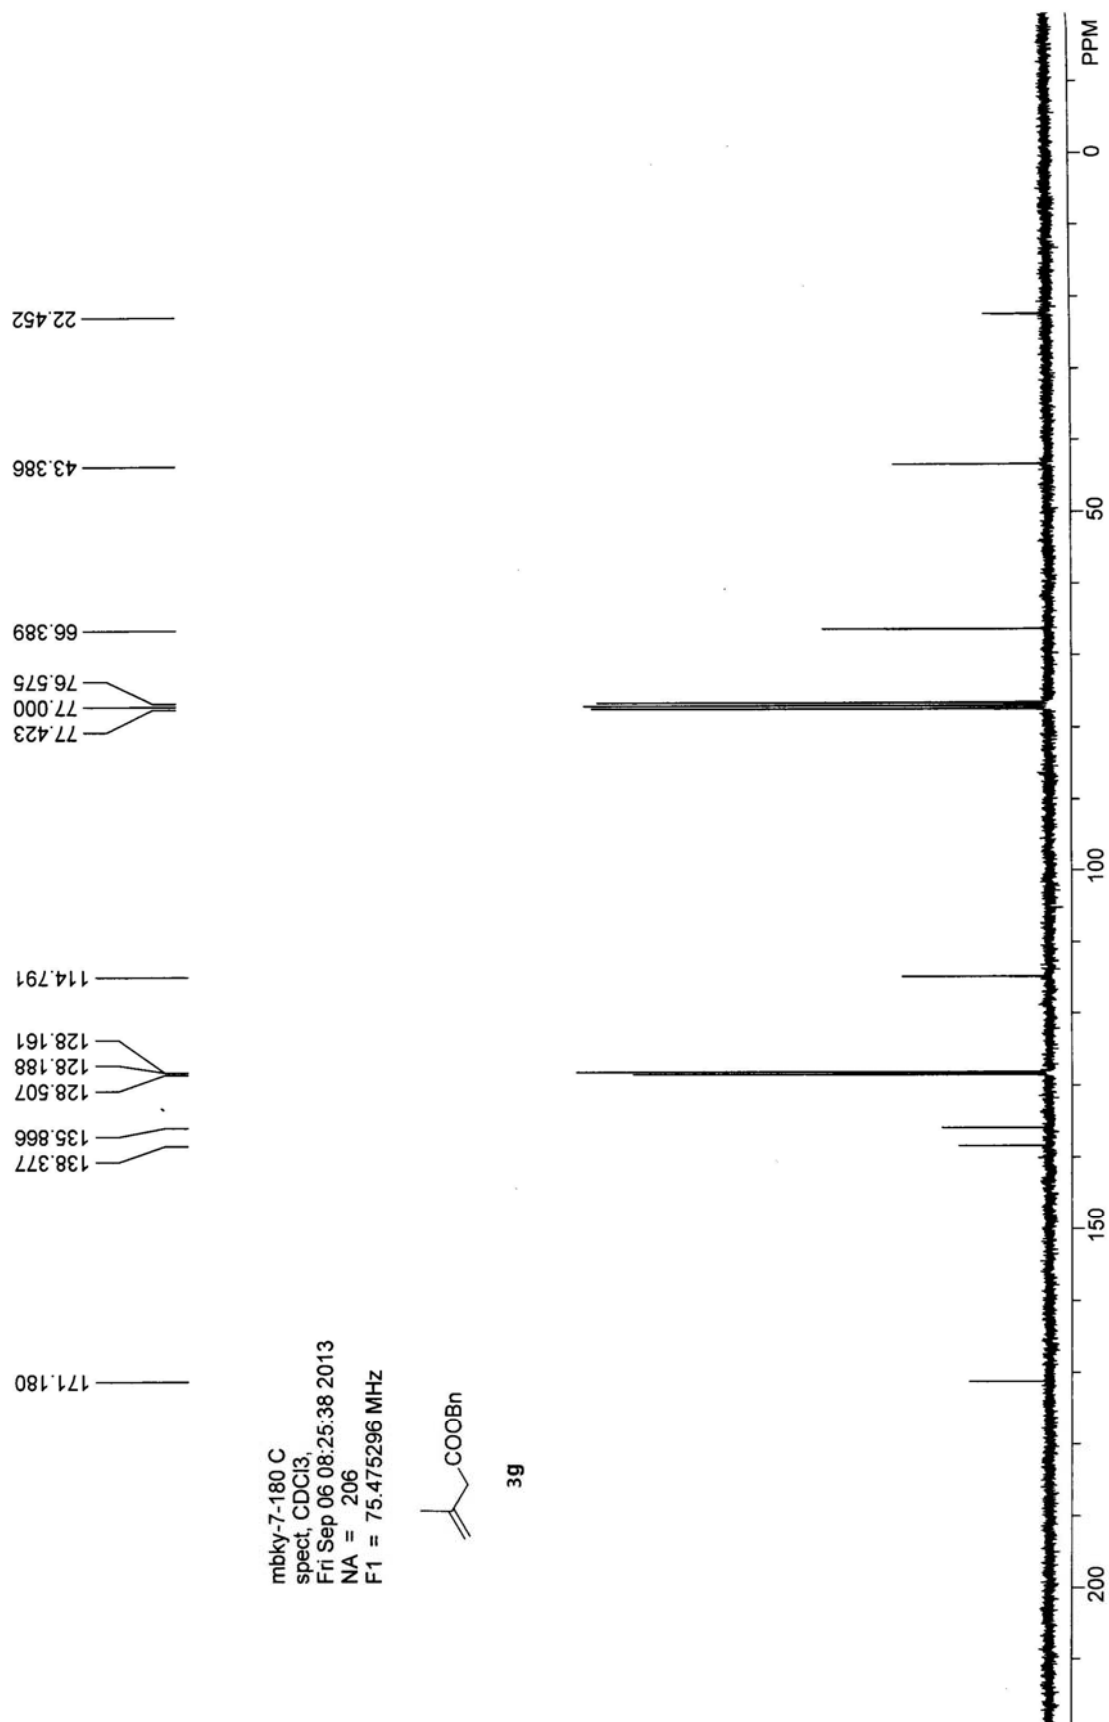

mbky-7-180 C  
spect, CDCl<sub>3</sub>,  
Fri Sep 06 08:25:38 2013  
NA = 206  
F1 = 75.475296 MHz

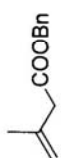

3g

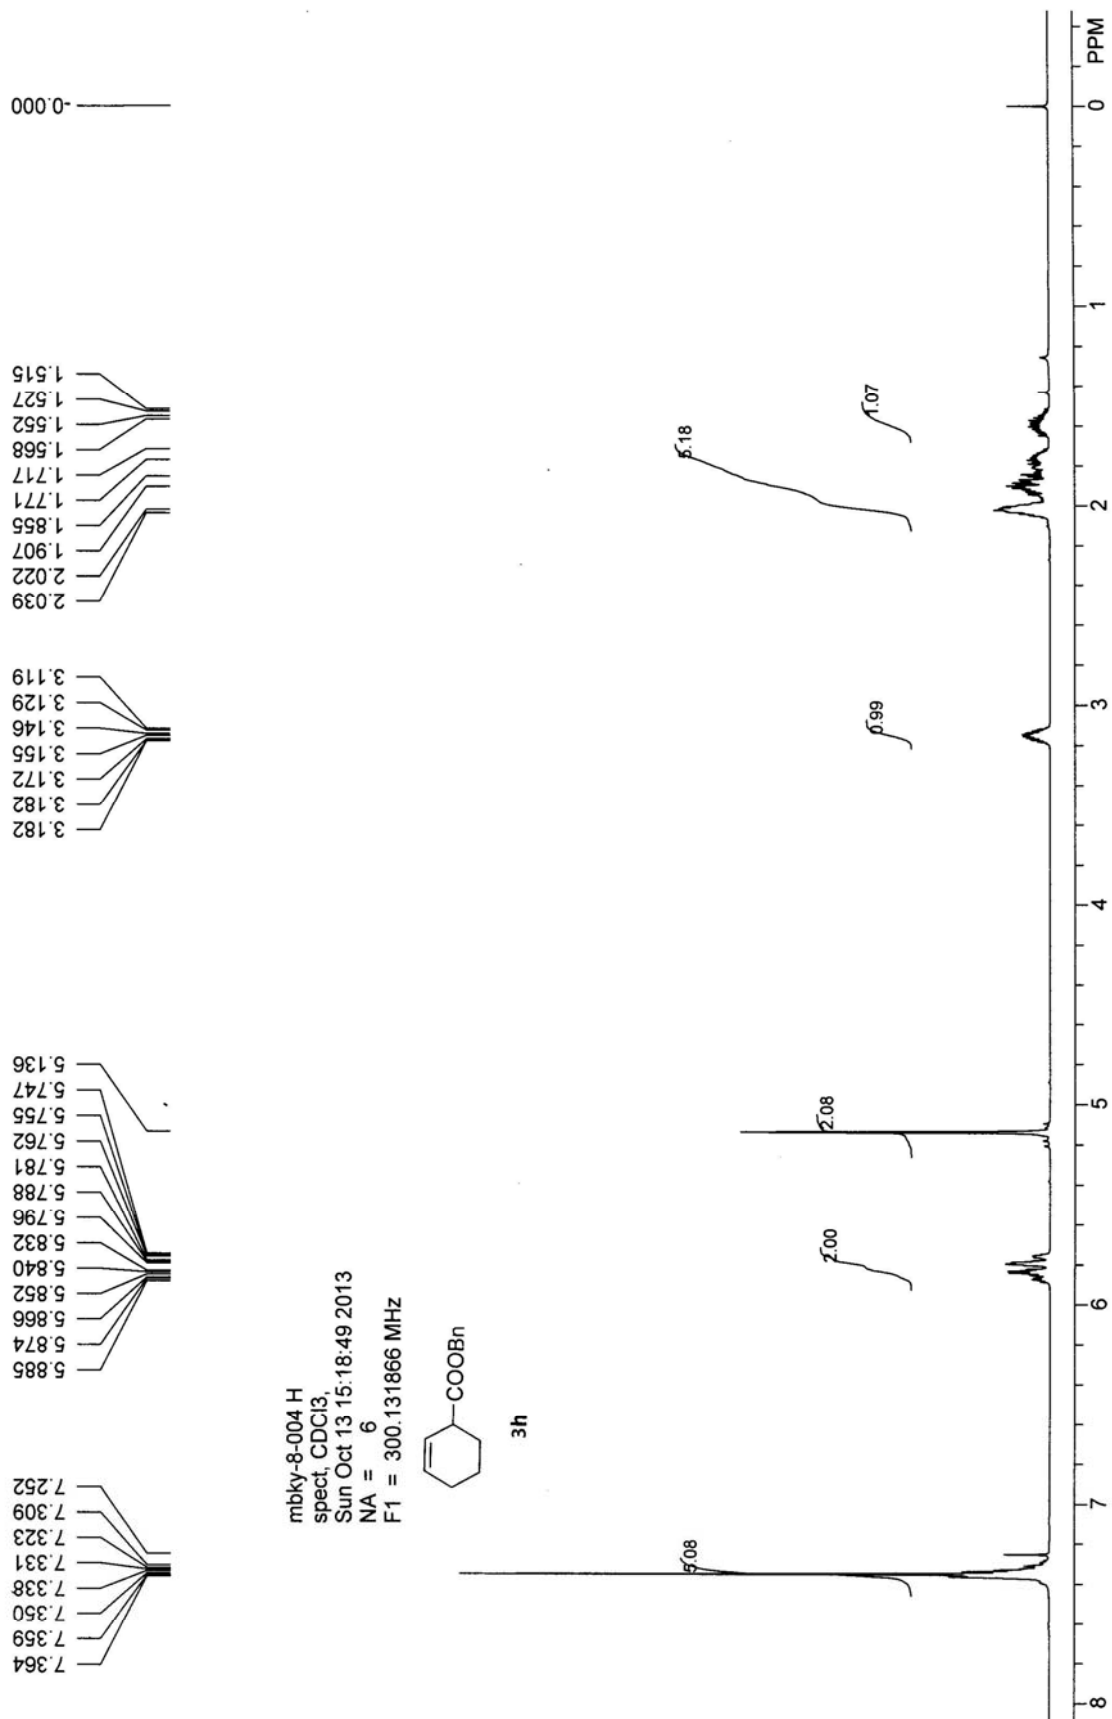

mbky-8-004 H  
 spect, CDCl3,  
 Sun Oct 13 15:18:49 2013  
 NA = 6  
 F1 = 300.131866 MHz

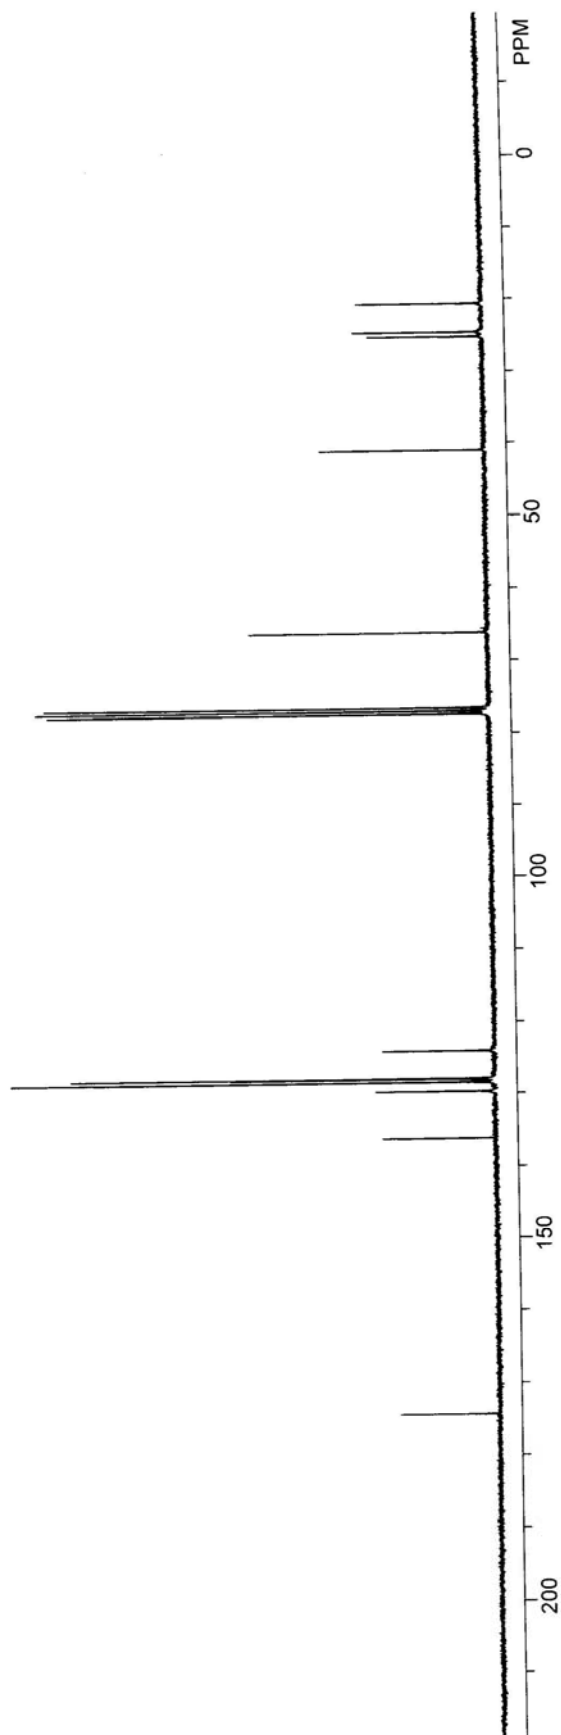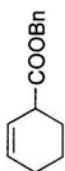

mbky-8-004 C  
 spect, CDCl3  
 Fri Sep 06 17:15:34 2013  
 NA = 1500

25.216  
 24.588  
 20.697

41.092

66.200

77.421  
 77.000  
 76.578

136.112  
 129.741  
 128.481  
 128.065  
 127.952  
 124.117

174.305



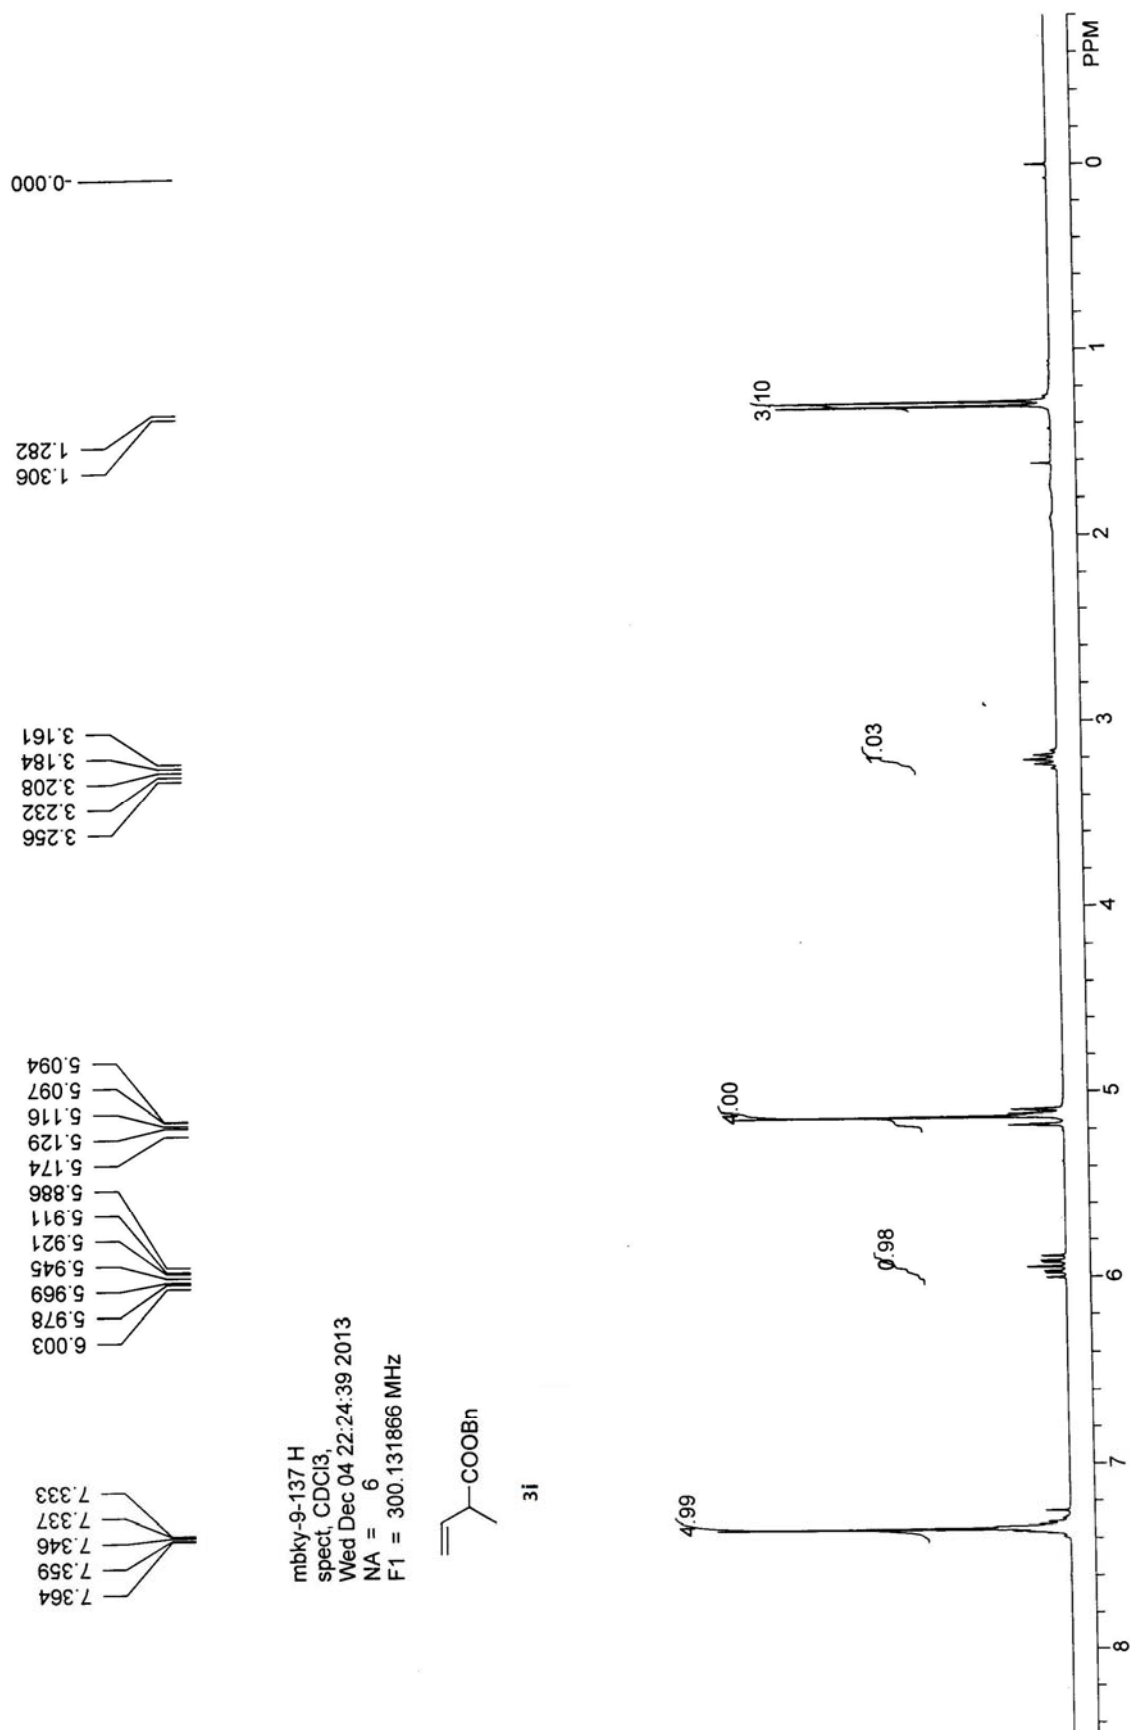

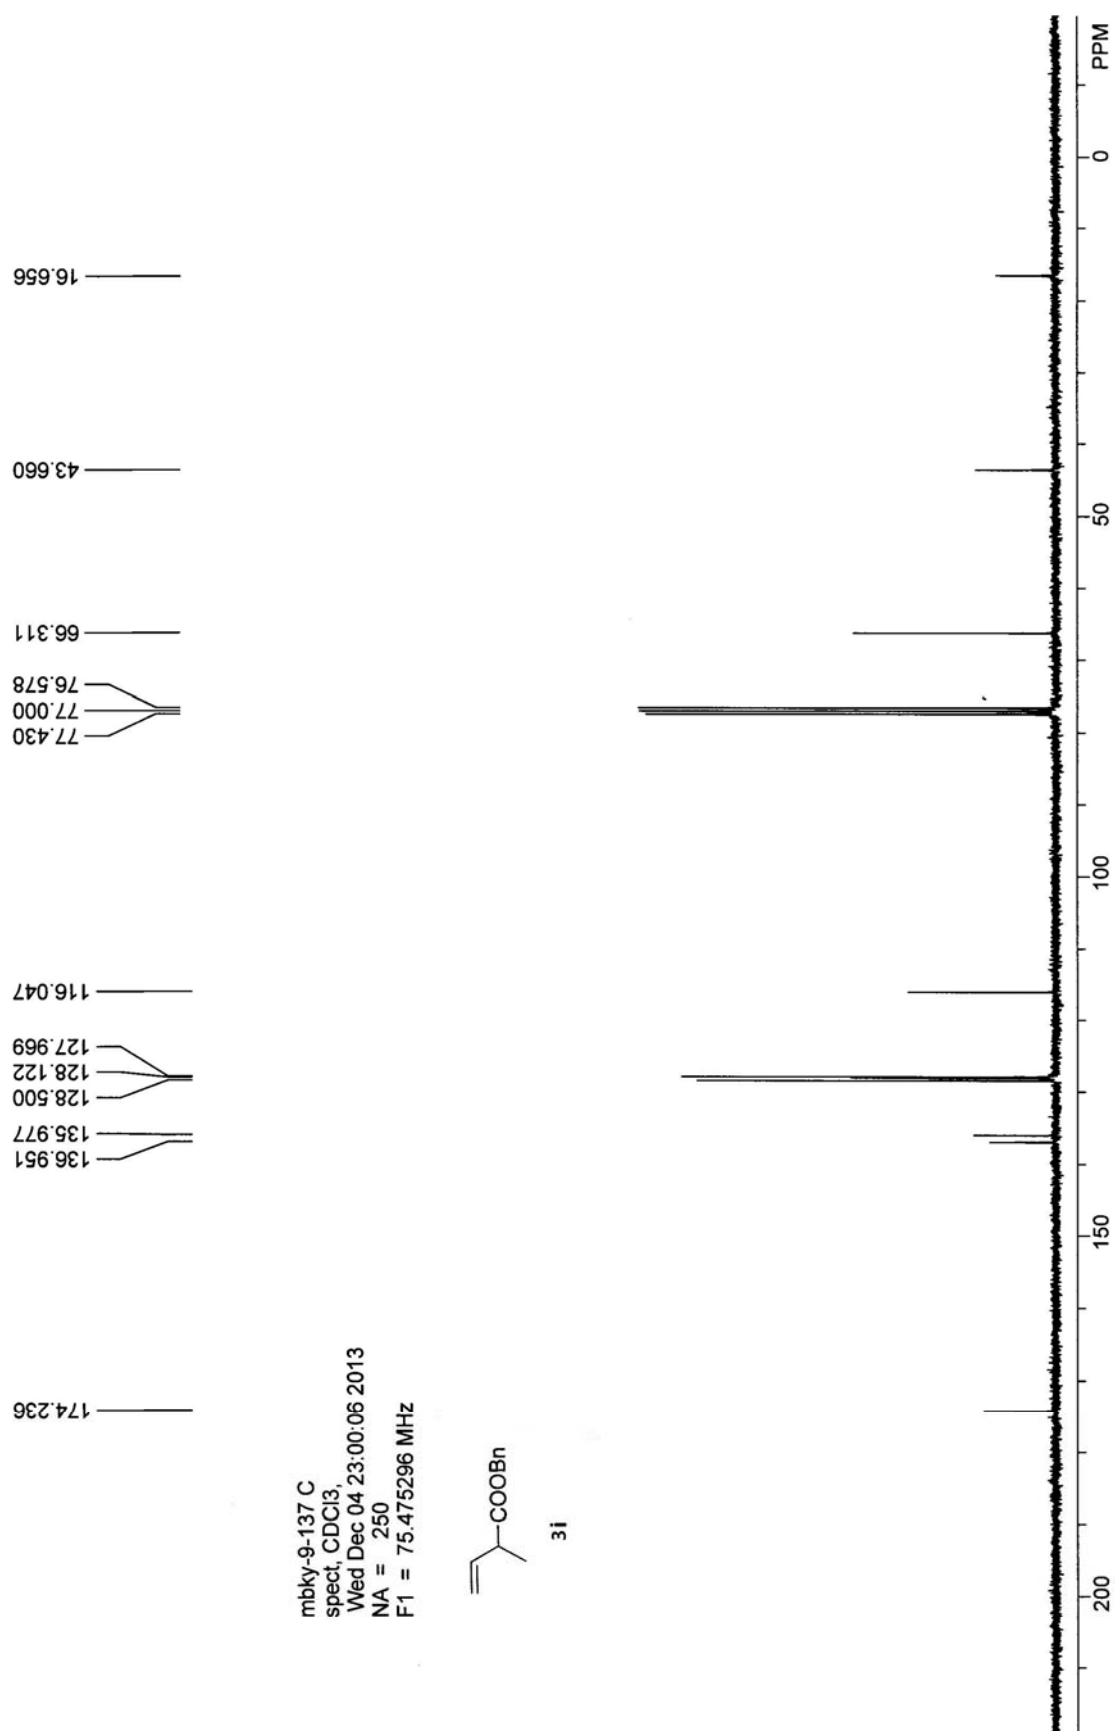

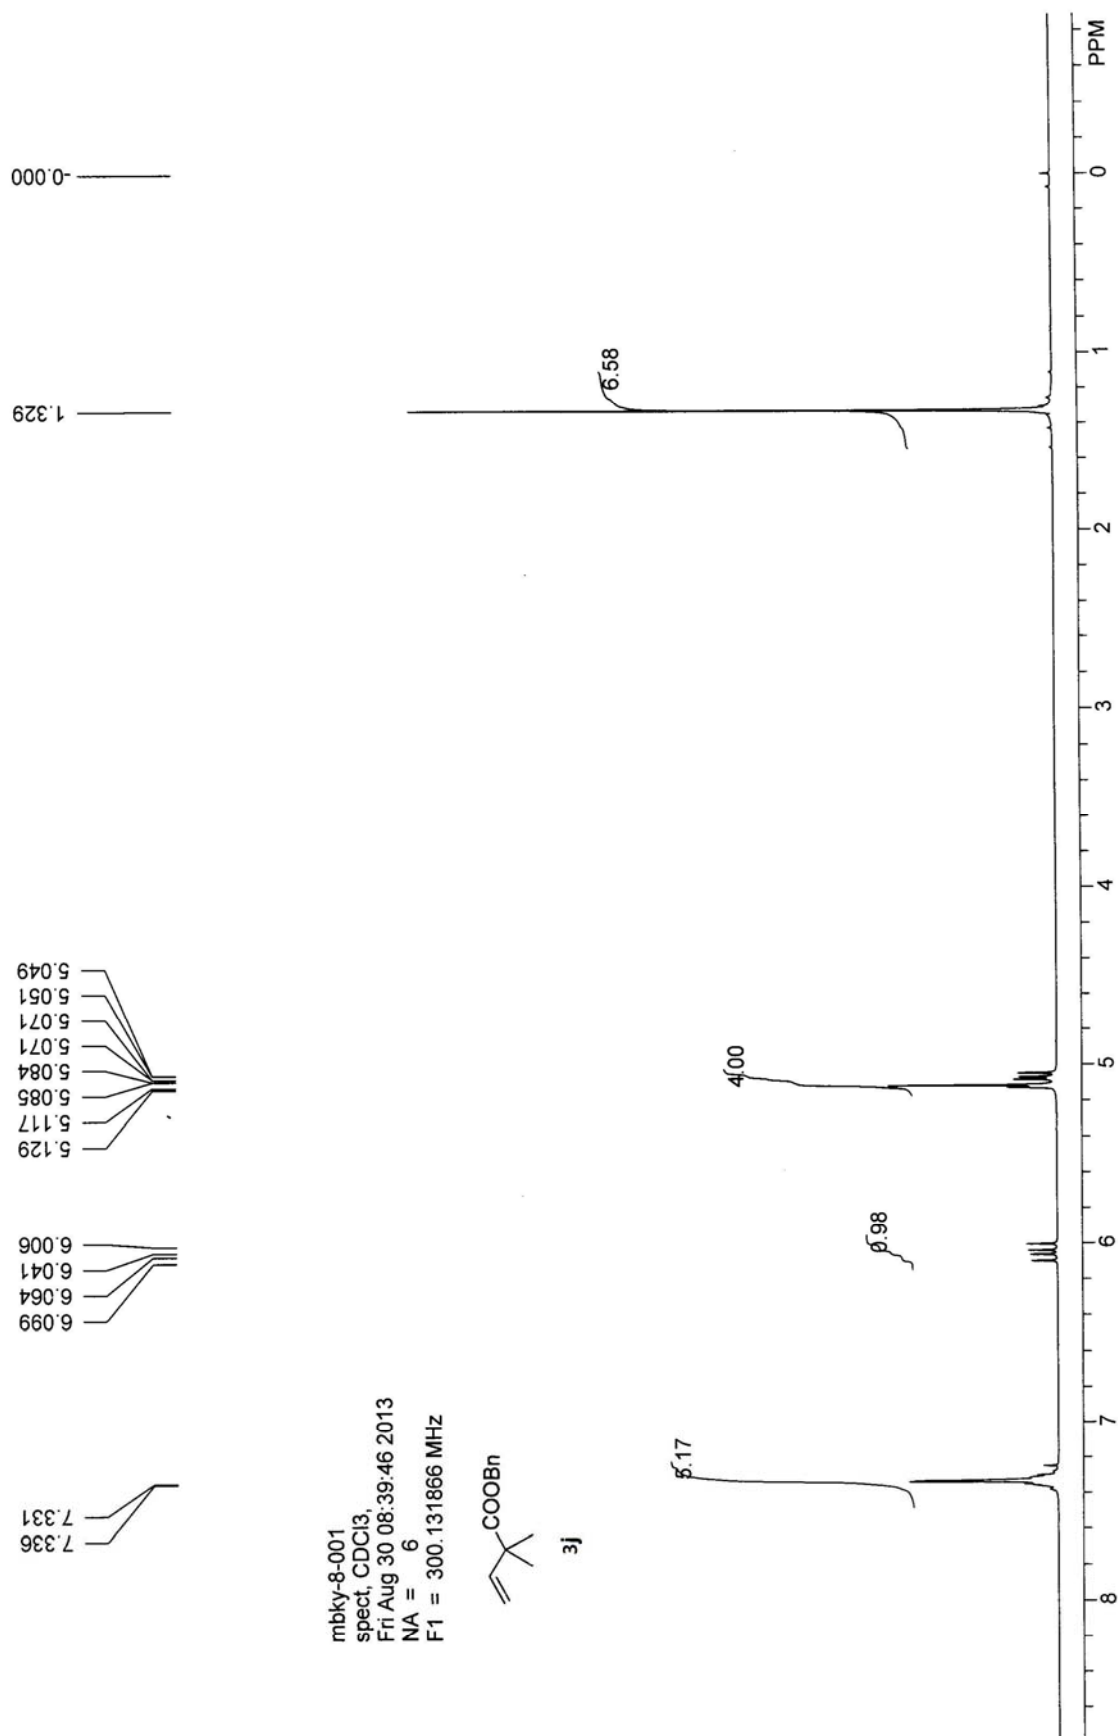

mbky-8-001 C  
 spect, CDCl<sub>3</sub>,  
 Thu Aug 29 20:10:50 2013  
 NA = 1500  
 F1 = 75.475296 MHz

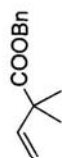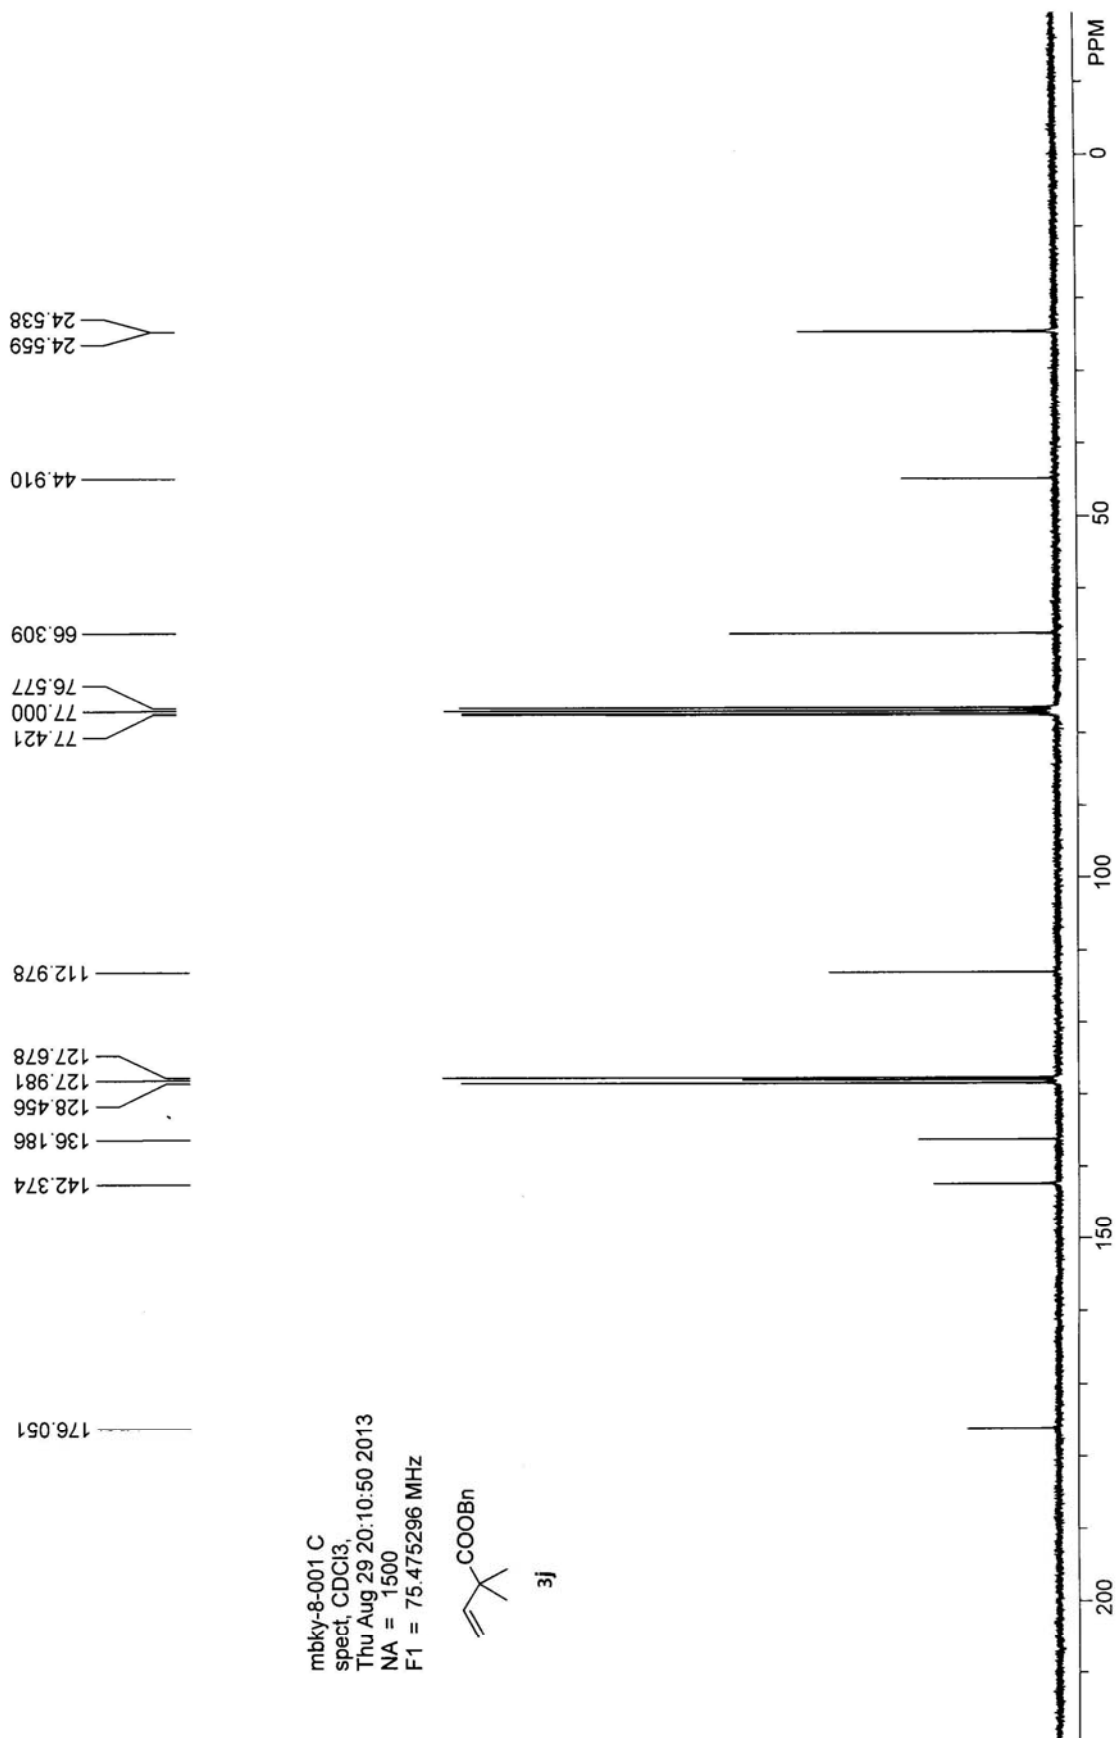

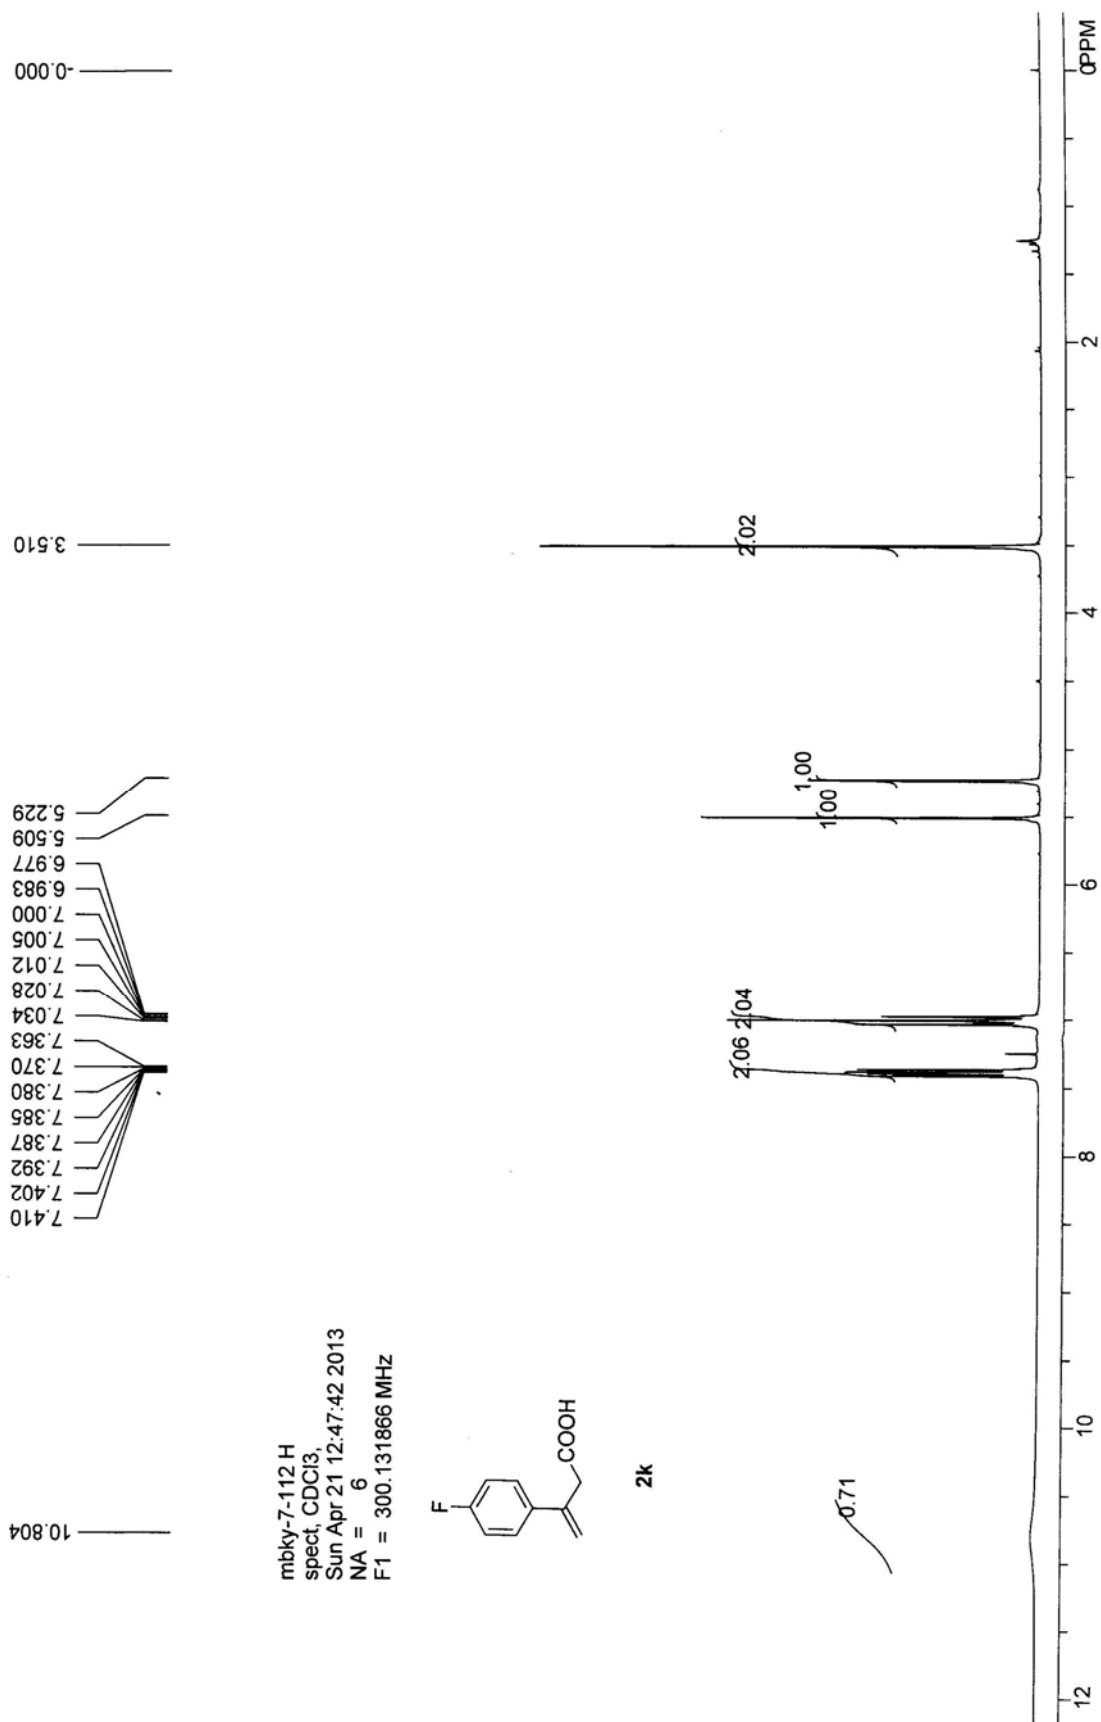

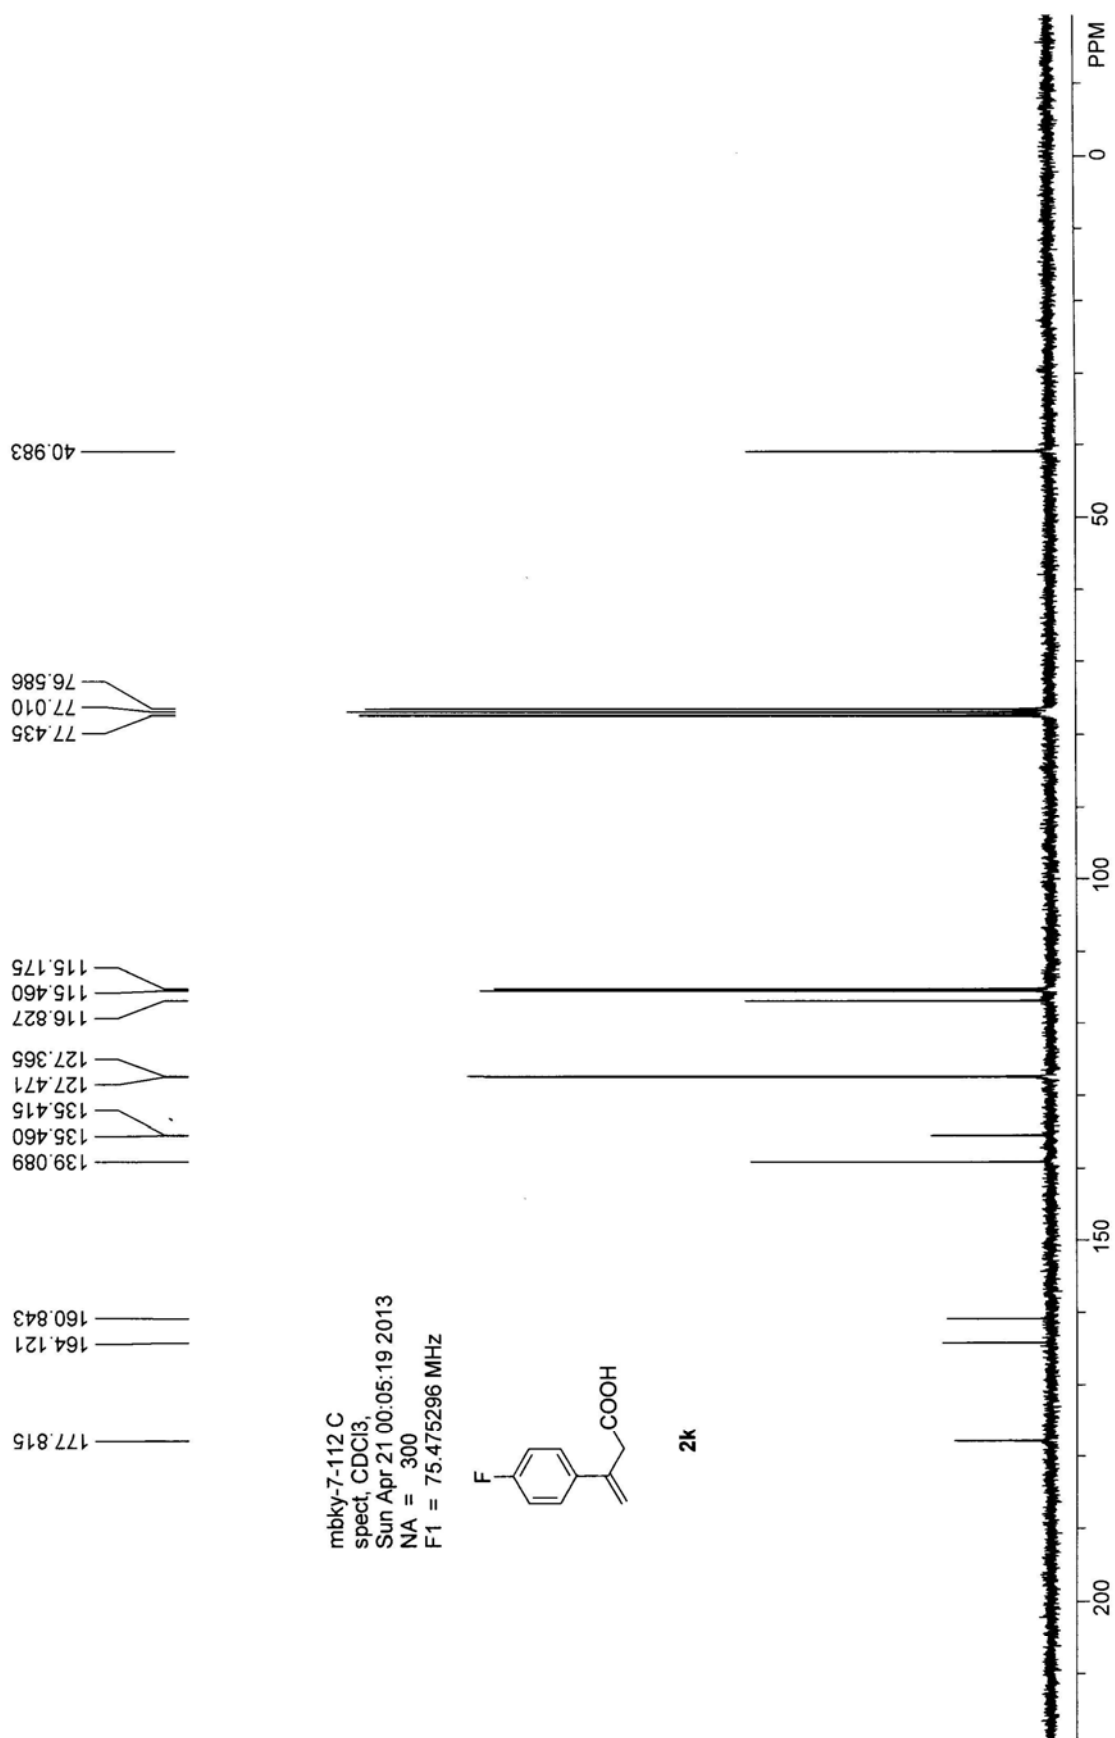

mbky-7-112 C  
 spect, CDCl<sub>3</sub>,  
 Sun Apr 21 00:05:19 2013  
 NA = 300  
 F1 = 75.475296 MHz

-0.000

-114.831

mbky-7-112 F  
spect, CDCl<sub>3</sub>,  
Thu Aug 29 19:39:40 2013  
NA = 16  
F1 = 282.376129 MHz

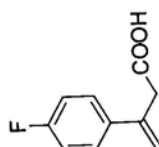

2k

PPM

-200

-150

-100

-50

0

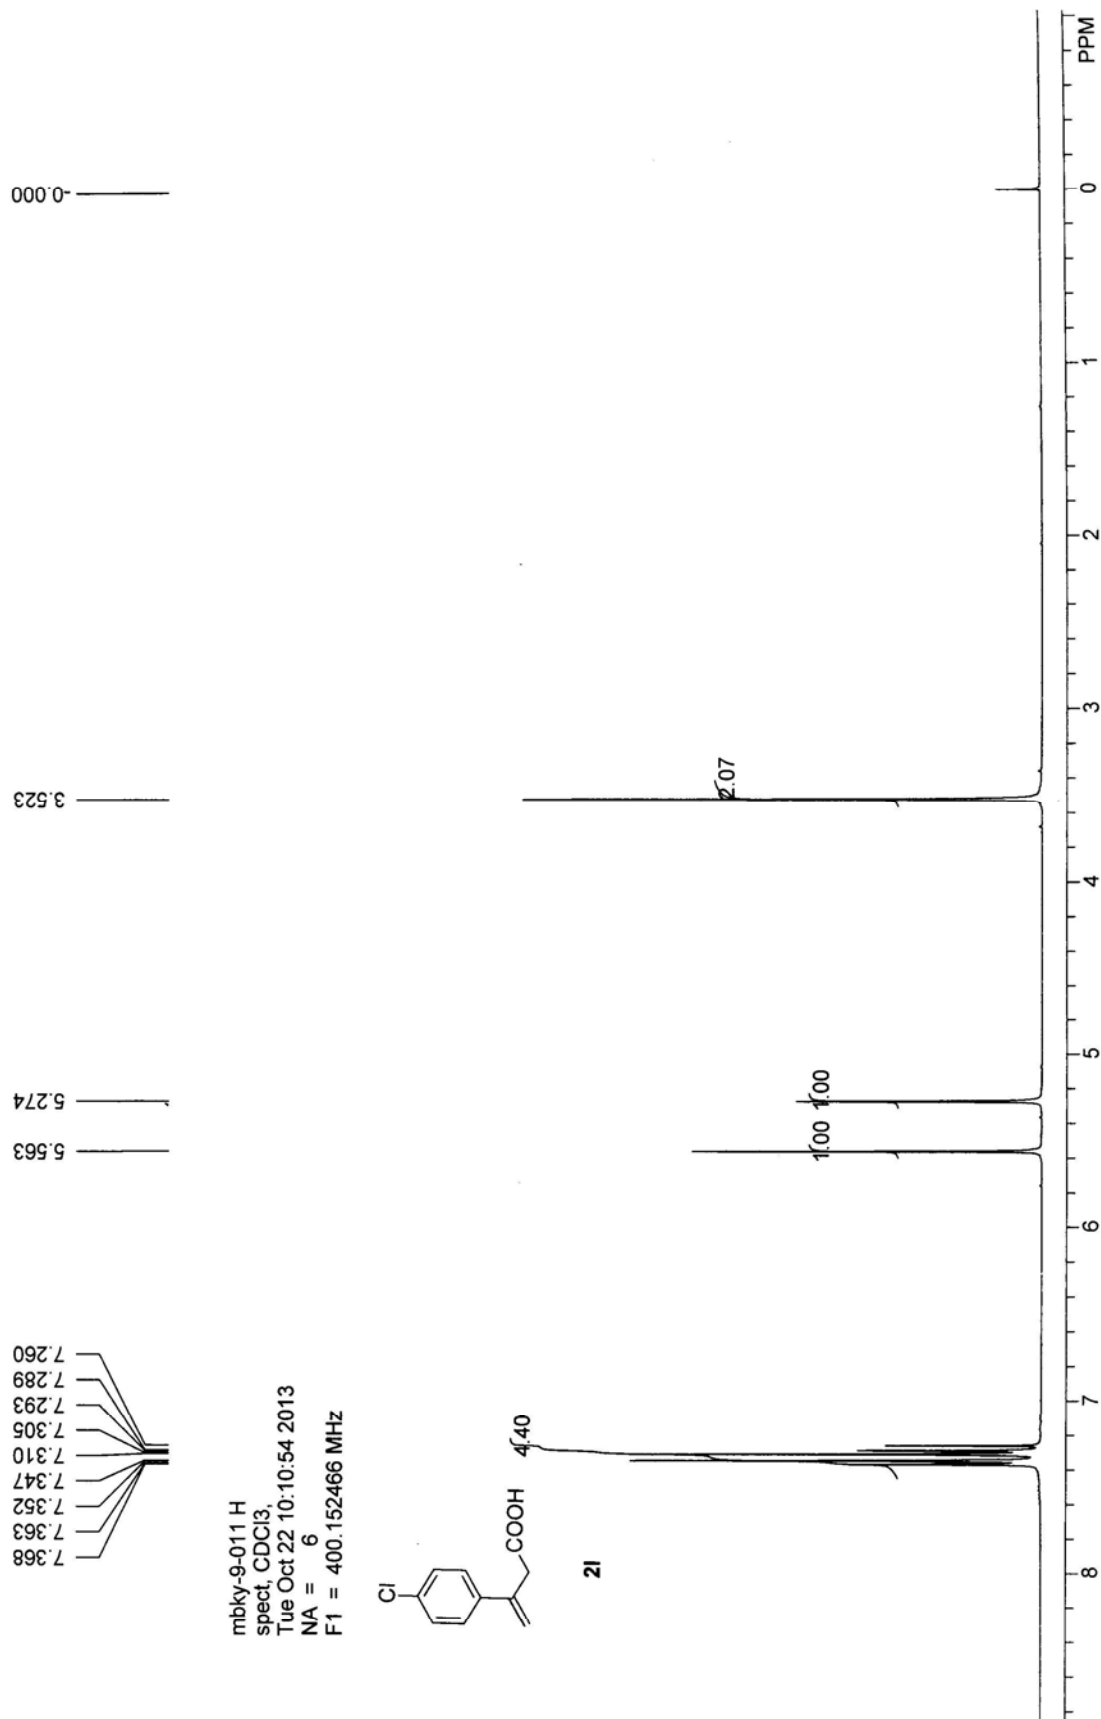



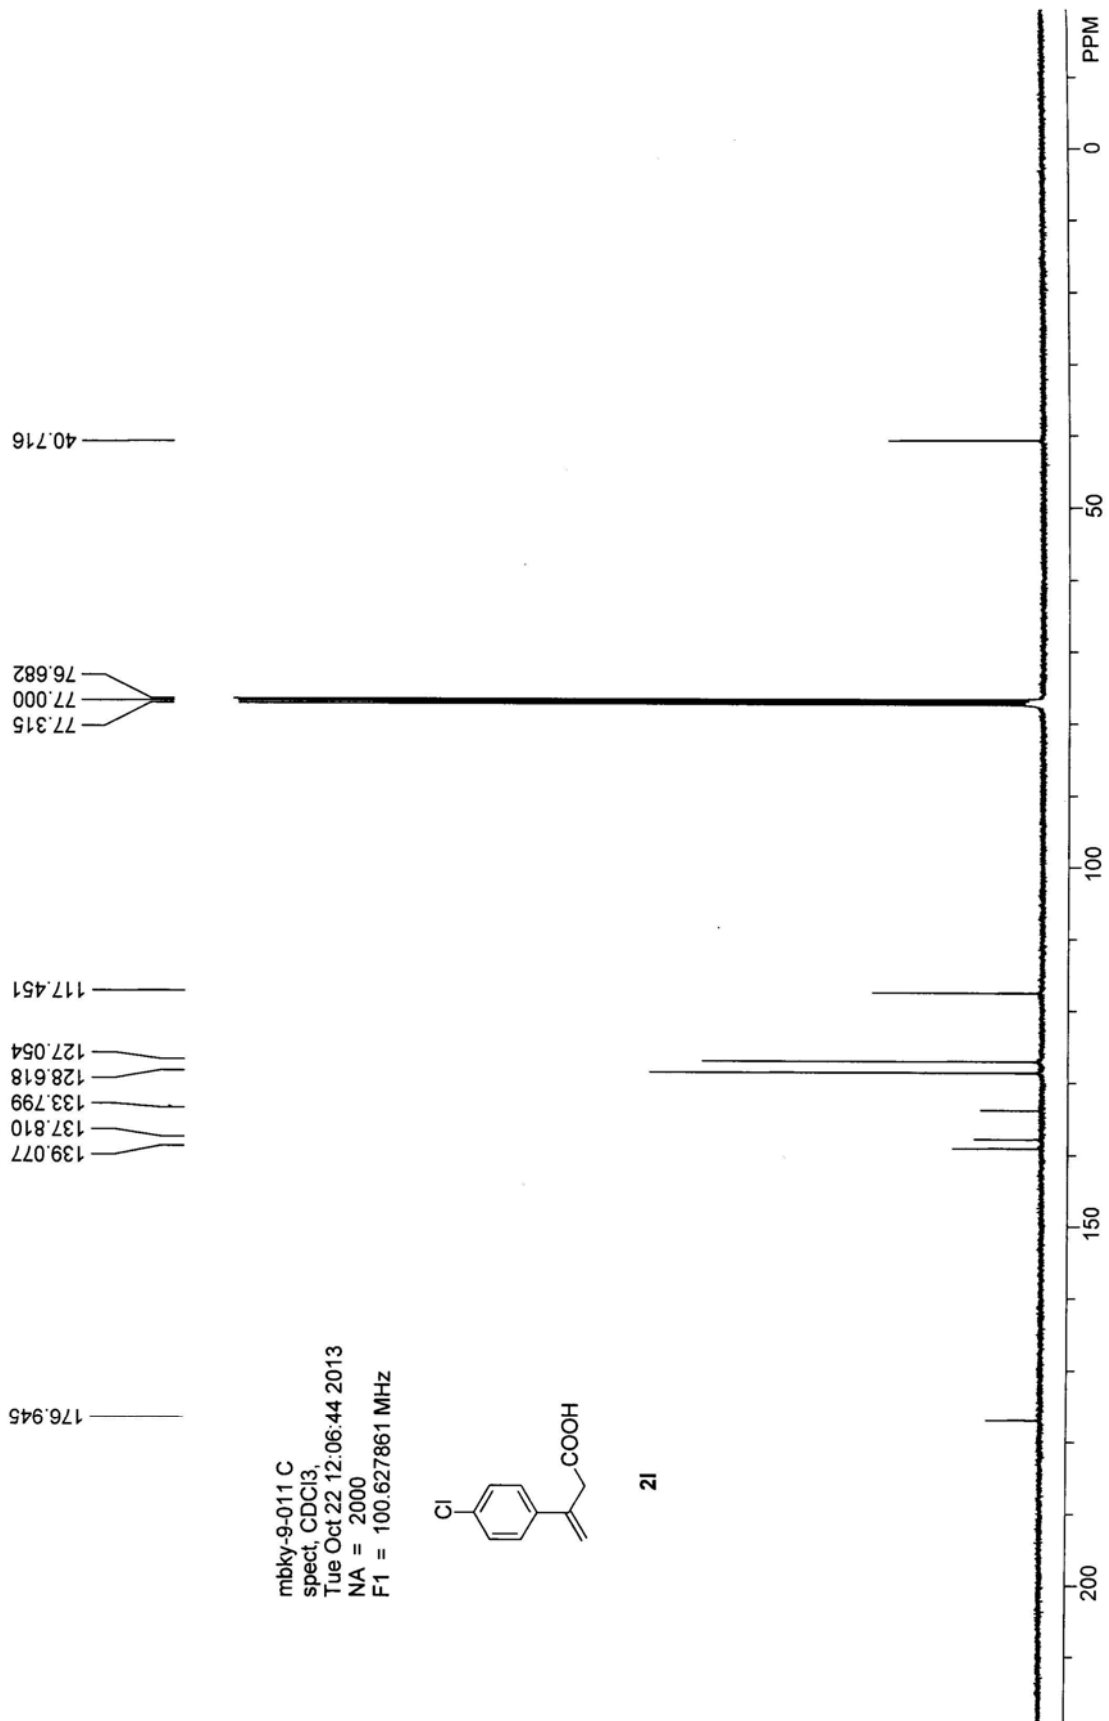

mbky-9-011 C  
 spect, CDCl<sub>3</sub>,  
 Tue Oct 22 12:06:44 2013  
 NA = 2000  
 F1 = 100.627861 MHz

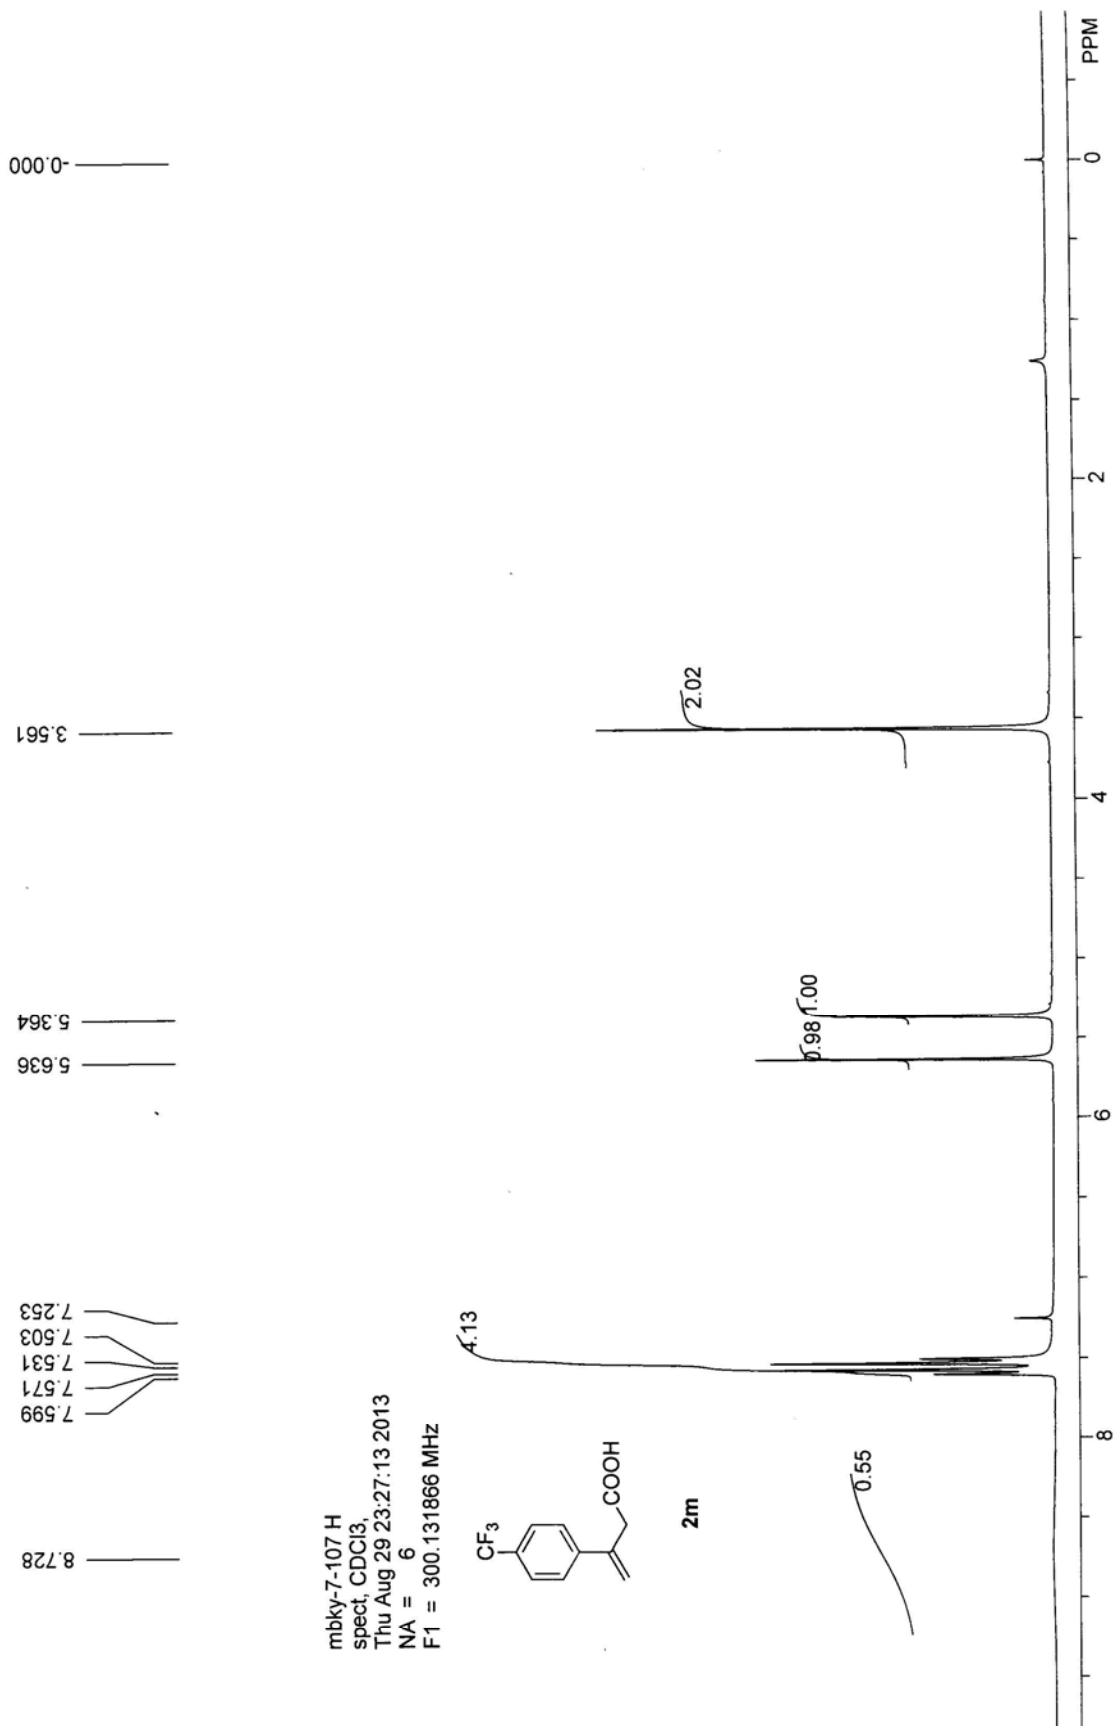

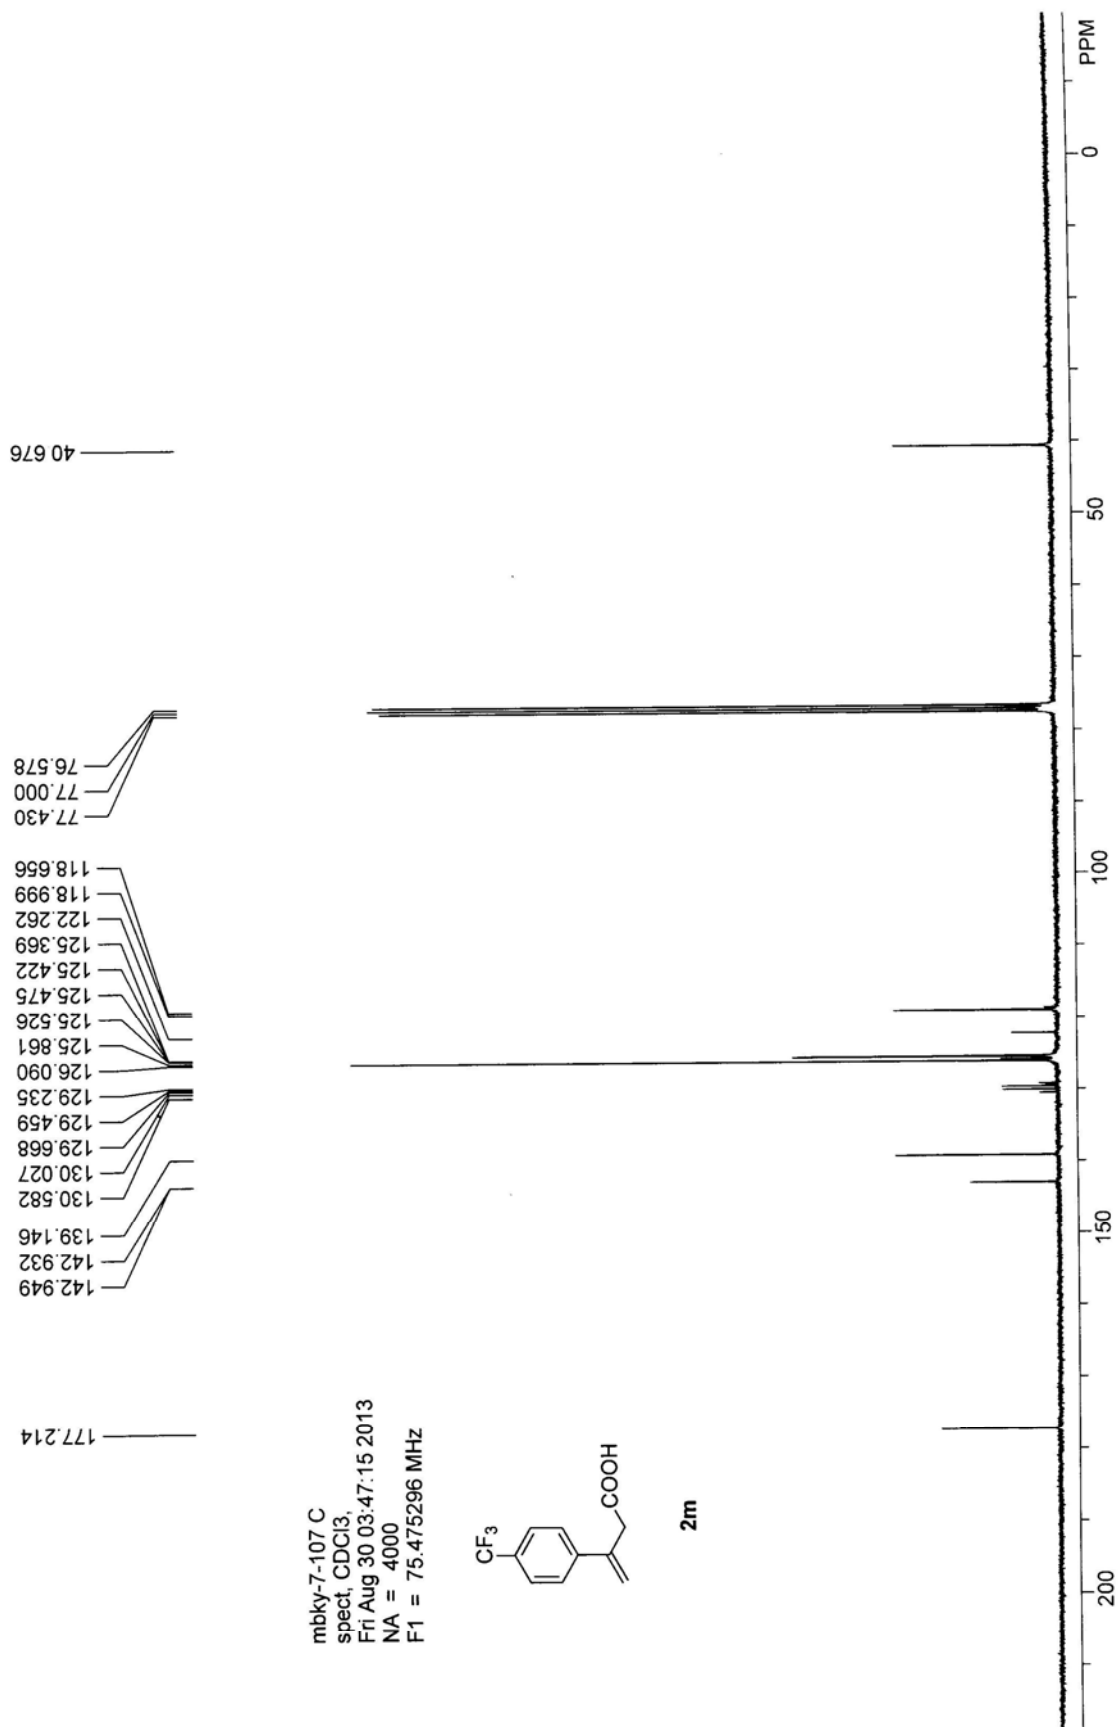

mbky-7-107 C  
 spect, CDCl<sub>3</sub>,  
 Fri Aug 30 03:47:15 2013  
 NA = 4000  
 F1 = 75.475296 MHz

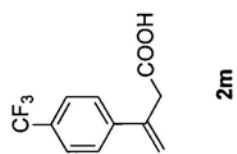

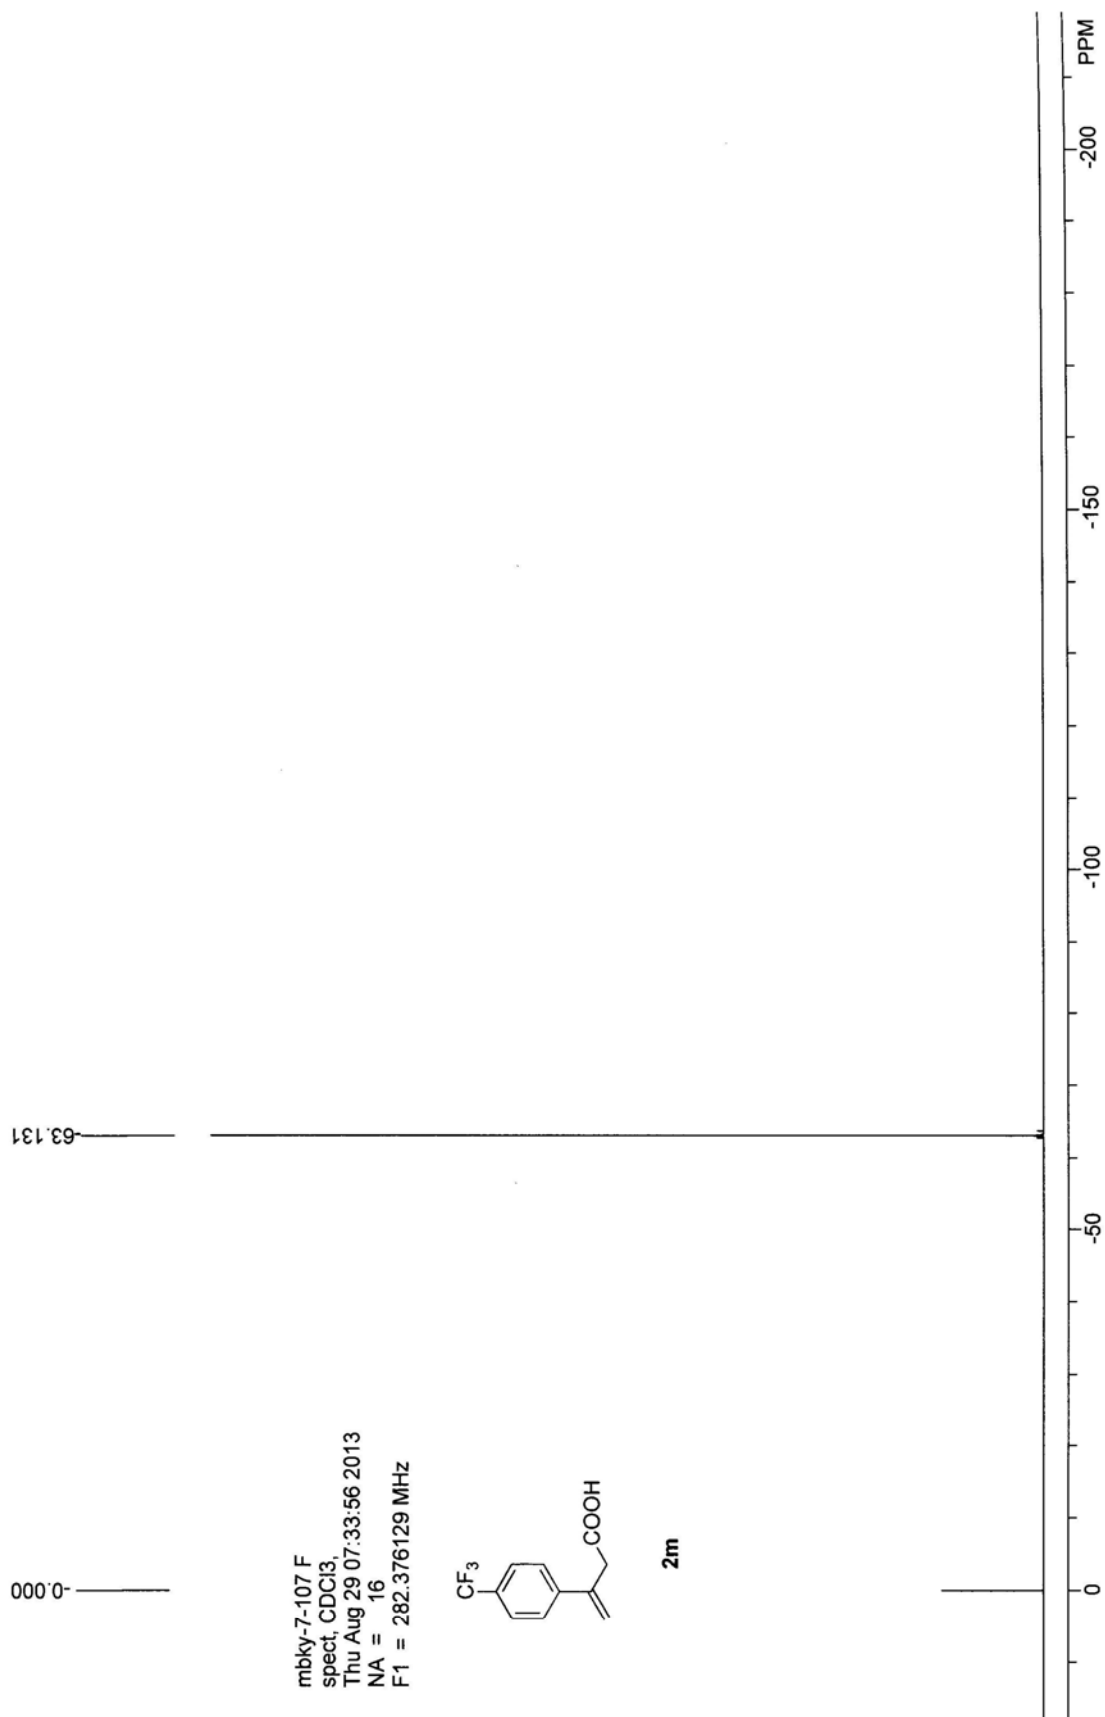

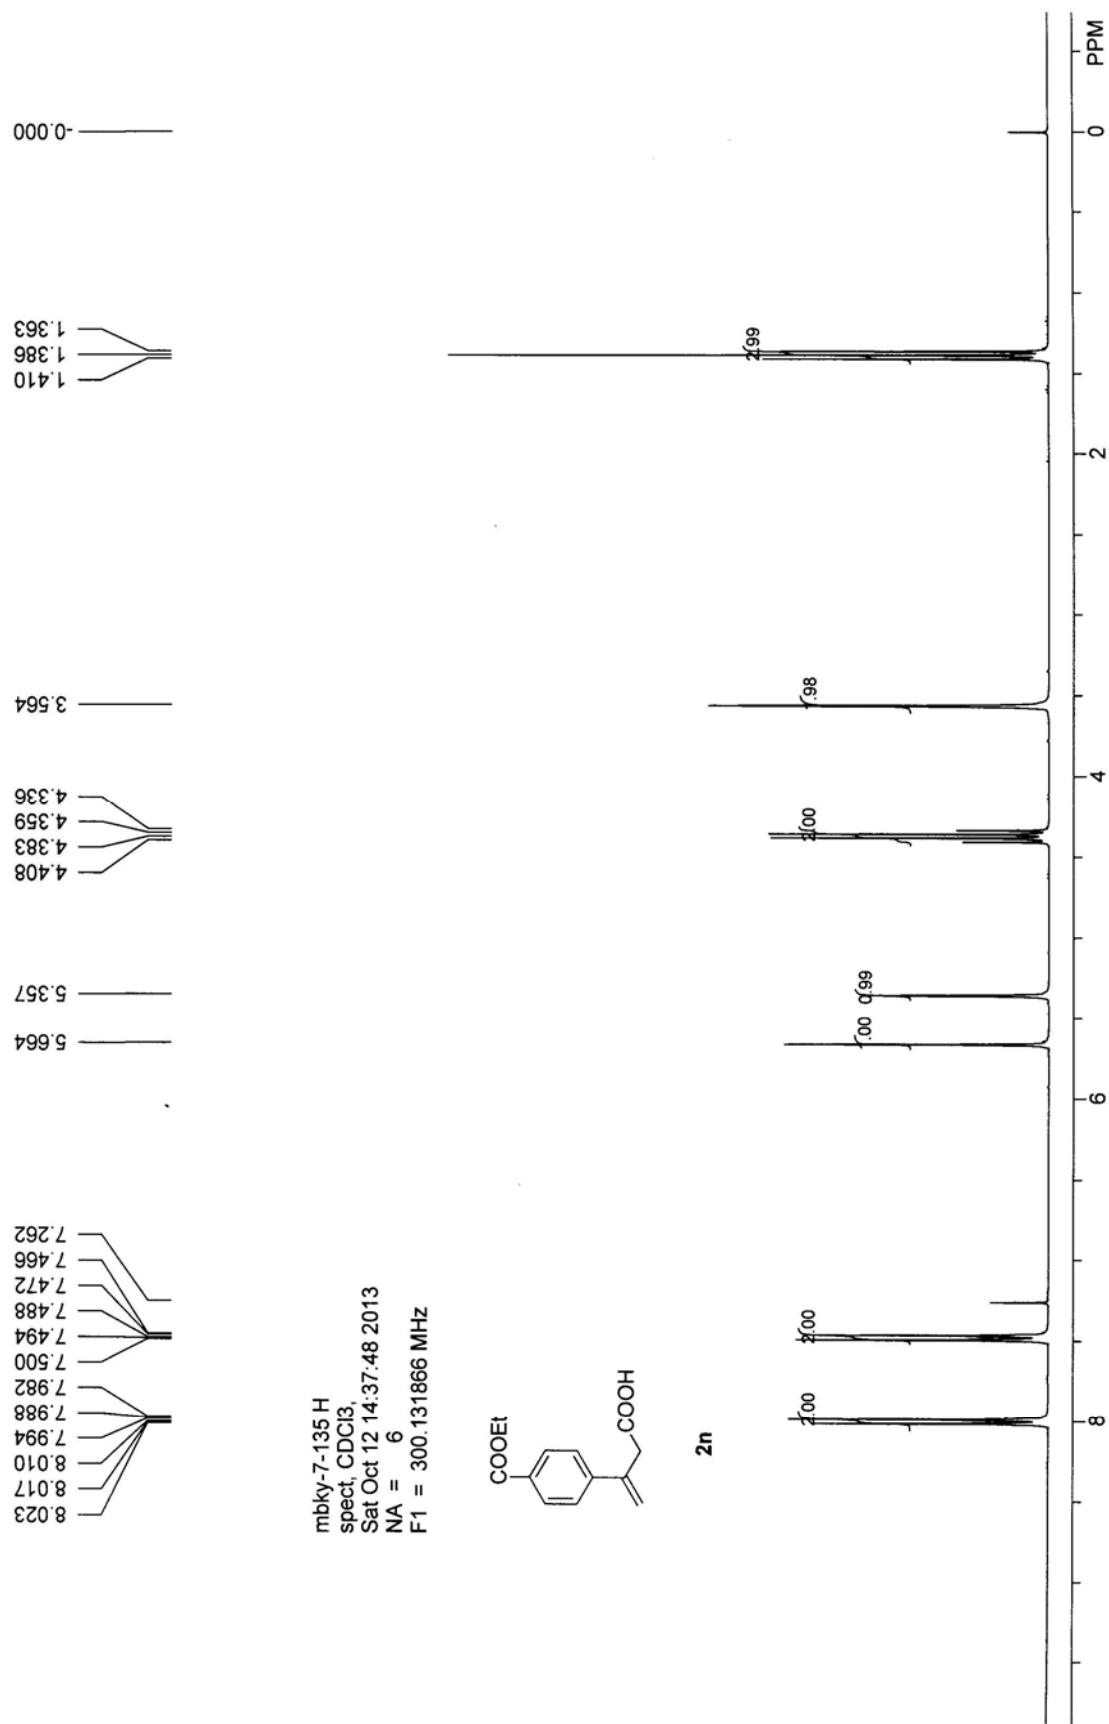

mbky-7-135 H  
spect, DMSO,  
Thu Dec 05 15:21:04 2013  
NA = 6  
F1 = 300.131866 MHz

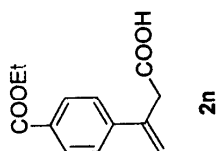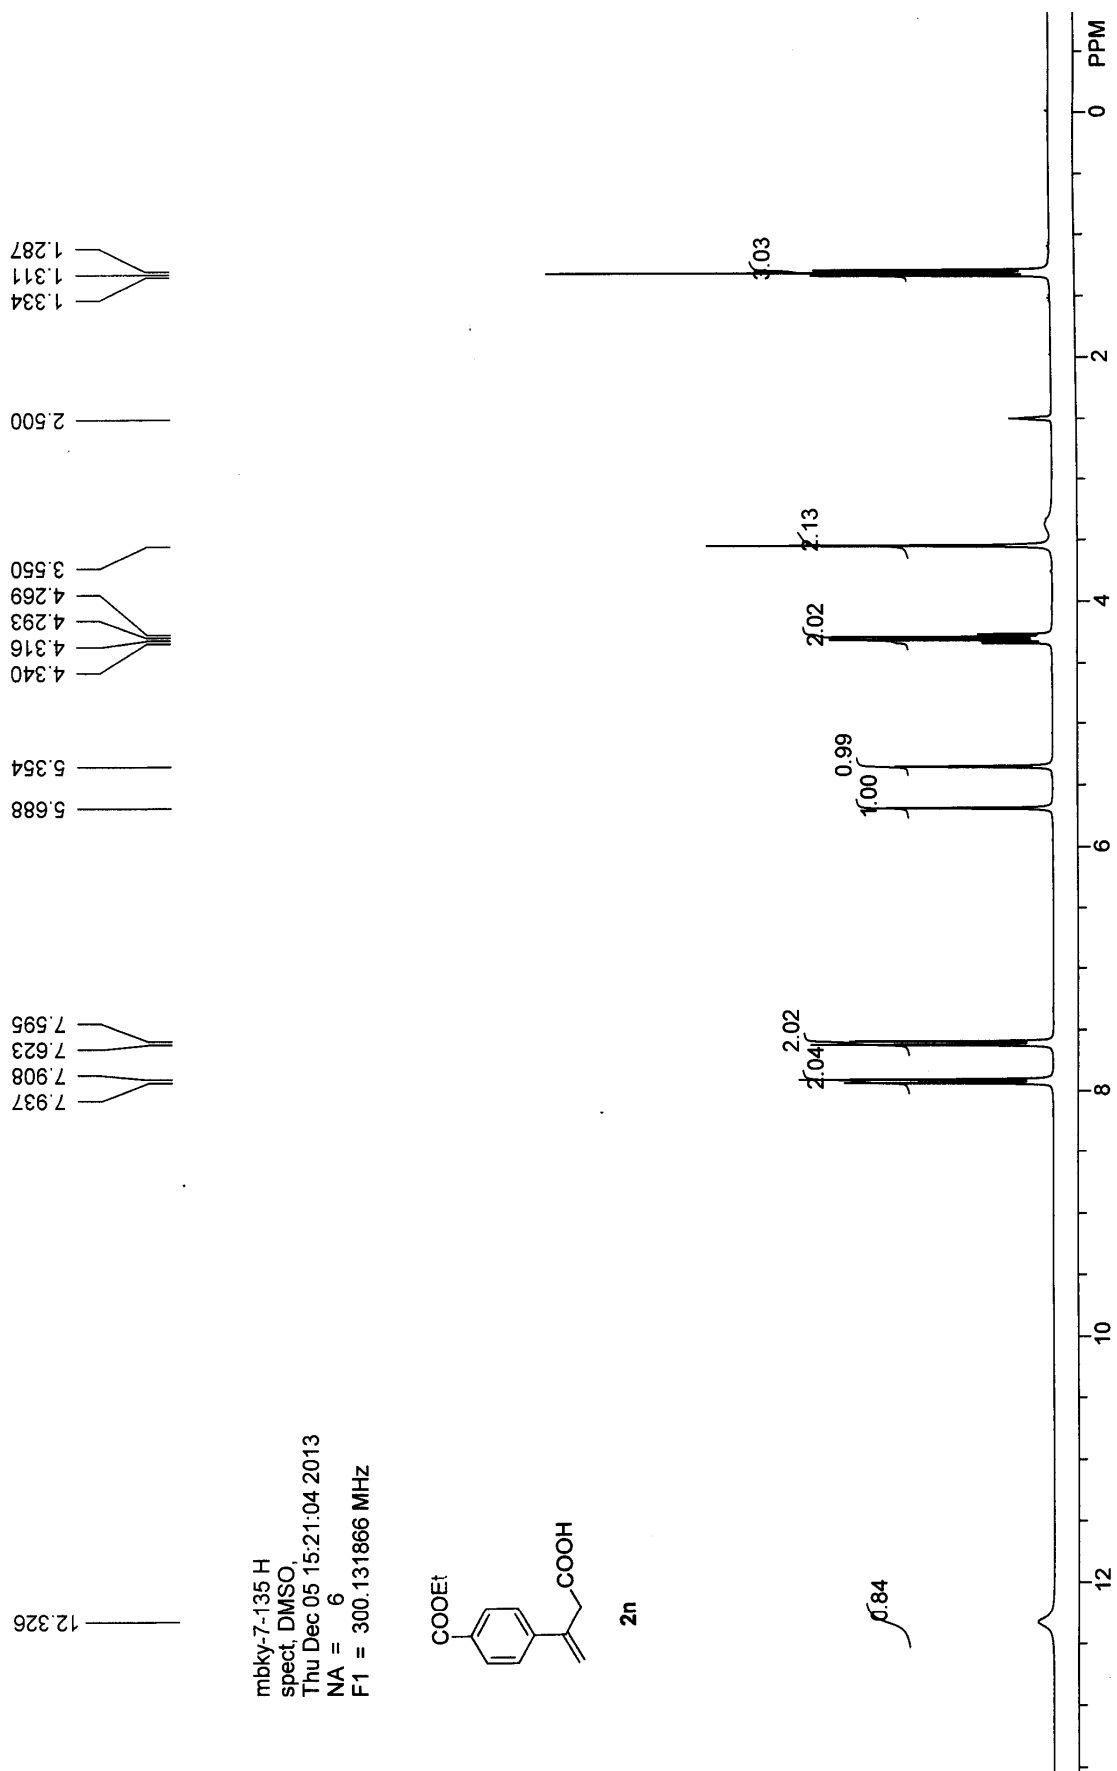

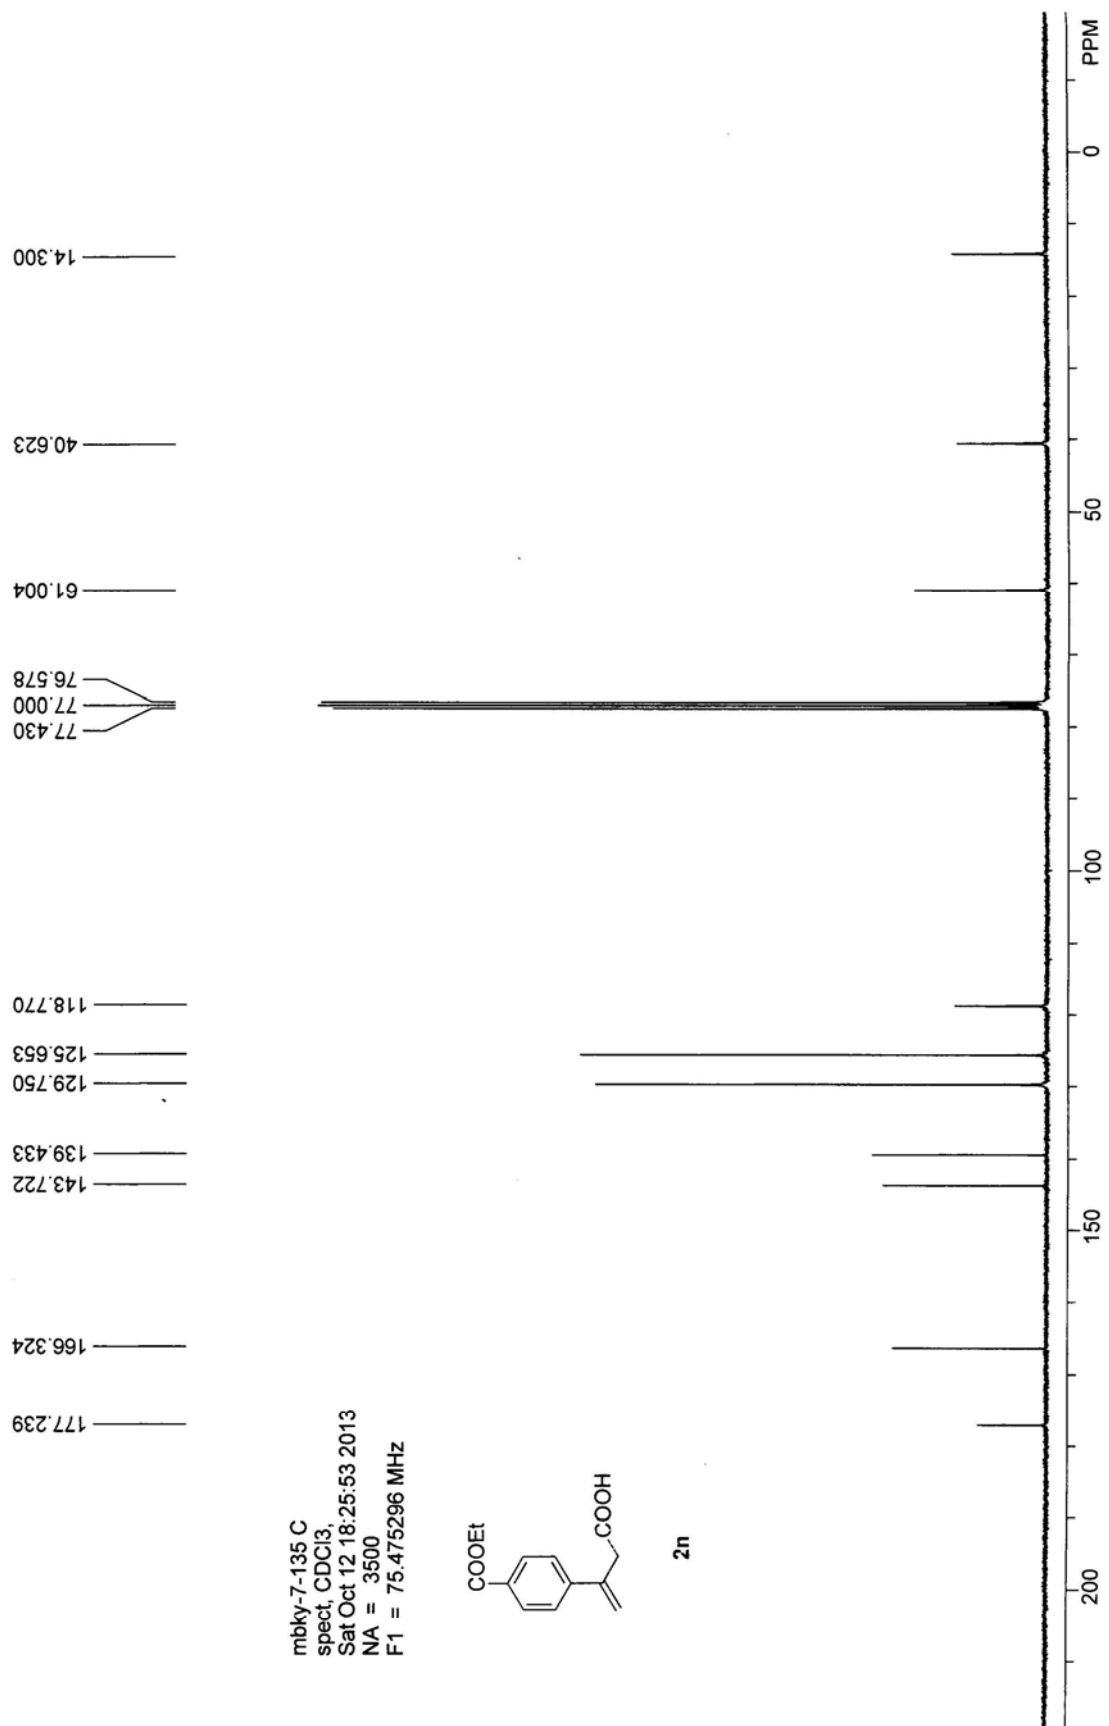

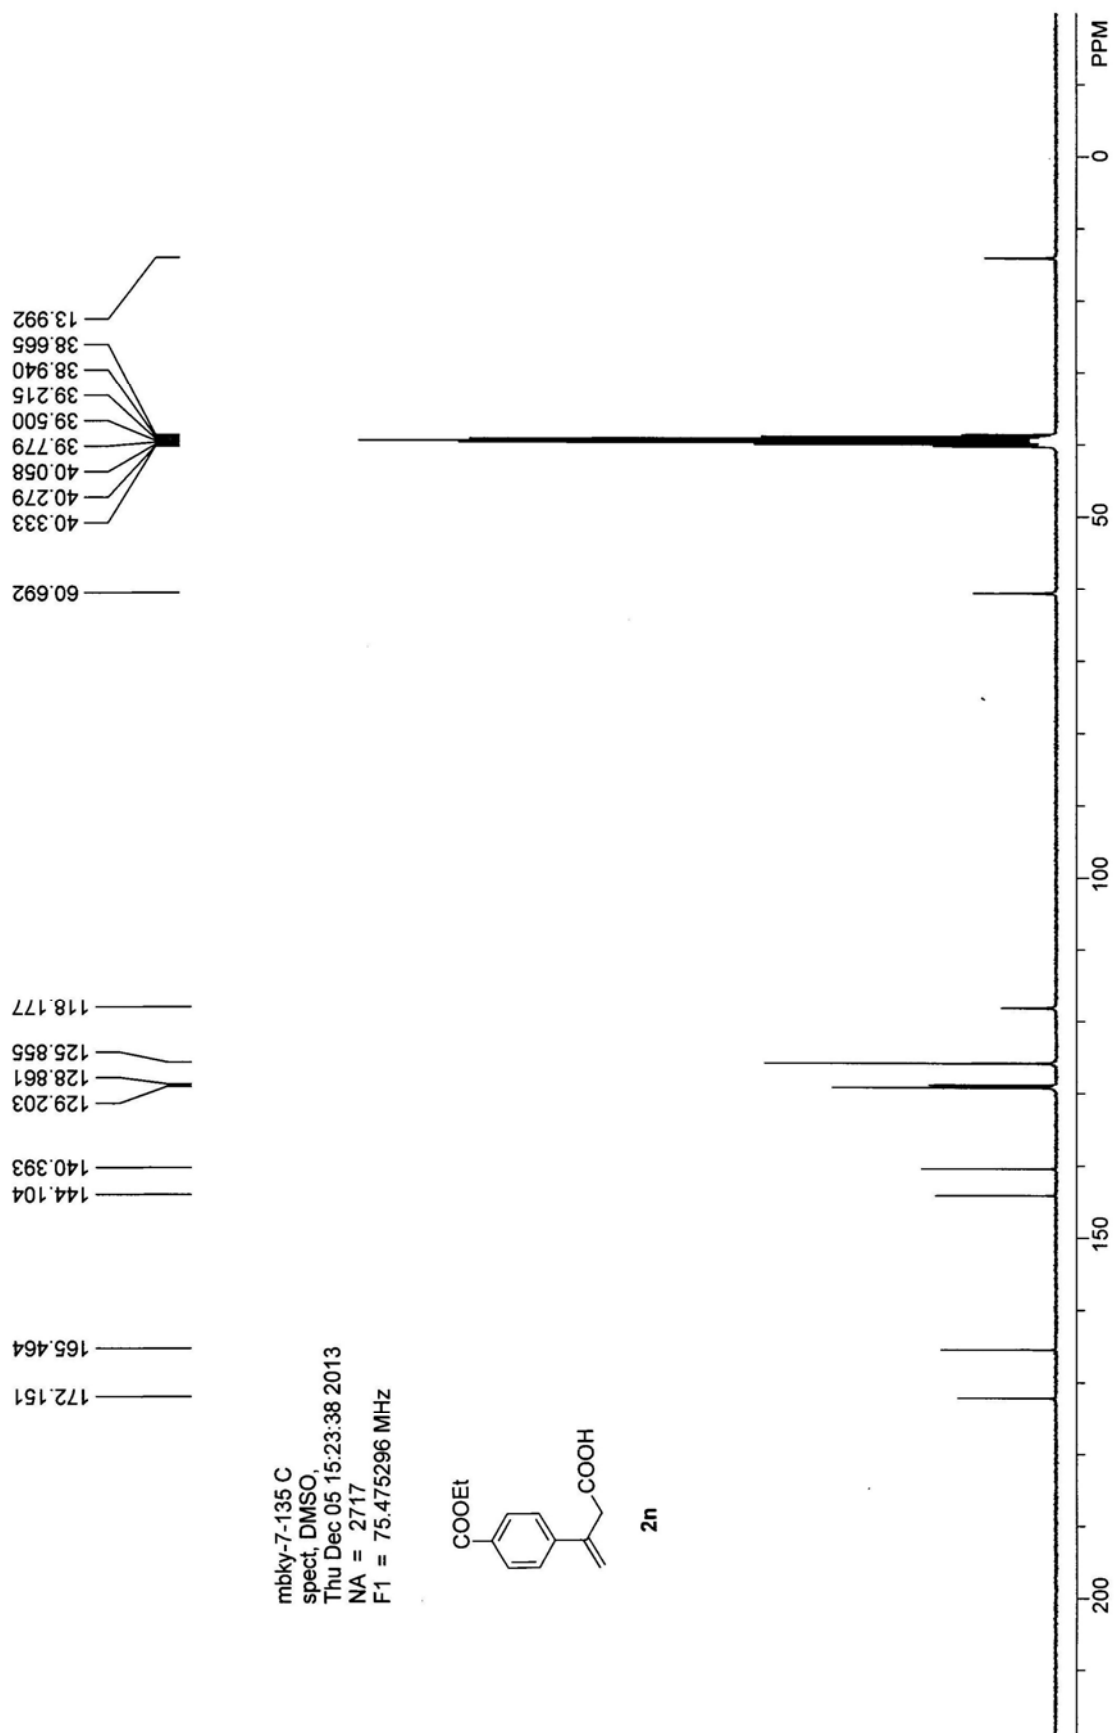

mbky-7-135 C  
spect, DMSO,  
Thu Dec 05 15:23:38 2013  
NA = 2717  
F1 = 75.475296 MHz

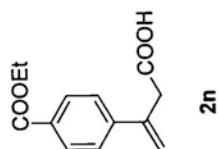



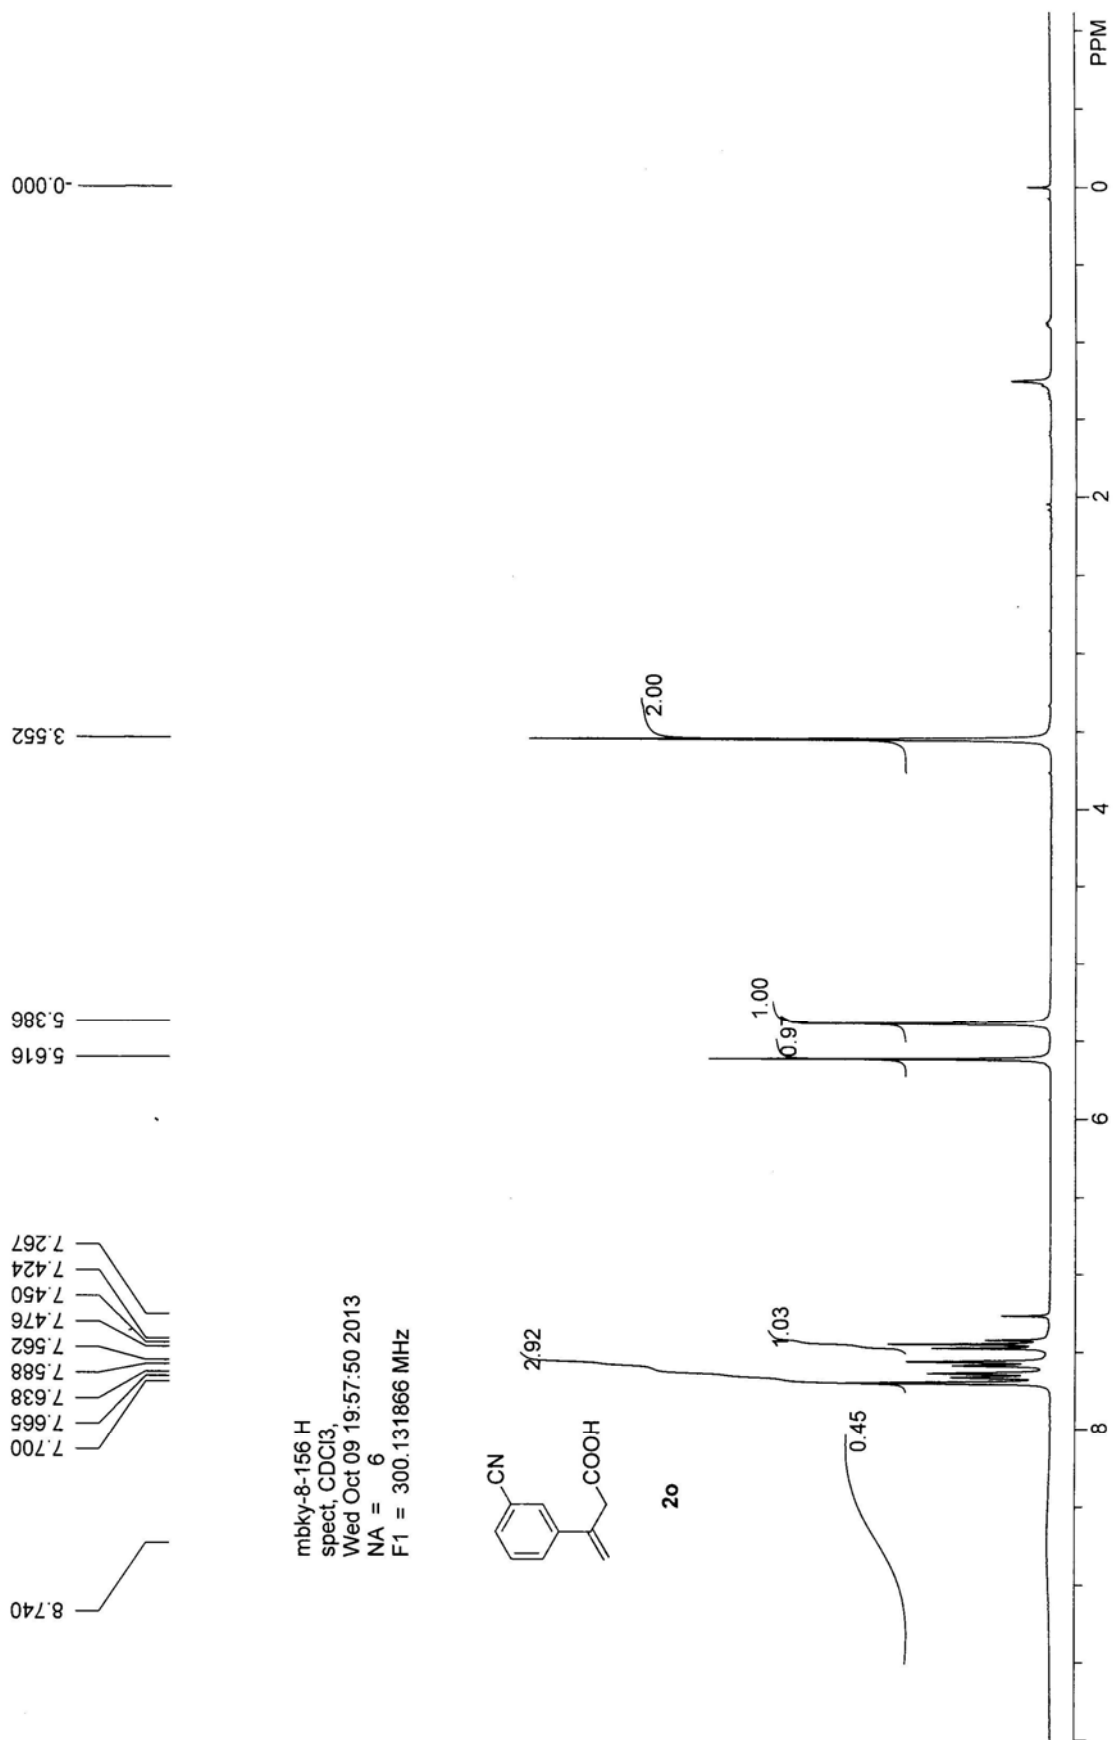

mbky-8-156 H  
spect, CDCl<sub>3</sub>,  
Wed Oct 09 19:57:50 2013  
NA = 6  
F1 = 300.131866 MHz

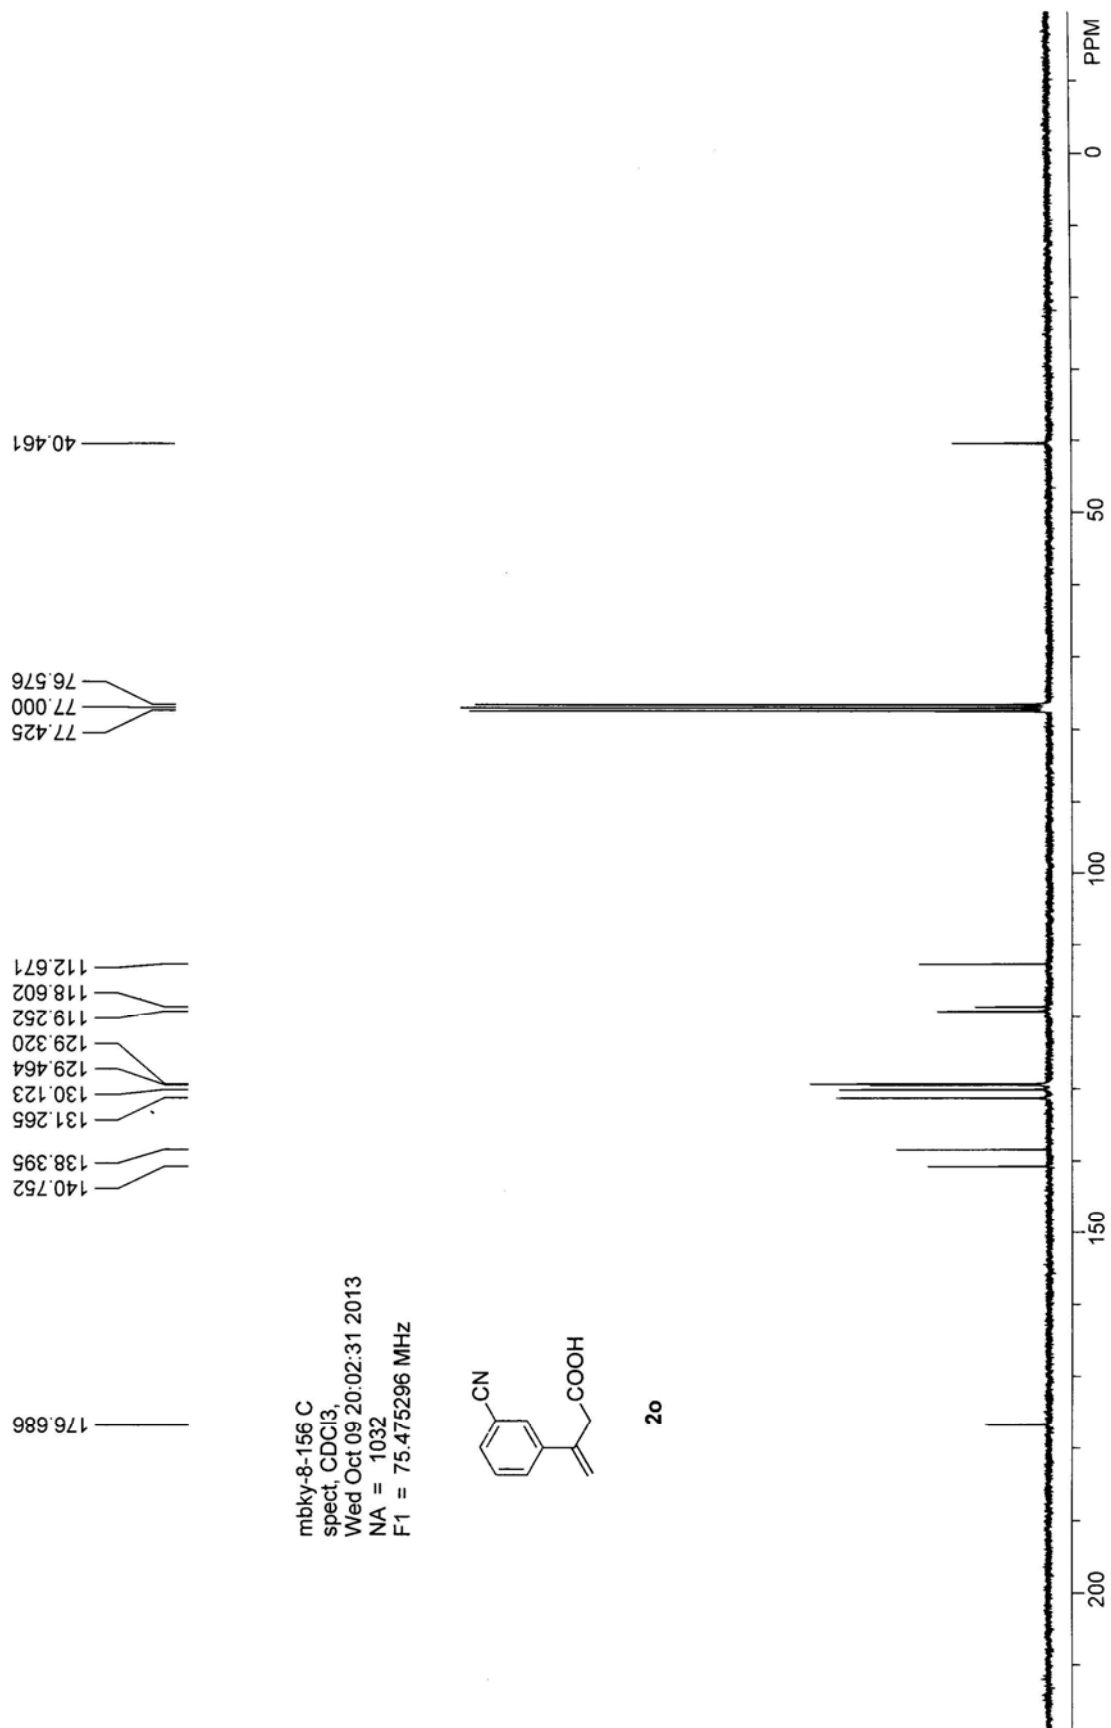

mbky-8-155 H  
 spect, CDCl<sub>3</sub>,  
 Wed Oct 09 21:14:53 2013  
 NA = 6  
 F1 = 300.131866 MHz

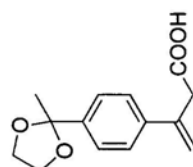

2p

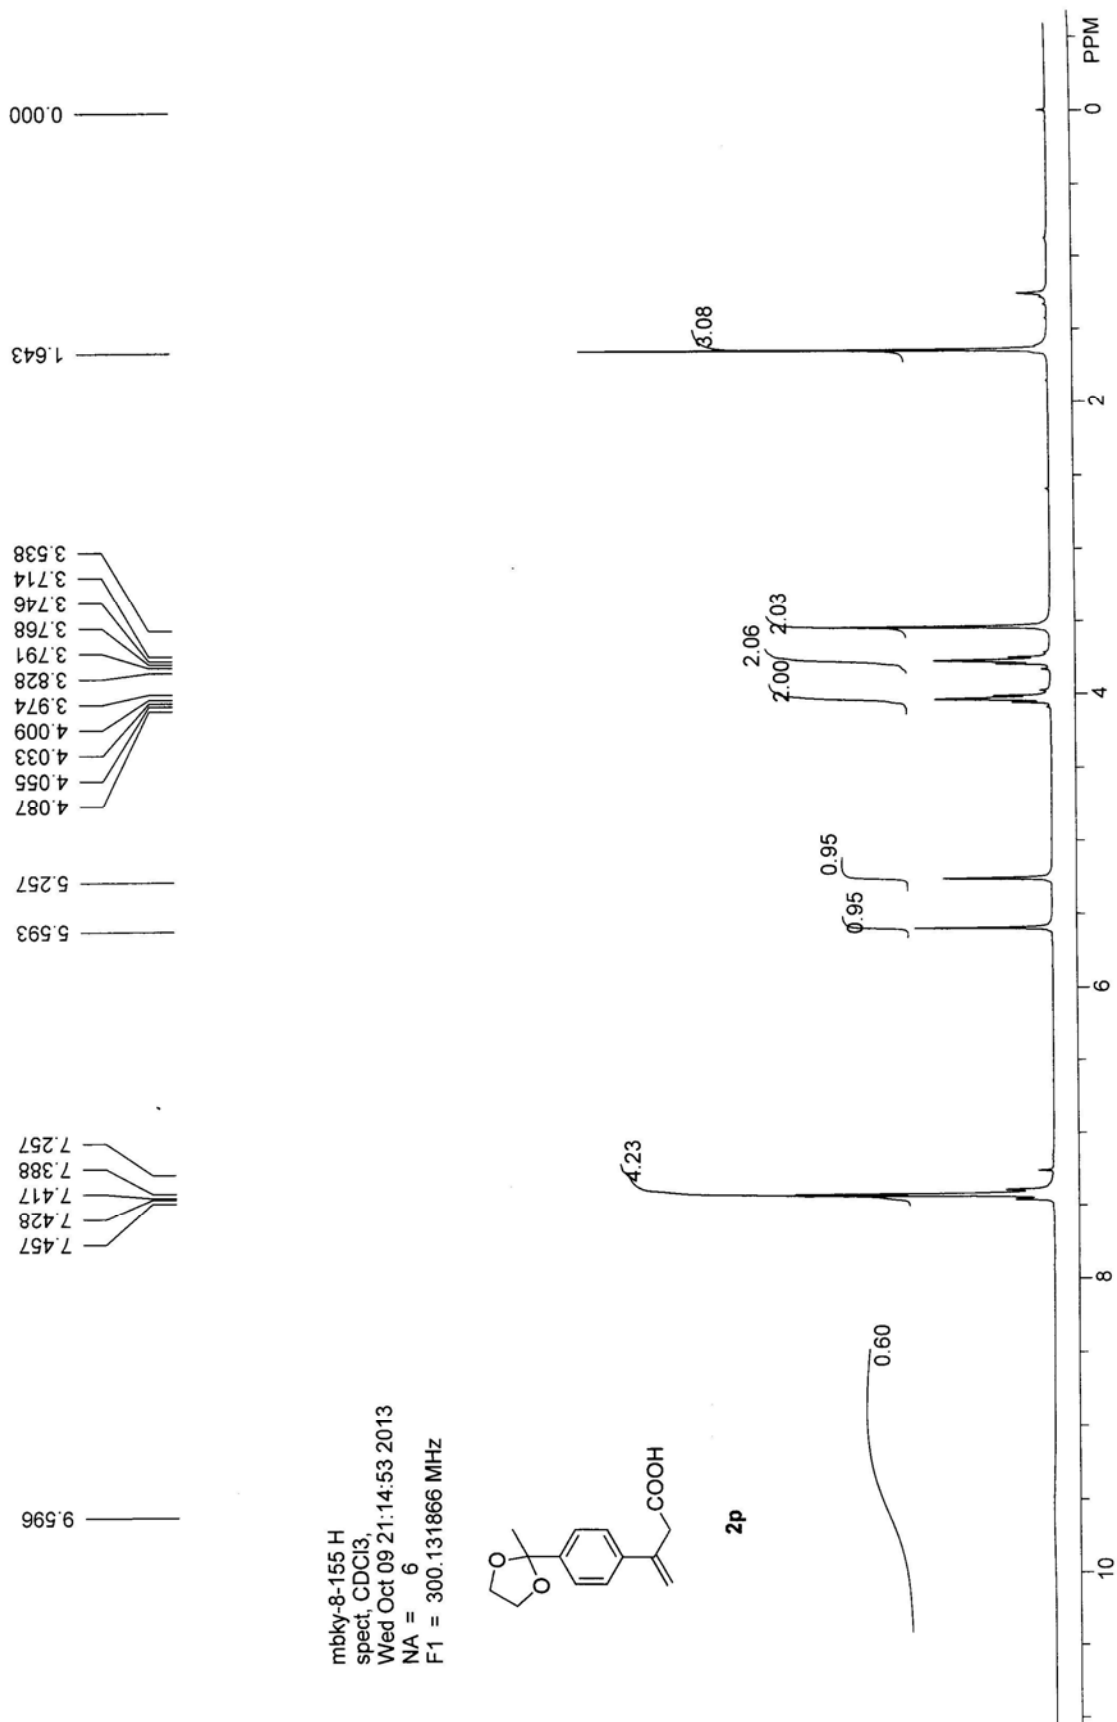

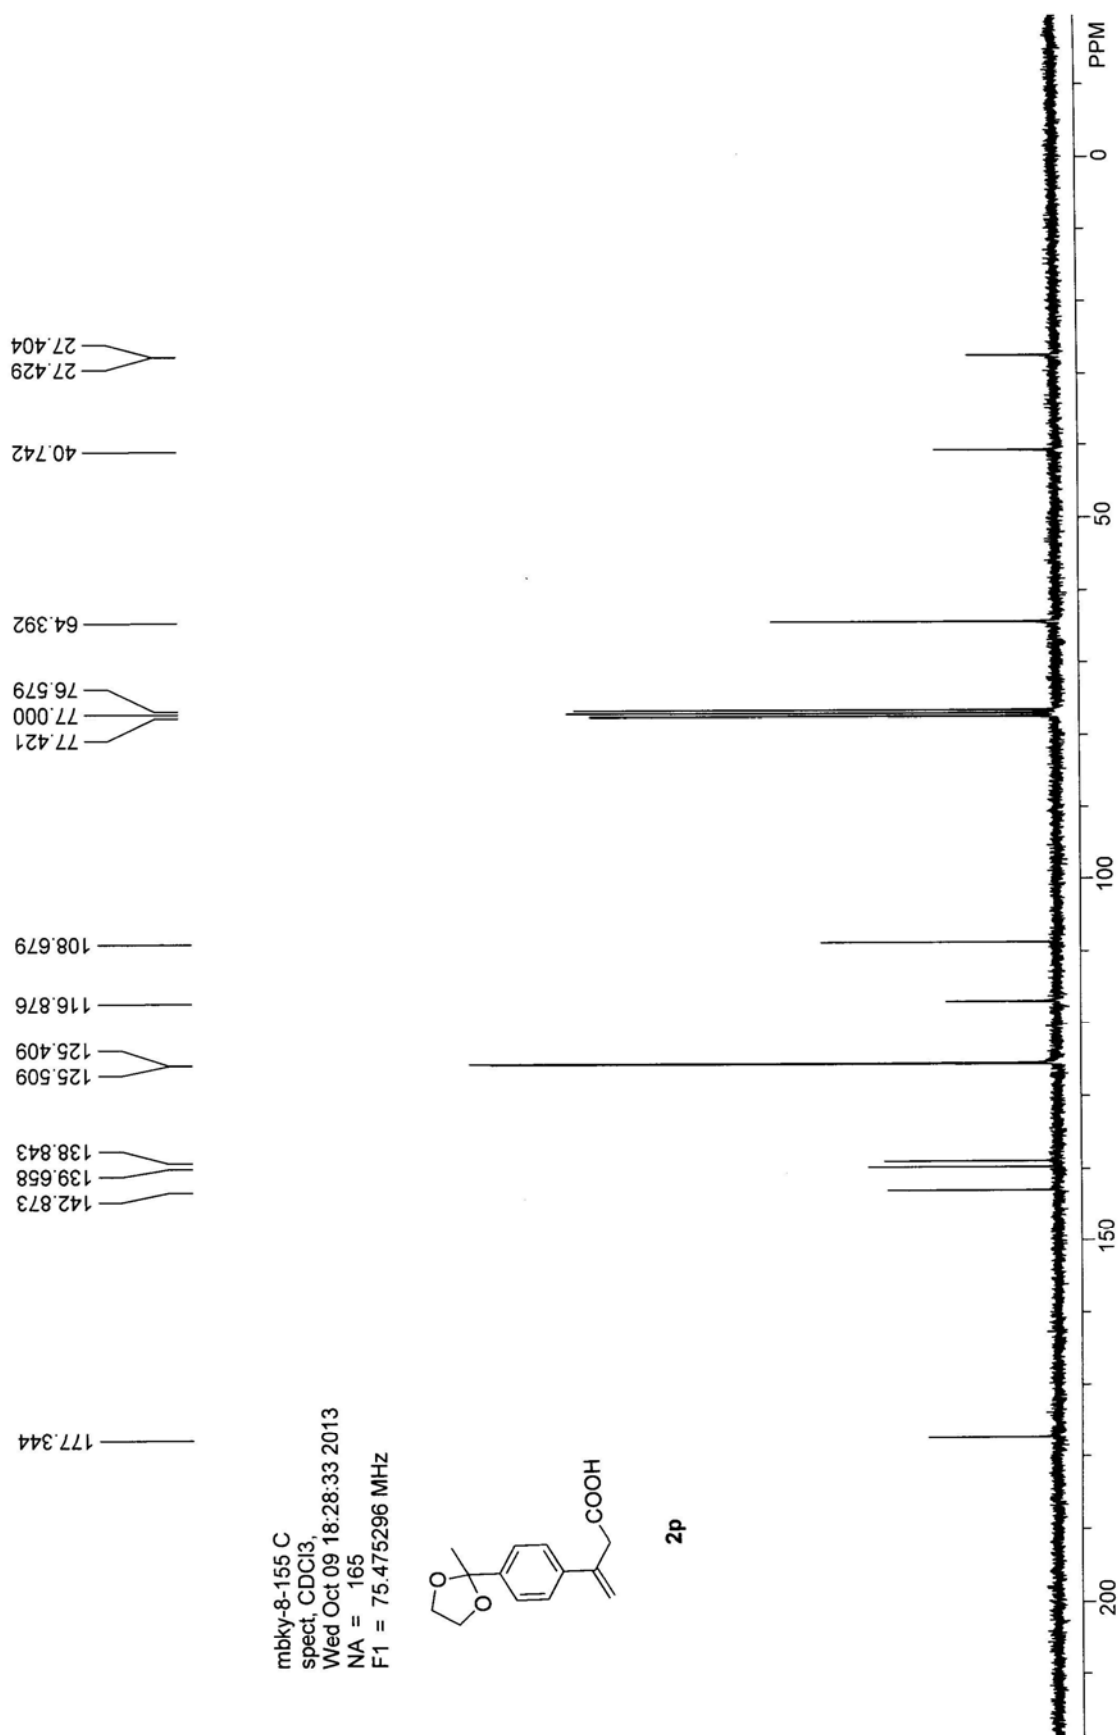

Supplement: c4cc00148f1.pdf [file c4cc00148f1.pdf]
